# Supplementary material
Source: publisher site journal article supplement (https://www.spandidos-publications.com/4913/downloadSupplementary)
Supplement: Supplementary file 1 [file downloadSupplementary]

## Sheet: sheet
Table SIV. All differentially expressed tRFs.
#Gene biotype: tRFs #Condition pair: HG_vs_Con Column A: tRF_ID, The ID of tRF & tiRNA. Column B: tRF_Seq, The sequence of tRF & tiRNA. Column C: Type, The type of tRF & tiRNA. Column D: tRFdb_ID, The database ID of tRFdb. Column E: MINTbase_ID, The database ID of MINTbase. Column F: Length, The length of sequence. Column G: AlignInfo, Alignment information, format (tRNA_id,tRNA_Seq,aminoacid-ant…
tRF, transfer RNA-derived fragments
Annotation							DE Statistic						CPM
tRF_ID	tRF_Seq	Type	tRFdb_ID	MINTbase_ID	Length	AlignInfo	log2FC	Fold_Change	p_value	q_value	HG_CPM	C_CPM	HG-1	HG-2	HG-3	C-1	C-2	C-3
tRF-52:72-Ala-AGC-1	GTTCGATCCCCAGCACCTCCA	tRF-3b	-	-	21	tRNA-Ala-AGC-1-1,GGGGGTGTAGCTCAGTGGTAGAGCGCGTGCTTAGCATGCACGAGGCCCTGGGTTCGATCCCCAGCACCTCCACCA,Ala-AGC,51	4.75828	27.0636	0.0619015	0.466316	3.69372	-1.06456	0	0	43.7759	0	0	0
tRF-52:70-chrM.Trp-TCA	ACAAGTTTAACTTCTGCCA	tRF-3b	-	-	19	chrM.tRNA6-TrpTCA,AGAAGTTTAGGATATACTAGTCCGCGAGCCTTCAAAGCCCTAAGAAAACACACAAGTTTAACTTCTGCCA,Trp-TCA,51	4.53466	23.1776	1.33279e-05	0.00353302	5.13891	0.604247	33.8228	53.35	38.3039	0	3.24651	0
tRF-54:72-chrM.Met-CAT	AATCCTTCCCGTACTACCA	tRF-3b	-	-	19	chrM.tRNA5-MetCAT,AGTAAGGTCAGCTAATTAAGCTATCGGGCCCATACCCCGAAAACGTTGGTTTAAATCCTTCCCGTACTACCA,Met-CAT,53	4.46337	22.0601	0.0582736	0.454698	3.3988	-1.06456	5.63714	33.3438	0	0	0	0
tRF-56:75-Ala-AGC-1	GATCCCCAGCACCTCCACCA	tRF-3b	-	-	20	tRNA-Ala-AGC-1-1,GGGGGTGTAGCTCAGTGGTAGAGCGCGTGCTTAGCATGCACGAGGCCCTGGGTTCGATCCCCAGCACCTCCACCA,Ala-AGC,55	4.19179	18.2749	0.0787334	0.525522	3.12723	-1.06456	0	26.675	5.47199	0	0	0
tRF-57:75-Trp-CCA-1-M5	AATCACGTCGGGGTCACCA	tRF-3b	-	-	19	tRNA-Trp-CCA-1-1,GACCTCGTGGCGCAATGGTAGCGCGTCTGACTCCAGATCAGAAGGTTGCGTGTTCAAATCACGTCGGGGTCACCA,Trp-CCA,56;tRNA-Trp-CCA-2-1,GACCTCGTGGCGCAACGGTAGCGCGTCTGACTCCAGATCAGAAGGCTGCGTGTTCGAATCACGTCGGGGTCACCA,Trp-CCA,56;tRNA-Trp-CCA-3-1,GGCCTCGTGGCGCAACGGTAGCGCGTCTGACTCCAGATCAGAAGGTTGCGTGTTCAAATCACGTCGGGGTCACCA,Trp-CCA,56;tRNA-Trp-CCA-4-1,GACCTCGTGGCGCAACGGTAGCGCGTCTGACTCCAGATCAGAAGGTTGCGTGTTCAAATCACGTCGGGGT…	4.13031	17.5125	0.146482	0.592343	3.06575	-1.06456	0	0	27.3599	0	0	0
tRF-1:15-Phe-GAA-1-M2	GCCGAAATAGCTCAG	tRF-5a	-	-	15	tRNA-Phe-GAA-1-1,GCCGAAATAGCTCAGTTGGGAGAGCGTTAGACTGAAGATCTAAAGGTCCCTGGTTCGATCCCGGGTTTCGGCACCA,Phe-GAA,0;tRNA-Phe-GAA-3-1,GCCGAAATAGCTCAGTTGGGAGAGCGTTAGACTGAAGATCTAAAGGTCCCTGGTTCAATCCCGGGTTTCGGCACCA,Phe-GAA,0	3.92875	15.229	0.106969	0.553325	2.86418	-1.06456	22.5485	0	0	0	0	0
tRF-1:31-Val-AAC-4	GTTTCTGTAGTGTAGTGGTTATCACGCTCGC	tRF-5c	-	-	31	tRNA-Val-AAC-4-1,GTTTCTGTAGTGTAGTGGTTATCACGCTCGCCTAACACGCGAGAGGTCCCCGGTTCGAAACCGGGCAGAAACACCA,Val-AAC,0	3.89974	14.9258	0.106969	0.553325	2.83518	-1.06456	0	26.675	0	0	0	0
tRF-+1:T15-Ile-AAT-1-2	GTGTGCTTATCTTTT	tRF-1	-	-	15	pre_tRNA-Ile-AAT-1-2,TTTATTTACATGACTTTAGAGCTCCCACTCTCTCGTCTCTGGCCGGTTAGCTCAGTTGGTTAGAGCGTGGTGCTAATAACGCCAAGGTCGCGGGTTCGATCCCCGTACGGGCCAGTGTGCTTATCTTTTTAAACAAAAGCAATTGTTCAATATT,Ile-AAT,114	3.51766	11.4531	0.299099	0.687555	2.4531	-1.06456	11.2743	0	5.47199	0	0	0
tRF-1:23-Glu-TTC-1	TCCCACATGGTCTAGCGGTTAGG	tRF-5b	5020b	-	23	tRNA-Glu-TTC-1-1,TCCCACATGGTCTAGCGGTTAGGATTCCTGGTTTTCACCCAGGCGGCCCGGGTTCGACTCCCGGTGTGGGAACCA,Glu-TTC,0	3.51531	11.4344	0.299099	0.687555	2.45075	-1.06456	0	20.0063	0	0	0	0
tRF-+1:T15-Arg-ACG-3	ACGTGTGCGATCTTT	tRF-1	-	-	15	pre_tRNA-Arg-ACG-3-1,ATTGGAGATCACTTATCGTGGAGGAGGCCTCCTCAGCACCGGGCCAGTGGCGCAATGGATAACGCGTCTGACTACGGATCAGAAGATTCTAGGTTCGACTCCTGGCTGGCTCGACGTGTGCGATCTTTTTCCTGAACCTTGGAAGGCCTGCTT,Arg-ACG,113	3.51531	11.4344	0.299099	0.687555	2.45075	-1.06456	0	20.0063	0	0	0	0
tRF-1:32-Cys-GCA-1-M3	GGGGGTATAGCTCAGTGGTAGAGCATTTGACT	tRF-5c	-	-	32	tRNA-Cys-GCA-1-1,GGGGGTATAGCTCAGTGGTAGAGCATTTGACTGCAGATCAAGAGGTCCCTGGTTCAAATCCAGGTGCCCCCTCCA,Cys-GCA,0;tRNA-Cys-GCA-2-1,GGGGGTATAGCTCAGTGGTAGAGCATTTGACTGCAGATCAAGAGGTCCCTGGTTCAAATCCGGGTGCCCCCTCCA,Cys-GCA,0;tRNA-Cys-GCA-3-1,GGGGGTATAGCTCAGTGGTAGAGCATTTGACTGCAGATCAAGAGGTCCCCGGTTCAAATCCGGGTGCCCCCTCCA,Cys-GCA,0	3.28888	9.77355	2.58969e-06	0.00143469	7.05936	3.77048	84.5571	233.406	169.632	7.54487	9.73953	15.3488
tRF-+1:T17-iMet-CAT-1	TCGGAGGCTTTGTTTTT	tRF-1	-	-	17	pre_tRNA-iMet-CAT-1-1,AAGCTCTTCTATGGAAAAGAAGAGAATGCTACCAGTGGGTAGCAGAGTGGCGCAGCGGAAGCGTGCTGGGCCCATAACCCAGAGGTCGATGGATCGAAACCATCCTCTGCTATCGGAGGCTTTGTTTTTAAAATTTTGACAATCTAATTAAA,iMet-CAT,112	3.26842	9.63588	0.000136693	0.018932	6.18077	2.91235	28.1857	153.381	87.5518	1.88622	16.2326	0
tRF-57:78-chrM.Leu-TAA	TCAAATCCTCTCCCTAATACCA	tRF-3b	-	-	22	chrM.tRNA3-LeuTAA,ATTAGGGTGGCAGAGCCAGGAAATTGCGTAAGACTTAAAACCTTGTTCCCAGAGGTTCAAATCCTCTCCCTAATACCA,Leu-TAA,56	3.20738	9.23672	0.0491947	0.429406	3.91548	0.708097	11.2743	6.66876	32.8319	0	0	7.67442
tRF-56:74-chrM.Gln-TTG	ATTCCTATTGTCCTAGCCA	tRF-3b	-	-	19	chrM.tRNA22-GlnTTG,TAGGATAAGGTGTTTAGGTAGCACGGAGAATTTTGAATTCTTAAGTGTAGGTTCAATTCCTATTGTCCTAGCCA,Gln-TTG,55	3.01519	8.08469	0.0154368	0.276853	4.37775	1.36256	33.8228	33.3438	5.47199	0	6.49302	0
tRF-1:23-chrM.Ser-GCT	AAGAAAGATTGCAAGAACTGCTA	tRF-5b	-	-	23	chrM.tRNA12-SerGCT,AAGAAAGATTGCAAGAACTGCTAATTCATGCTTCCATGTTTAAAAACATGGCTTTCTTACCA,Ser-GCT,0	2.99059	7.94799	0.532733	0.863327	1.92603	-1.06456	0	13.3375	0	0	0	0
tRF-+1:T14-Ile-AAT-1-5	GTGGTAGATTCTTT	tRF-1	-	-	14	pre_tRNA-Ile-AAT-1-5,AAAACCTCTCCCTTATATTTTACTCCGAGCTTGTACATCTGGCCGGTTAGCTCAGTTGGTTAGAGCGTGGTGCTAATAACGCCAAGGTCGCGGGTTCGATCCCCGTACGGGCCAGTGGTAGATTCTTTTCTCTAAATCCCTAATCCAAAGTTTA,Ile-AAT,114	2.99059	7.94799	0.532733	0.863327	1.92603	-1.06456	0	13.3375	0	0	0	0
tRF-+1:T16-Val-CAC-2-5	GTTTGGTACTTATTTT	tRF-1	-	-	16	pre_tRNA-Val-CAC-2-5,ATTGAGAGAATTGCGGAATACGAAGGGCCGCATCCAGCGAGTTTCCGTAGTGTAGTGGTTATCACGTTCGCCTCACACGCGAAAGGTCCCCGGTTCGAAACCGGGCGGAAACAGTTTGGTACTTATTTTATACCGTGAAATATAATTCTATGT,Val-CAC,113	2.99059	7.94799	0.532733	0.863327	1.92603	-1.06456	0	13.3375	0	0	0	0
tRF-59:76-Arg-CCG-1-M3	GTCCCTTCGTGGTCGCCA	tRF-3a	3035a	-	18	tRNA-Arg-CCG-1-1,GGCCGCGTGGCCTAATGGATAAGGCGTCTGATTCCGGATCAGAAGATTGAGGGTTCGAGTCCCTTCGTGGTCGCCA,Arg-CCG,58;tRNA-Arg-CCG-2-1,GGCCGCGTGGCCTAATGGATAAGGCGTCTGATTCCGGATCAGAAGATTGGGGGTTCGAGTCCCTTCGTGGTCGCCA,Arg-CCG,58;tRNA-Arg-TCG-2-1,GACCGCGTGGCCTAATGGATAAGGCGTCTGACTTCGGATCAGAAGATTGAGGGTTCGAGTCCCTTCGTGGTCGCCA,Arg-TCG,58	2.97571	7.86642	0.532733	0.863327	1.91114	-1.06456	0	6.66876	5.47199	0	0	0
tRF-+1:T18-iMet-CAT-1	TCGGAGGCTTTGTTTTTA	tRF-1	-	-	18	pre_tRNA-iMet-CAT-1-1,AAGCTCTTCTATGGAAAAGAAGAGAATGCTACCAGTGGGTAGCAGAGTGGCGCAGCGGAAGCGTGCTGGGCCCATAACCCAGAGGTCGATGGATCGAAACCATCCTCTGCTATCGGAGGCTTTGTTTTTAAAATTTTGACAATCTAATTAAA,iMet-CAT,112	2.9609	7.78609	0.532733	0.863327	1.89634	-1.06456	0	0	10.944	0	0	0
tRF-1:15-Thr-AGT-6	GGCTCTGTGGCTTAG	tRF-5a	-	-	15	tRNA-Thr-AGT-6-1,GGCTCTGTGGCTTAGCTGGTTAAAGCGCCTGTCTAGTAAACAGGAGATCCTGGGTTCAAATCCCAGCAGGGCCTCCA,Thr-AGT,0	2.88959	7.41059	0.0107022	0.257435	5.6	2.71041	84.5571	80.0251	5.47199	0.943109	16.2326	0
tRF-58:74-chrM.Gln-TTG	TCCTATTGTCCTAGCCA	tRF-3a	-	-	17	chrM.tRNA22-GlnTTG,TAGGATAAGGTGTTTAGGTAGCACGGAGAATTTTGAATTCTTAAGTGTAGGTTCAATTCCTATTGTCCTAGCCA,Gln-TTG,57	2.8712	7.31675	0.0648128	0.466316	4.23036	1.35916	0	66.6876	5.47199	0	6.49302	0
tRF-1:22-Tyr-GTA-3-M2	CCTTCGATAGCTCAGCTGGTAG	tRF-5b	-	-	22	tRNA-Tyr-GTA-3-1,CCTTCGATAGCTCAGCTGGTAGAGCGGAGGACTGTAGATCCTTAGGTCGCTGGTTCGATTCCGGCTCGAAGGACCA,Tyr-GTA,0;tRNA-Tyr-GTA-4-1,CCTTCGATAGCTCAGCTGGTAGAGCGGAGGACTGTAGATCCTTAGGTCGCTGGTTCGACTCCGGCTCGAAGGACCA,Tyr-GTA,0	2.75228	6.73782	0.152334	0.602807	3.35994	0.607657	11.2743	0	21.8879	0	3.24651	0
tRF-53:70-chrM.Trp-TCA	CAAGTTTAACTTCTGCCA	tRF-3a	-	-	18	chrM.tRNA6-TrpTCA,AGAAGTTTAGGATATACTAGTCCGCGAGCCTTCAAAGCCCTAAGAAAACACACAAGTTTAACTTCTGCCA,Trp-TCA,52	2.69512	6.47606	0.0103117	0.257435	4.58442	1.8893	33.8228	40.0125	10.944	0.943109	3.24651	7.67442
tRF-49:70-chrM.Trp-TCA	CACACAAGTTTAACTTCTGCCA	tRF-3b	-	-	22	chrM.tRNA6-TrpTCA,AGAAGTTTAGGATATACTAGTCCGCGAGCCTTCAAAGCCCTAAGAAAACACACAAGTTTAACTTCTGCCA,Trp-TCA,48	2.51257	5.70636	0.00145884	0.101025	6.20409	3.69152	95.8313	86.6938	76.6078	0.943109	22.7256	23.0233
tRF-1:14-Cys-GCA-15	GGTGGTATAGCTCA	tRF-5a	-	-	14	tRNA-Cys-GCA-15-1,GGTGGTATAGCTCAGGGGTAGAGCATTTGACTGCAGATCAAGAGATCCCTGGTTCGAATCCAGGTGCCCCCTCCA,Cys-GCA,0	2.47888	5.57463	1.91319e-05	0.00353302	8.95079	6.47191	321.317	620.194	848.158	31.1226	107.135	122.791
tRF-69:85-Ser-CGA-1-M2	TCCTGCTCACAGCGCCA	tRF-3a	-	-	17	tRNA-Ser-CGA-1-1,GCTGTGATGGCCGAGTGGTTAAGGCGTTGGACTCGAAATCCAATGGGGTCTCCCCGCGCAGGTTCGAATCCTGCTCACAGCGCCA,Ser-CGA,68;tRNA-Ser-CGA-3-1,GCTGTGATGGCCGAGTGGTTAAGGCGTTGGACTCGAAATCCAATGGGTTCTTCCCGCGCAGGTTCAAATCCTGCTCACAGCGCCA,Ser-CGA,68	2.37634	5.19219	0.233354	0.670905	3.12721	0.750864	0	26.675	5.47199	0	0	7.67442
tRF-67:85-Ser-AGA-1-M3	AATCCTGCCGACTACGCCA	tRF-3b	-	-	19	tRNA-Ser-AGA-1-1,GTAGTCGTGGCCGAGTGGTTAAGGCGATGGACTAGAAATCCATTGGGGTTTCCCCGCGCAGGTTCGAATCCTGCCGACTACGCCA,Ser-AGA,66;tRNA-Ser-AGA-2-1,GTAGTCGTGGCCGAGTGGTTAAGGCGATGGACTAGAAATCCATTGGGGTCTCCCCGCGCAGGTTCGAATCCTGCCGACTACGCCA,Ser-AGA,66;tRNA-Ser-TGA-2-1,GTAGTCGTGGCCGAGTGGTTAAGGCGATGGACTTGAAATCCATTGGGGTTTCCCCGCGCAGGTTCGAATCCTGCCGACTACGCCA,Ser-TGA,66	2.30778	4.95121	0.13823	0.578983	2.83786	0.530076	0	26.675	0	0.943109	0	0
tRF-1:24-Leu-CAA-1-M5	GTCAGGATGGCCGAGTGGTCTAAG	tRF-5b	-	-	24	tRNA-Leu-CAA-1-1,GTCAGGATGGCCGAGTGGTCTAAGGCGCCAGACTCAAGTTCTGGTCTCCCCTGGAGGCGTGGGTTCGAATCCCACTTCTGACACCA,Leu-CAA,0;tRNA-Leu-CAA-2-1,GTCAGGATGGCCGAGTGGTCTAAGGCGCCAGACTCAAGTTCTGGTCTCCGTATGGAGGCGTGGGTTCGAATCCCACTTCTGACACCA,Leu-CAA,0;tRNA-Leu-CAA-3-1,GTCAGGATGGCCGAGTGGTCTAAGGCGCCAGACTCAAGTTCTGGTCTCCGAATGGAGGCGTGGGTTCGAATCCCACTTCTGACACCA,Leu-CAA,0;tRNA-Leu-CAA-4-1,GTCAGGATGGCCGAGTGGTCTAAGGCGCCAGACTCAAG…	2.29966	4.92342	0.134476	0.578983	3.54403	1.24437	5.63714	0	32.8319	1.88622	0	0
tRF-55:75-Ala-CGC-2-M2	CAATCCCCGGCATCTCCACCA	tRF-3b	-	-	21	tRNA-Ala-CGC-2-1,GGGGATGTAGCTCAGTGGTAGAGCGCGCGCTTCGCATGTGTGAGGTCCCGGGTTCAATCCCCGGCATCTCCACCA,Ala-CGC,54;tRNA-Ala-TGC-4-1,GGGGATGTAGCTCAGTGGTAGAGCGCATGCTTTGCATGTATGAGGCCCCGGGTTCAATCCCCGGCATCTCCACCA,Ala-TGC,54	2.27175	4.82908	0.110558	0.55338	2.8228	0.55105	0	20.0063	5.47199	0.943109	0	0
tRF-1:32-Glu-TTC-2	TCCCATATGGTCTAGCGGTTAGGATTCCTGGT	tRF-5c	-	-	32	tRNA-Glu-TTC-2-1,TCCCATATGGTCTAGCGGTTAGGATTCCTGGTTTTCACCCAGGCGGCCCGGGTTCGACTCCCGGTATGGGAACCA,Glu-TTC,0	2.22936	4.68927	0.00901903	0.257435	5.56274	3.33337	50.7342	86.6938	32.8319	0.943109	22.7256	7.67442
tRF-1:32-Glu-TTC-1	TCCCACATGGTCTAGCGGTTAGGATTCCTGGT	tRF-5c	-	-	32	tRNA-Glu-TTC-1-1,TCCCACATGGTCTAGCGGTTAGGATTCCTGGTTTTCACCCAGGCGGCCCGGGTTCGACTCCCGGTGTGGGAACCA,Glu-TTC,0	2.2133	4.63733	0.0026532	0.133625	6.16917	3.95587	50.7342	73.3563	131.328	4.71554	19.4791	23.0233
tiRNA-1:20-chrM.Ser-GCT	AAGAAAGATTGCAAGAACTG	tiRNA-5	-	-	20	chrM.tRNA12-SerGCT,AAGAAAGATTGCAAGAACTGCTAATTCATGCTTCCATGTTTAAAAACATGGCTTTCTTACCA,Ser-GCT,0	2.16949	4.49863	1	1	1.10492	-1.06456	5.63714	0	0	0	0	0
tiRNA-32:71-chrM.His-GTG	TGAATCTGACAACAGGAAATAAACCTCCTTATTCACCCCA	tiRNA-3	-	-	40	chrM.tRNA11-HisGTG,GTGAATATAGTTTACAAAAAACATTAGACTGTGAATCTGACAACAGGAAATAAACCTCCTTATTCACCCCA,His-GTG,31	2.16949	4.49863	1	1	1.10492	-1.06456	5.63714	0	0	0	0	0
tRF-1:23-chrM.Ser-TGA	GAGAAAGACATATAGGATATGAG	tRF-5b	-	-	23	chrM.tRNA17-SerTGA,GAGAAAGACATATAGGATATGAGATTGGCTTGAAACCAATTTTAGGGGGTTCGATTCCTTCCTTTCTTACCA,Ser-TGA,0	2.15985	4.46867	1	1	1.09528	-1.06456	0	6.66876	0	0	0	0
tRF-1:31-chrM.Ser-GCT	AAGAAAGATTGCAAGAACTGCTAATTCATGC	tRF-5c	-	-	31	chrM.tRNA12-SerGCT,AAGAAAGATTGCAAGAACTGCTAATTCATGCTTCCATGTTTAAAAACATGGCTTTCTTACCA,Ser-GCT,0	2.15985	4.46867	1	1	1.09528	-1.06456	0	6.66876	0	0	0	0
tRF-+1:T33-Thr-CGT-1	GCCCTCTTTCCGTGTGGATTTAAGAATTTTTTA	tRF-1	-	-	33	pre_tRNA-Thr-CGT-1-1,GCGCCAGCATAGAAGCTCGCGCGGCCGCCACCTCAACGCAGGCGCGGTGGCCAAGTGGTAAGGCGTCGGTCTCGTAAACCGAAGATCACGGGTTCGAACCCCGTCCGTGCCTGCCCTCTTTCCGTGTGGATTTAAGAATTTTTTAGGTGAGA,Thr-CGT,112	2.15985	4.46867	1	1	1.09528	-1.06456	0	6.66876	0	0	0	0
tRF-+1:T17-Arg-ACG-3	ACGTGTGCGATCTTTTT	tRF-1	-	-	17	pre_tRNA-Arg-ACG-3-1,ATTGGAGATCACTTATCGTGGAGGAGGCCTCCTCAGCACCGGGCCAGTGGCGCAATGGATAACGCGTCTGACTACGGATCAGAAGATTCTAGGTTCGACTCCTGGCTGGCTCGACGTGTGCGATCTTTTTCCTGAACCTTGGAAGGCCTGCTT,Arg-ACG,113	2.15985	4.46867	1	1	1.09528	-1.06456	0	6.66876	0	0	0	0
tRF-+1:T17-Trp-CCA-3	TCTGTGTTCTTTATTTT	tRF-1	-	-	17	pre_tRNA-Trp-CCA-3-1,GCTTCTGTTCACGACACCCACAATGCTCGGGCCACAGGGAGGCCTCGTGGCGCAACGGTAGCGCGTCTGACTCCAGATCAGAAGGTTGCGTGTTCAAATCACGTCGGGGTCATCTGTGTTCTTTATTTTCTAATTACCTGACCTCTTTAATA,Trp-CCA,112	2.15985	4.46867	1	1	1.09528	-1.06456	0	6.66876	0	0	0	0
tRF-+1:T14-Asp-GTC-1-13	AGTGATCTCTATTT	tRF-1	-	-	14	pre_tRNA-Asp-GTC-1-13,AAACTTCCAGTACTGTCCCTGAACTACTTGCACTGCCTCATCCTCGTTAGTATAGTGGTGAGTATCCCCGCCTGTCACGCGGGAGACCGGGGTTCGATTCCCCGACGGGGAGAGTGATCTCTATTTTTAAGTATATTCCCTCCTAAAAGTTT,Asp-GTC,112	2.15985	4.46867	1	1	1.09528	-1.06456	0	6.66876	0	0	0	0
tRF-1:32-Val-AAC-2-M3	GTTTCCGTAGTGTAGTGGTCATCACGCTCGCC	tRF-5c	-	-	32	tRNA-Val-AAC-2-1,GTTTCCGTAGTGTAGTGGTCATCACGCTCGCCTAACACGCGAGAGGTCCCCGGTTCGAAACCGGGCGGAAACACCA,Val-AAC,0;tRNA-Val-AAC-3-1,GTTTCCGTAGTGTAGTGGTCATCACGCTCGCCTAACACGCGAGAGGTCCCCGGTTCGAAACCGGGCGGGAACACCA,Val-AAC,0;tRNA-Val-CAC-3-1,GTTTCCGTAGTGTAGTGGTCATCACGCTCGCCTCACACGCGAGAGGTCCCCGGTTCGAAACCGGGCGGGAACACCA,Val-CAC,0	2.14313	4.41718	1	1	1.07856	-1.06456	0	0	5.47199	0	0	0
tRF-+1:T29-Cys-GCA-3	TACAGGCCCATAGTCGAGGGGCACTCTTT	tRF-1	-	-	29	pre_tRNA-Cys-GCA-3-1,GAGAAGGTAAATTGGTTCAGAGAGGCTCTTTCTGCCAGCAGGGGGTATAGCTCAGTGGTAGAGCATTTGACTGCAGATCAAGAGGTCCCCGGTTCAAATCCGGGTGCCCCCTTACAGGCCCATAGTCGAGGGGCACTCTTTTGAGTGTGTGG,Cys-GCA,112	2.14313	4.41718	1	1	1.07856	-1.06456	0	0	5.47199	0	0	0
tRF-+1:T17-Ser-AGA-2-2	TCTAGGATTTCTTTTTT	tRF-1	-	-	17	pre_tRNA-Ser-AGA-2-2,AGTAACAAAGGCATTGGATAAAAACGACCTCAGAGGTTCTGTAGTCGTGGCCGAGTGGTTAAGGCGATGGACTAGAAATCCATTGGGGTCTCCCCGCGCAGGTTCGAATCCTGCCGACTACGTCTAGGATTTCTTTTTTTCCCCCTCAGTTTTTGAAAGTTT,Ser-AGA,122	2.14313	4.41718	1	1	1.07856	-1.06456	0	0	5.47199	0	0	0
tRF-+1:T14-Asp-GTC-1	ACTAGTGAGTTTTT	tRF-1	-	-	14	pre_tRNA-Asp-GTC-1-1,TCTTTCTTGAGCAGCTACTTTAGGGAGCCCATCATGGTTGTCCTCGTTAGTATAGTGGTGAGTATCCCCGCCTGTCACGCGGGAGACCGGGGTTCGATTCCCCGACGGGGAGACTAGTGAGTTTTTAATCCATTTTTTATTTTCTATATTTA,Asp-GTC,112	2.14313	4.41718	1	1	1.07856	-1.06456	0	0	5.47199	0	0	0
tRF-1:14-Thr-TGT-2	GGCCCTATAGCTCA	tRF-5a	-	-	14	tRNA-Thr-TGT-2-1,GGCCCTATAGCTCAGGGGTTAGAGCACTGGTCTTGTAAACCAGGGGTCGCGAGTTCAAATCTCGCTGGGGCCTCCA,Thr-TGT,0	2.13537	4.39348	0.0145518	0.276853	5.51658	3.38122	67.6456	60.0188	32.8319	0.943109	19.4791	15.3488
tRF-+1:T14-Tyr-GTA-3-2	GTAGCCTGTCTTTT	tRF-1	-	-	14	pre_tRNA-Tyr-GTA-3-2,CTACTGAAAACCACTTTCGAAAGAGCACTGCTTGTGCTTCCCTTCGATAGCTCAGCTGGTAGAGCGGAGGACTGTAGTTACATTCGTTGCAGCCATCCTTAGGTCGCTGGTTCGATTCCGGCTCGAAGGAGTAGCCTGTCTTTTGGGCTCTCAACCCCTGAGATAAGCTG,Tyr-GTA,130	2.06544	4.18561	0.00445745	0.205599	6.62916	4.56372	39.46	140.044	180.576	6.60176	29.2186	38.3721
tRF-+1:T15-Trp-CCA-3	TCTGTGTTCTTTATT	tRF-1	-	-	15	pre_tRNA-Trp-CCA-3-1,GCTTCTGTTCACGACACCCACAATGCTCGGGCCACAGGGAGGCCTCGTGGCGCAACGGTAGCGCGTCTGACTCCAGATCAGAAGGTTGCGTGTTCAAATCACGTCGGGGTCATCTGTGTTCTTTATTTTCTAATTACCTGACCTCTTTAATA,Trp-CCA,112	2.00302	4.0084	0.000657504	0.0662692	7.13355	5.13052	124.017	200.063	180.576	16.976	35.7116	38.3721
tRF-1:23-Asp-GTC-1-M3	TCCTCGTTAGTATAGTGGTGAGT	tRF-5b	5023b	-	23	tRNA-Asp-GTC-1-1,TCCTCGTTAGTATAGTGGTGAGTATCCCCGCCTGTCACGCGGGAGACCGGGGTTCGATTCCCCGACGGGGAGCCA,Asp-GTC,0;tRNA-Asp-GTC-3-1,TCCTCGTTAGTATAGTGGTGAGTATCCCTGCCTGTCACGCAGGACACCAGGGTTCGATTTCCTGACGGGGAGCCA,Asp-GTC,0;tRNA-Asp-GTC-4-1,TCCTCGTTAGTATAGTGGTGAGTATCCCCGCCTGTCACACAGGAGACCGGGGTTCGATTCCCCGATGGGGAGCCA,Asp-GTC,0	1.89717	3.72482	0.301771	0.688661	3.36859	1.47142	0	26.675	10.944	0	3.24651	7.67442
tiRNA-1:34-Glu-CTC-1	TCCCTGGTGGTCTAGTGGTTAGGATTCGGCGCTC	tiRNA-5	-	-	34	tRNA-Glu-CTC-1-1,TCCCTGGTGGTCTAGTGGTTAGGATTCGGCGCTCTCACCGCCGCGGCCCGGGTTCGATTCCCGGTCAGGGAACCA,Glu-CTC,0	1.88842	3.70228	0.000924948	0.073203	8.37054	6.48212	219.848	533.5	454.175	28.2933	116.874	122.791
tRF-+1:T14-Ile-AAT-1-2	GTGTGCTTATCTTT	tRF-1	-	-	14	pre_tRNA-Ile-AAT-1-2,TTTATTTACATGACTTTAGAGCTCCCACTCTCTCGTCTCTGGCCGGTTAGCTCAGTTGGTTAGAGCGTGGTGCTAATAACGCCAAGGTCGCGGGTTCGATCCCCGTACGGGCCAGTGTGCTTATCTTTTTAAACAAAAGCAATTGTTCAATATT,Ile-AAT,114	1.88329	3.68917	0.299099	0.687555	2.43735	0.554054	0	13.3375	5.47199	0.943109	0	0
tRF-1:24-Val-AAC-2-M3	GTTTCCGTAGTGTAGTGGTCATCA	tRF-5b	-	-	24	tRNA-Val-AAC-2-1,GTTTCCGTAGTGTAGTGGTCATCACGCTCGCCTAACACGCGAGAGGTCCCCGGTTCGAAACCGGGCGGAAACACCA,Val-AAC,0;tRNA-Val-AAC-3-1,GTTTCCGTAGTGTAGTGGTCATCACGCTCGCCTAACACGCGAGAGGTCCCCGGTTCGAAACCGGGCGGGAACACCA,Val-AAC,0;tRNA-Val-CAC-3-1,GTTTCCGTAGTGTAGTGGTCATCACGCTCGCCTCACACGCGAGAGGTCCCCGGTTCGAAACCGGGCGGGAACACCA,Val-CAC,0	1.87778	3.67508	0.299099	0.687555	2.43183	0.554054	5.63714	0	10.944	0.943109	0	0
tRF-57:75-Pro-AGG-1-M4	AATCCCGGACGAGCCCCCA	tRF-3b	-	-	19	tRNA-Pro-AGG-1-1,GGCTCGTTGGTCTAGGGGTATGATTCTCGCTTAGGGTGCGAGAGGTCCCGGGTTCAAATCCCGGACGAGCCCCCA,Pro-AGG,56;tRNA-Pro-CGG-1-1,GGCTCGTTGGTCTAGGGGTATGATTCTCGCTTCGGGTGCGAGAGGTCCCGGGTTCAAATCCCGGACGAGCCCCCA,Pro-CGG,56;tRNA-Pro-TGG-1-1,GGCTCGTTGGTCTAGGGGTATGATTCTCGGTTTGGGTCCGAGAGGTCCCGGGTTCAAATCCCGGACGAGCCCCCA,Pro-TGG,56;tRNA-Pro-TGG-2-1,GGCTCGTTGGTCTAGGGGTATGATTCTCGCTTTGGGTGCGAGAGGTCCCGGGTTCAAATCCCGGACGAGC…	1.87157	3.65931	0.0807922	0.526575	4.09497	2.2234	22.5485	20.0063	16.416	1.88622	3.24651	7.67442
tiRNA-1:34-Glu-TTC-3	TCCCTGGTGGTCTAGTGGCTAGGATTCGGCGCTT	tiRNA-5	-	-	34	tRNA-Glu-TTC-3-1,TCCCTGGTGGTCTAGTGGCTAGGATTCGGCGCTTTCACCGCCGCGGCCCGGGTTCGATTCCCGGTCAGGGAACCA,Glu-TTC,0	1.86748	3.64894	0.0132319	0.276853	5.77144	3.90396	39.46	80.0251	76.6078	3.77244	16.2326	30.6977
tiRNA-1:34-His-GTG-2	GCCGTGATCGTATAGTGGTTAGTACTCTGCGTTG	tiRNA-5	-	-	34	tRNA-His-GTG-2-1,GCCGTGATCGTATAGTGGTTAGTACTCTGCGTTGTGGCCGCAGCAACCTCGGTTCGAATCCGAGTCACGGCACCA,His-GTG,0	1.83057	3.55678	0.0285221	0.356981	5.12436	3.29379	11.2743	73.3563	43.7759	2.82933	16.2326	7.67442
tRF-50:70-chrM.Trp-TCA	ACACAAGTTTAACTTCTGCCA	tRF-3b	-	-	21	chrM.tRNA6-TrpTCA,AGAAGTTTAGGATATACTAGTCCGCGAGCCTTCAAAGCCCTAAGAAAACACACAAGTTTAACTTCTGCCA,Trp-TCA,49	1.82999	3.55533	0.00884698	0.257435	6.3845	4.55452	95.8313	113.369	87.5518	3.77244	51.9442	15.3488
tRF-1:14-Glu-CTC-1-M4	TCCCTGGTGGTCTA	tRF-5a	-	-	14	tRNA-Glu-CTC-1-1,TCCCTGGTGGTCTAGTGGTTAGGATTCGGCGCTCTCACCGCCGCGGCCCGGGTTCGATTCCCGGTCAGGGAACCA,Glu-CTC,0;tRNA-Glu-CTC-2-1,TCCCTGGTGGTCTAGTGGTTAGGATTTGGCGCTCTCACCGCCGCGGCCTGGGTTCGATTCCCGGTCAGGGAACCA,Glu-CTC,0;tRNA-Glu-CTC-5-1,TCCCTGGTGGTCTAGTGGTTAGGCTTTGGTGCTCTCACCTCCATGGCCCAGGTTTGATTCCTGGTCAGGGAACCA,Glu-CTC,0;tRNA-Glu-TTC-3-1,TCCCTGGTGGTCTAGTGGCTAGGATTCGGCGCTTTCACCGCCGCGGCCCGGGTTCGATTCCCGGTCAGGGAAC…	1.79253	3.46423	0.00835282	0.257435	6.73245	4.93992	84.5571	193.394	109.44	9.43109	22.7256	69.0698
tRF-55:76-Phe-GAA-2	TCGATCCCGGGTTTCAGCACCA	tRF-3b	-	-	22	tRNA-Phe-GAA-2-1,GCTGAAATAGCTCAGTTGGGAGAGCGTTAGACTGAAGATCTAAAGGTCCCTGGTTCGATCCCGGGTTTCAGCACCA,Phe-GAA,54	1.77138	3.41381	0.195339	0.644155	3.13364	1.36226	5.63714	20.0063	5.47199	0	6.49302	0
tRF-1:28-chrM.Met-CAT	AGTAAGGTCAGCTAATTAAGCTATCGGG	tRF-5c	-	-	28	chrM.tRNA5-MetCAT,AGTAAGGTCAGCTAATTAAGCTATCGGGCCCATACCCCGAAAACGTTGGTTTAAATCCTTCCCGTACTACCA,Met-CAT,0	1.77138	3.41381	0.195339	0.644155	3.13364	1.36226	5.63714	20.0063	5.47199	0	6.49302	0
tRF-+1:T14-Gln-TTG-1	CACTGAACCTTTTT	tRF-1	-	-	14	pre_tRNA-Gln-TTG-1-1,GTGGCTTGAGAAGGCTGCCGGGCGCCTTAAGCCGCCAGCAGGTCCCATGGTGTAATGGTTAGCACTCTGGACTTTGAATCCAGCGATCCGAGTTCAAATCTCGGTGGGACCTCACTGAACCTTTTTTTGGCCTTAGAATCCCTGTTTTGGGG,Gln-TTG,112	1.76361	3.39546	0.147568	0.592409	3.96323	2.19962	22.5485	26.675	5.47199	2.82933	0	7.67442
tRF-29:43-Arg-TCG-1-M4	TGACTTCGGATCAGA	tRF-2	-	-	15	tRNA-Arg-TCG-1-1,GGCCGCGTGGCCTAATGGATAAGGCGTCTGACTTCGGATCAGAAGATTGCAGGTTCGAGTCCTGCCGCGGTCGCCA,Arg-TCG,28;tRNA-Arg-TCG-2-1,GACCGCGTGGCCTAATGGATAAGGCGTCTGACTTCGGATCAGAAGATTGAGGGTTCGAGTCCCTTCGTGGTCGCCA,Arg-TCG,28;tRNA-Arg-TCG-3-1,GACCACGTGGCCTAATGGATAAGGCGTCTGACTTCGGATCAGAAGATTGAGGGTTCGAATCCCTTCGTGGTTGCCA,Arg-TCG,28;tRNA-Arg-TCG-4-1,GACCACGTGGCCTAACGGATAAGGCGTCTGACTTCGGATCAGAAGATTGAGGGTTCGAATCCCTTCG…	1.76016	3.38735	0.107868	0.553325	3.91689	2.15674	11.2743	6.66876	32.8319	1.88622	6.49302	0
tRF-+1:T29-Thr-CGT-1	GCCCTCTTTCCGTGTGGATTTAAGAATTT	tRF-1	-	-	29	pre_tRNA-Thr-CGT-1-1,GCGCCAGCATAGAAGCTCGCGCGGCCGCCACCTCAACGCAGGCGCGGTGGCCAAGTGGTAAGGCGTCGGTCTCGTAAACCGAAGATCACGGGTTCGAACCCCGTCCGTGCCTGCCCTCTTTCCGTGTGGATTTAAGAATTTTTTAGGTGAGA,Thr-CGT,112	1.72433	3.30427	0.181567	0.637981	3.58295	1.85862	5.63714	20.0063	16.416	1.88622	0	7.67442
tiRNA-1:34-Lys-TTT-1	GCCCGGATAGCTCAGTCGGTAGAGCATCAGACTT	tiRNA-5	-	-	34	tRNA-Lys-TTT-1-1,GCCCGGATAGCTCAGTCGGTAGAGCATCAGACTTTTAATCTGAGGGTCCAGGGTTCAAGTCCCTGTTCGGGCGCCA,Lys-TTT,0	1.72201	3.29896	0.092593	0.536443	4.82987	3.10785	5.63714	73.3563	27.3599	3.77244	9.73953	7.67442
tiRNA-1:34-Val-CAC-2	GTTTCCGTAGTGTAGTGGTTATCACGTTCGCCTC	tiRNA-5	-	-	34	tRNA-Val-CAC-2-1,GTTTCCGTAGTGTAGTGGTTATCACGTTCGCCTCACACGCGAAAGGTCCCCGGTTCGAAACCGGGCGGAAACACCA,Val-CAC,0	1.6954	3.23867	0.112489	0.55338	4.21306	2.51766	11.2743	26.675	27.3599	1.88622	6.49302	7.67442
tRF-54:70-chrM.Trp-TCA	AAGTTTAACTTCTGCCA	tRF-3a	-	-	17	chrM.tRNA6-TrpTCA,AGAAGTTTAGGATATACTAGTCCGCGAGCCTTCAAAGCCCTAAGAAAACACACAAGTTTAACTTCTGCCA,Trp-TCA,53	1.59715	3.02545	0.0496064	0.429406	5.06079	3.46364	22.5485	53.35	43.7759	3.77244	12.986	15.3488
tRF-1:16-Ala-AGC-1-M3	GGGGGTGTAGCTCAGT	tRF-5a	-	-	16	tRNA-Ala-AGC-1-1,GGGGGTGTAGCTCAGTGGTAGAGCGCGTGCTTAGCATGCACGAGGCCCTGGGTTCGATCCCCAGCACCTCCACCA,Ala-AGC,0;tRNA-Ala-AGC-2-1,GGGGGTGTAGCTCAGTGGTAGAGCGCGTGCTTAGCATGCACGAGGCCCCGGGTTCAATCCCCGGCACCTCCACCA,Ala-AGC,0;tRNA-Ala-TGC-1-1,GGGGGTGTAGCTCAGTGGTAGAGCGCATGCTTTGCATGCATGAGGCCCCGGGTTCGATCCCCGGCACCTCCACCA,Ala-TGC,0	1.59564	3.02229	0.0335073	0.356981	5.69011	4.09447	50.7342	66.6876	65.6638	3.77244	22.7256	30.6977
tRF-1:14-Leu-CAA-1-M8	GTCAGGATGGCCGA	tRF-5a	-	-	14	tRNA-Leu-CAA-1-1,GTCAGGATGGCCGAGTGGTCTAAGGCGCCAGACTCAAGTTCTGGTCTCCCCTGGAGGCGTGGGTTCGAATCCCACTTCTGACACCA,Leu-CAA,0;tRNA-Leu-CAA-2-1,GTCAGGATGGCCGAGTGGTCTAAGGCGCCAGACTCAAGTTCTGGTCTCCGTATGGAGGCGTGGGTTCGAATCCCACTTCTGACACCA,Leu-CAA,0;tRNA-Leu-CAA-3-1,GTCAGGATGGCCGAGTGGTCTAAGGCGCCAGACTCAAGTTCTGGTCTCCGAATGGAGGCGTGGGTTCGAATCCCACTTCTGACACCA,Leu-CAA,0;tRNA-Leu-CAA-4-1,GTCAGGATGGCCGAGTGGTCTAAGGCGCCAGACTCAAG…	1.57382	2.97693	0.057598	0.454698	4.66041	3.08658	22.5485	40.0125	27.3599	2.82933	16.2326	0
tRF-+1:T14-Ser-AGA-2-2	TCTAGGATTTCTTT	tRF-1	-	-	14	pre_tRNA-Ser-AGA-2-2,AGTAACAAAGGCATTGGATAAAAACGACCTCAGAGGTTCTGTAGTCGTGGCCGAGTGGTTAAGGCGATGGACTAGAAATCCATTGGGGTCTCCCCGCGCAGGTTCGAATCCTGCCGACTACGTCTAGGATTTCTTTTTTTCCCCCTCAGTTTTTGAAAGTTT,Ser-AGA,122	1.54414	2.91629	0.293354	0.687555	3.35891	1.81477	0	20.0063	16.416	0.943109	6.49302	0
tRF-1:16-Ala-AGC-3-M8	GGGGATGTAGCTCAGT	tRF-5a	-	-	16	tRNA-Ala-AGC-3-1,GGGGATGTAGCTCAGTGGTAGAGCGCATGCTTAGCATGCATGAGGTCCTGGGTTCGATCCCCAGCATCTCCACCA,Ala-AGC,0;tRNA-Ala-AGC-8-1,GGGGATGTAGCTCAGTGGTAGAGCGCATGCTTAGCATGCATGAGGTCCTGGGTTCGATCTCCAGGTTTTTTTCCA,Ala-AGC,0;tRNA-Ala-CGC-1-1,GGGGATGTAGCTCAGTGGTAGAGCGCATGCTTCGCATGTATGAGGCCCCGGGTTCGATCCCCGGCATCTCCACCA,Ala-CGC,0;tRNA-Ala-CGC-2-1,GGGGATGTAGCTCAGTGGTAGAGCGCGCGCTTCGCATGTGTGAGGTCCCGGGTTCAATCCCCGGCATCTCCAC…	1.51955	2.86701	0.0229289	0.334437	6.85686	5.33732	112.743	233.406	76.6078	8.48798	71.4232	46.0465
tRF-+1:T24-Arg-ACG-1-3-M1-23:G>A	TTGGGACTGGTACTCCTTTATTTA	tRF-1	-	-	24	pre_tRNA-Arg-ACG-1-3,AACCTGAAGTATCGTTATTGGGCCGCACTGCAATGTCTGCGGGCCAGTGGCGCAATGGATAACGCGTCTGACTACGGATCAGAAGATTCCAGGTTCGACTCCTGGCTGGCTCGTTGGGACTGGTACTCCTTTATTTGCATCATTGGCTAATCT,Arg-ACG,113	1.51806	2.86405	0.0468645	0.420636	5.15186	3.6338	56.3714	33.3438	32.8319	6.60176	12.986	7.67442
tRF-1:16-Leu-CAG-1-M3	GTCAGGATGGCCGAGC	tRF-5a	-	-	16	tRNA-Leu-CAG-1-1,GTCAGGATGGCCGAGCGGTCTAAGGCGCTGCGTTCAGGTCGCAGTCTCCCCTGGAGGCGTGGGTTCGAATCCCACTCCTGACACCA,Leu-CAG,0;tRNA-Leu-CAG-2-1,GTCAGGATGGCCGAGCGGTCTAAGGCGCTGCGTTCAGGTCGCAGTCTCCCCTGGAGGCGTGGGTTCGAATCCCACTTCTGACACCA,Leu-CAG,0;tRNA-Leu-CAG-4-1,GTCAGGATGGCCGAGCAGTCTAAGGCACTGCGTTCAGGTCGCAGTCTCCCCTGGAGGCGTGGATTCGAATCCCACTCCTGACACCA,Leu-CAG,0	1.49887	2.82622	0.125883	0.567442	5.66009	4.16122	33.8228	126.706	27.3599	0.943109	42.2046	15.3488
tRF-+1:T16-iMet-CAT-1	TCGGAGGCTTTGTTTT	tRF-1	1020	-	16	pre_tRNA-iMet-CAT-1-1,AAGCTCTTCTATGGAAAAGAAGAGAATGCTACCAGTGGGTAGCAGAGTGGCGCAGCGGAAGCGTGCTGGGCCCATAACCCAGAGGTCGATGGATCGAAACCATCCTCTGCTATCGGAGGCTTTGTTTTTAAAATTTTGACAATCTAATTAAA,iMet-CAT,112	1.43386	2.70168	0.0154918	0.276853	7.2261	5.79225	101.468	246.744	196.992	29.2364	45.4512	69.0698
tRF-64:82-Leu-AAG-1-M4	TCGAATCCCACCGCTGCCA	tRF-3b	-	-	19	tRNA-Leu-AAG-1-1,GGTAGCGTGGCCGAGCGGTCTAAGGCGCTGGATTAAGGCTCCAGTCTCTTCGGGGGCGTGGGTTCGAATCCCACCGCTGCCACCA,Leu-AAG,63;tRNA-Leu-AAG-2-1,GGTAGTGTGGCCGAGCGGTCTAAGGCGCTGGATTAAGGCTCCAGTCTCTTCGGGGGCGTGGGTTCGAATCCCACCGCTGCCACCA,Leu-AAG,63;tRNA-Leu-TAG-1-1,GGTAGCGTGGCCGAGCGGTCTAAGGCGCTGGATTTAGGCTCCAGTCTCTTCGGAGGCGTGGGTTCGAATCCCACCGCTGCCACCA,Leu-TAG,63;tRNA-Leu-TAG-3-1,GGTAGCGTGGCCGAGTGGTCTAAGGCGCTGGATTTAGGCT…	1.38136	2.60514	0.226365	0.670905	3.92917	2.54781	5.63714	26.675	21.8879	0.943109	9.73953	7.67442
tRF-1:16-Glu-CTC-1-M4	TCCCTGGTGGTCTAGT	tRF-5a	-	-	16	tRNA-Glu-CTC-1-1,TCCCTGGTGGTCTAGTGGTTAGGATTCGGCGCTCTCACCGCCGCGGCCCGGGTTCGATTCCCGGTCAGGGAACCA,Glu-CTC,0;tRNA-Glu-CTC-2-1,TCCCTGGTGGTCTAGTGGTTAGGATTTGGCGCTCTCACCGCCGCGGCCTGGGTTCGATTCCCGGTCAGGGAACCA,Glu-CTC,0;tRNA-Glu-CTC-5-1,TCCCTGGTGGTCTAGTGGTTAGGCTTTGGTGCTCTCACCTCCATGGCCCAGGTTTGATTCCTGGTCAGGGAACCA,Glu-CTC,0;tRNA-Glu-TTC-3-1,TCCCTGGTGGTCTAGTGGCTAGGATTCGGCGCTTTCACCGCCGCGGCCCGGGTTCGATTCCCGGTCAGGGAAC…	1.3804	2.6034	0.055017	0.448226	5.85109	4.47069	56.3714	46.6813	98.4958	11.3173	16.2326	30.6977
tRF-+1:T16-Ser-AGA-2-2	TCTAGGATTTCTTTTT	tRF-1	-	-	16	pre_tRNA-Ser-AGA-2-2,AGTAACAAAGGCATTGGATAAAAACGACCTCAGAGGTTCTGTAGTCGTGGCCGAGTGGTTAAGGCGATGGACTAGAAATCCATTGGGGTCTCCCCGCGCAGGTTCGAATCCTGCCGACTACGTCTAGGATTTCTTTTTTTCCCCCTCAGTTTTTGAAAGTTT,Ser-AGA,122	1.35709	2.56168	1	1	1.91114	0.554054	0	6.66876	5.47199	0.943109	0	0
tRF-55:76-Arg-ACG-1-M2	TCGACTCCTGGCTGGCTCGCCA	tRF-3b	3030b	-	22	tRNA-Arg-ACG-1-1,GGGCCAGTGGCGCAATGGATAACGCGTCTGACTACGGATCAGAAGATTCCAGGTTCGACTCCTGGCTGGCTCGCCA,Arg-ACG,54;tRNA-Arg-ACG-3-1,GGGCCAGTGGCGCAATGGATAACGCGTCTGACTACGGATCAGAAGATTCTAGGTTCGACTCCTGGCTGGCTCGCCA,Arg-ACG,54	1.33342	2.51999	0.098004	0.542942	5.69181	4.35839	11.2743	60.0188	114.912	8.48798	29.2186	15.3488
tRF-1:16-chrM.Met-CAT	AGTAAGGTCAGCTAAT	tRF-5a	-	-	16	chrM.tRNA5-MetCAT,AGTAAGGTCAGCTAATTAAGCTATCGGGCCCATACCCCGAAAACGTTGGTTTAAATCCTTCCCGTACTACCA,Met-CAT,0	1.324	2.50359	0.167231	0.61764	5.0286	3.7046	50.7342	53.35	10.944	1.88622	29.2186	7.67442
tRF-+1:T15-Ile-AAT-1-5	GTGGTAGATTCTTTT	tRF-1	-	-	15	pre_tRNA-Ile-AAT-1-5,AAAACCTCTCCCTTATATTTTACTCCGAGCTTGTACATCTGGCCGGTTAGCTCAGTTGGTTAGAGCGTGGTGCTAATAACGCCAAGGTCGCGGGTTCGATCCCCGTACGGGCCAGTGGTAGATTCTTTTCTCTAAATCCCTAATCCAAAGTTTA,Ile-AAT,114	1.30377	2.46873	1	1	1.91114	0.607375	0	6.66876	5.47199	0	3.24651	0
tiRNA-1:34-Glu-TTC-1	TCCCACATGGTCTAGCGGTTAGGATTCCTGGTTT	tiRNA-5	-	-	34	tRNA-Glu-TTC-1-1,TCCCACATGGTCTAGCGGTTAGGATTCCTGGTTTTCACCCAGGCGGCCCGGGTTCGACTCCCGGTGTGGGAACCA,Glu-TTC,0	1.2772	2.42368	0.0784501	0.525522	5.38029	4.10309	45.0971	40.0125	60.1918	4.71554	29.2186	15.3488
tRF-27:40-Cys-GCA-1-M19	TTGACTGCAGATCA	tRF-2	-	-	14	tRNA-Cys-GCA-1-1,GGGGGTATAGCTCAGTGGTAGAGCATTTGACTGCAGATCAAGAGGTCCCTGGTTCAAATCCAGGTGCCCCCTCCA,Cys-GCA,26;tRNA-Cys-GCA-10-1,GGGGGTATAGCTCAGGGGTAGAGCATTTGACTGCAGATCAAGAGGTCCCTGGTTCAAATCCAGATGCCCCCTCCA,Cys-GCA,26;tRNA-Cys-GCA-12-1,GGGGGTATAGCTCAGGGGTAGAGCATTTGACTGCAGATCAAGAGGTCCTTGGTTCAAATCCAGGTGTCCCCTCCA,Cys-GCA,26;tRNA-Cys-GCA-13-1,GGGGGTATAGCTCAGAGGTAGAGCATTTGACTGCAGATCAAGAGATCTCTGGTTCAAATCCAGGTGC…	1.25666	2.38942	0.298904	0.687555	3.40227	2.14561	11.2743	26.675	0	1.88622	6.49302	0
tRF-54:75-Pro-AGG-1-M4	TCAAATCCCGGACGAGCCCCCA	tRF-3b	3003b	-	22	tRNA-Pro-AGG-1-1,GGCTCGTTGGTCTAGGGGTATGATTCTCGCTTAGGGTGCGAGAGGTCCCGGGTTCAAATCCCGGACGAGCCCCCA,Pro-AGG,53;tRNA-Pro-CGG-1-1,GGCTCGTTGGTCTAGGGGTATGATTCTCGCTTCGGGTGCGAGAGGTCCCGGGTTCAAATCCCGGACGAGCCCCCA,Pro-CGG,53;tRNA-Pro-TGG-1-1,GGCTCGTTGGTCTAGGGGTATGATTCTCGGTTTGGGTCCGAGAGGTCCCGGGTTCAAATCCCGGACGAGCCCCCA,Pro-TGG,53;tRNA-Pro-TGG-2-1,GGCTCGTTGGTCTAGGGGTATGATTCTCGCTTTGGGTGCGAGAGGTCCCGGGTTCAAATCCCGGACGAGC…	1.25469	2.38615	0.26957	0.687555	4.07836	2.82368	5.63714	33.3438	21.8879	1.88622	6.49302	15.3488
tRF-1:15-Thr-TGT-3	GGCTCCATAGCTCAG	tRF-5a	-	-	15	tRNA-Thr-TGT-3-1,GGCTCCATAGCTCAGGGGTTAGAGCACTGGTCTTGTAAACCAGGGGTCGCGAGTTCAAATCTCGCTGGGGCCTCCA,Thr-TGT,0	1.22534	2.3381	0.199496	0.650121	5.09992	3.87458	45.0971	66.6876	10.944	12.2604	0	15.3488
tRF-1:22-Ser-AGA-1-M3	GTAGTCGTGGCCGAGTGGTTAA	tRF-5b	-	-	22	tRNA-Ser-AGA-1-1,GTAGTCGTGGCCGAGTGGTTAAGGCGATGGACTAGAAATCCATTGGGGTTTCCCCGCGCAGGTTCGAATCCTGCCGACTACGCCA,Ser-AGA,0;tRNA-Ser-AGA-2-1,GTAGTCGTGGCCGAGTGGTTAAGGCGATGGACTAGAAATCCATTGGGGTCTCCCCGCGCAGGTTCGAATCCTGCCGACTACGCCA,Ser-AGA,0;tRNA-Ser-TGA-2-1,GTAGTCGTGGCCGAGTGGTTAAGGCGATGGACTTGAAATCCATTGGGGTTTCCCCGCGCAGGTTCGAATCCTGCCGACTACGCCA,Ser-TGA,0	1.21203	2.31663	0.199168	0.650121	4.9257	3.71367	22.5485	66.6876	21.8879	2.82933	12.986	30.6977
tRF-1:14-Ser-AGA-3	GTAGTCGTGGCCAA	tRF-5a	-	-	14	tRNA-Ser-AGA-3-1,GTAGTCGTGGCCAAGTGAGTAAGGCAATGGACTAGAAATCCATTGGGGTCTCCCAGCACAGGTTCAAATCCTGCTGACTATGCCA,Ser-AGA,0	1.20997	2.31333	0.480243	0.848305	2.45272	1.24275	0	20.0063	0	1.88622	0	0
tiRNA-1:33-Cys-GCA-10-M9	GGGGGTATAGCTCAGGGGTAGAGCATTTGACTG	tiRNA-5	-	-	33	tRNA-Cys-GCA-10-1,GGGGGTATAGCTCAGGGGTAGAGCATTTGACTGCAGATCAAGAGGTCCCTGGTTCAAATCCAGATGCCCCCTCCA,Cys-GCA,0;tRNA-Cys-GCA-12-1,GGGGGTATAGCTCAGGGGTAGAGCATTTGACTGCAGATCAAGAGGTCCTTGGTTCAAATCCAGGTGTCCCCTCCA,Cys-GCA,0;tRNA-Cys-GCA-14-1,GGGGGTATAGCTCAGGGGTAGAGCATTTGACTGCAGATCAAGAGGTCCCTAGTTCAAATCCAGGTGCCCCCTCCA,Cys-GCA,0;tRNA-Cys-GCA-24-1,GGGGGTATAGCTCAGGGGTAGAGCATTTGACTGCAGATCACGAGGTCCCTGGTTCAAATCGAGGTGCCC…	1.20708	2.3087	0.426493	0.795547	3.73574	2.52866	0	13.3375	32.8319	1.88622	6.49302	7.67442
tRF-54:72-Ala-TGC-1	TCGATCCCCGGCACCTCCA	tRF-3b	-	-	19	tRNA-Ala-TGC-1-1,GGGGGTGTAGCTCAGTGGTAGAGCGCATGCTTTGCATGCATGAGGCCCCGGGTTCGATCCCCGGCACCTCCACCA,Ala-TGC,53	1.20604	2.30703	0.237961	0.672604	4.20595	2.99991	5.63714	33.3438	27.3599	5.65865	6.49302	0
tRF-54:75-Cys-GCA-1-M11	TCAAATCCAGGTGCCCCCTCCA	tRF-3b	-	-	22	tRNA-Cys-GCA-1-1,GGGGGTATAGCTCAGTGGTAGAGCATTTGACTGCAGATCAAGAGGTCCCTGGTTCAAATCCAGGTGCCCCCTCCA,Cys-GCA,53;tRNA-Cys-GCA-11-1,GGGGGTATAGCTCAGGGGTAGAGTATTTGGCTGCAGATCAAGAGGTCCCTGGTTCAAATCCAGGTGCCCCCTCCA,Cys-GCA,53;tRNA-Cys-GCA-13-1,GGGGGTATAGCTCAGAGGTAGAGCATTTGACTGCAGATCAAGAGATCTCTGGTTCAAATCCAGGTGCCCCCTCCA,Cys-GCA,53;tRNA-Cys-GCA-14-1,GGGGGTATAGCTCAGGGGTAGAGCATTTGACTGCAGATCAAGAGGTCCCTAGTTCAAATCCAGGTGC…	1.20301	2.30219	0.377675	0.755718	3.57372	2.37071	0	26.675	16.416	3.77244	3.24651	0
tRF-58:76-Val-TAC-1	AGCCCCAGTGGAACCACCA	tRF-3b	3032a	-	19	tRNA-Val-TAC-1-1,GGTTCCATAGTGTAGCGGTTATCACGTCTGCTTTACACGCAGAAGGTCCTGGGTTCGAGCCCCAGTGGAACCACCA,Val-TAC,57	1.19528	2.2899	0.445402	0.821217	3.38608	2.1908	16.9114	6.66876	10.944	0.943109	9.73953	0
tRF-1:16-Thr-TGT-3	GGCTCCATAGCTCAGG	tRF-5a	-	-	16	tRNA-Thr-TGT-3-1,GGCTCCATAGCTCAGGGGTTAGAGCACTGGTCTTGTAAACCAGGGGTCGCGAGTTCAAATCTCGCTGGGGCCTCCA,Thr-TGT,0	1.18539	2.27425	0.361758	0.743438	3.89288	2.7075	0	13.3375	38.3039	3.77244	3.24651	7.67442
tRF-+1:T16-Cys-GCA-3-3	AGCAGGCTCACTCTTT	tRF-1	-	-	16	pre_tRNA-Cys-GCA-3-3,ACTAGCACCAAGTAGTAACTGACGCAAAGCTACCGGCAGAGGGGGTATAGCTCAGTGGTAGAGCATTTGACTGCAGATCAAGAGGTCCCCGGTTCAAATCCGGGTGCCCCCTAGCAGGCTCACTCTTTTCTTTGGAAGACCTTATTACGTCC,Cys-GCA,112	1.17379	2.25603	0.307337	0.693952	4.30356	3.12977	0	26.675	43.7759	2.82933	12.986	7.67442
tRF-56:75-Ala-CGC-1-M2	GATCCCCGGCATCTCCACCA	tRF-3b	-	-	20	tRNA-Ala-CGC-1-1,GGGGATGTAGCTCAGTGGTAGAGCGCATGCTTCGCATGTATGAGGCCCCGGGTTCGATCCCCGGCATCTCCACCA,Ala-CGC,55;tRNA-Ala-TGC-2-1,GGGGATGTAGCTCAGTGGTAGAGCGCATGCTTTGCATGTATGAGGCCCCGGGTTCGATCCCCGGCATCTCCACCA,Ala-TGC,55	1.15833	2.23199	0.330403	0.712231	3.59027	2.43194	5.63714	26.675	10.944	2.82933	6.49302	0
tRF-1:24-Glu-CTC-1-M2	TCCCTGGTGGTCTAGTGGTTAGGA	tRF-5b	-	-	24	tRNA-Glu-CTC-1-1,TCCCTGGTGGTCTAGTGGTTAGGATTCGGCGCTCTCACCGCCGCGGCCCGGGTTCGATTCCCGGTCAGGGAACCA,Glu-CTC,0;tRNA-Glu-CTC-2-1,TCCCTGGTGGTCTAGTGGTTAGGATTTGGCGCTCTCACCGCCGCGGCCTGGGTTCGATTCCCGGTCAGGGAACCA,Glu-CTC,0	1.13469	2.19572	0.614775	0.915145	3.09244	1.95774	0	6.66876	21.8879	0	6.49302	7.67442
tRF-55:75-Gly-TCC-1	CGATTCCCGGCCAACGCACCA	tRF-3b	-	-	21	tRNA-Gly-TCC-1-1,GCGTTGGTGGTATAGTGGTGAGCATAGCTGCCTTCCAAGCAGTTGACCCGGGTTCGATTCCCGGCCAACGCACCA,Gly-TCC,54	1.13044	2.18925	0.337906	0.72	3.92926	2.79882	5.63714	26.675	21.8879	2.82933	3.24651	15.3488
tRF-1:32-Gly-GCC-2-M3	GCATTGGTGGTTCAGTGGTAGAATTCTCGCCT	tRF-5c	-	-	32	tRNA-Gly-GCC-2-1,GCATTGGTGGTTCAGTGGTAGAATTCTCGCCTGCCACGCGGGAGGCCCGGGTTCGATTCCCGGCCAATGCACCA,Gly-GCC,0;tRNA-Gly-GCC-3-1,GCATTGGTGGTTCAGTGGTAGAATTCTCGCCTGCCACGCGGGAGGCCCGGGTTTGATTCCCGGCCAATGCACCA,Gly-GCC,0;tRNA-Gly-GCC-4-1,GCATTGGTGGTTCAGTGGTAGAATTCTCGCCTGCCACGCGGGAGGCCCGGGTTCGGTTCCCGGCCAATGCACCA,Gly-GCC,0	1.12915	2.18729	0.0332441	0.356981	12.4787	11.3496	4019.28	8949.47	7846.83	1109.1	2869.92	3330.7
tRF-1:32-Gly-TCC-1	GCGTTGGTGGTATAGTGGTGAGCATAGCTGCC	tRF-5c	-	-	32	tRNA-Gly-TCC-1-1,GCGTTGGTGGTATAGTGGTGAGCATAGCTGCCTTCCAAGCAGTTGACCCGGGTTCGATTCCCGGCCAACGCACCA,Gly-TCC,0	1.09564	2.13708	0.310782	0.694246	4.21861	3.12297	22.5485	13.3375	27.3599	5.65865	0	15.3488
tRF-+1:T31-Thr-CGT-1	GCCCTCTTTCCGTGTGGATTTAAGAATTTTT	tRF-1	-	-	31	pre_tRNA-Thr-CGT-1-1,GCGCCAGCATAGAAGCTCGCGCGGCCGCCACCTCAACGCAGGCGCGGTGGCCAAGTGGTAAGGCGTCGGTCTCGTAAACCGAAGATCACGGGTTCGAACCCCGTCCGTGCCTGCCCTCTTTCCGTGTGGATTTAAGAATTTTTTAGGTGAGA,Thr-CGT,112	1.07656	2.109	0.249822	0.673844	4.45365	3.37709	16.9114	33.3438	27.3599	6.60176	6.49302	7.67442
tRF-57:75-Ala-CGC-1-M4	ATCCCCGGCATCTCCACCA	tRF-3b	-	-	19	tRNA-Ala-CGC-1-1,GGGGATGTAGCTCAGTGGTAGAGCGCATGCTTCGCATGTATGAGGCCCCGGGTTCGATCCCCGGCATCTCCACCA,Ala-CGC,56;tRNA-Ala-CGC-2-1,GGGGATGTAGCTCAGTGGTAGAGCGCGCGCTTCGCATGTGTGAGGTCCCGGGTTCAATCCCCGGCATCTCCACCA,Ala-CGC,56;tRNA-Ala-TGC-2-1,GGGGATGTAGCTCAGTGGTAGAGCGCATGCTTTGCATGTATGAGGCCCCGGGTTCGATCCCCGGCATCTCCACCA,Ala-TGC,56;tRNA-Ala-TGC-4-1,GGGGATGTAGCTCAGTGGTAGAGCGCATGCTTTGCATGTATGAGGCCCCGGGTTCAATCCCCGGCATCTC…	1.07043	2.10006	0.0372245	0.373421	9.33614	8.26572	653.908	946.963	722.302	91.4816	357.116	491.163
tiRNA-1:34-Glu-TTC-2	TCCCATATGGTCTAGCGGTTAGGATTCCTGGTTT	tiRNA-5	-	-	34	tRNA-Glu-TTC-2-1,TCCCATATGGTCTAGCGGTTAGGATTCCTGGTTTTCACCCAGGCGGCCCGGGTTCGACTCCCGGTATGGGAACCA,Glu-TTC,0	1.06482	2.09191	0.473047	0.842663	3.58392	2.5191	5.63714	20.0063	16.416	1.88622	6.49302	7.67442
tRF-1:14-Ser-CGA-2	GTCACGGTGGCCGA	tRF-5a	-	-	14	tRNA-Ser-CGA-2-1,GTCACGGTGGCCGAGTGGTTAAGGCGTTGGACTCGAAATCCAATGGGGTTTCCCCGCACAGGTTCGAATCCTGTTCGTGACGCCA,Ser-CGA,0	1.0585	2.08277	0.632209	0.915977	3.3893	2.3308	11.2743	20.0063	5.47199	0.943109	3.24651	15.3488
tRF-1:22-Ala-AGC-3-M8	GGGGATGTAGCTCAGTGGTAGA	tRF-5b	-	-	22	tRNA-Ala-AGC-3-1,GGGGATGTAGCTCAGTGGTAGAGCGCATGCTTAGCATGCATGAGGTCCTGGGTTCGATCCCCAGCATCTCCACCA,Ala-AGC,0;tRNA-Ala-AGC-8-1,GGGGATGTAGCTCAGTGGTAGAGCGCATGCTTAGCATGCATGAGGTCCTGGGTTCGATCTCCAGGTTTTTTTCCA,Ala-AGC,0;tRNA-Ala-CGC-1-1,GGGGATGTAGCTCAGTGGTAGAGCGCATGCTTCGCATGTATGAGGCCCCGGGTTCGATCCCCGGCATCTCCACCA,Ala-CGC,0;tRNA-Ala-CGC-2-1,GGGGATGTAGCTCAGTGGTAGAGCGCGCGCTTCGCATGTGTGAGGTCCCGGGTTCAATCCCCGGCATCTCCAC…	1.0387	2.05438	0.365638	0.747467	3.94725	2.90855	11.2743	33.3438	10.944	1.88622	16.2326	0
tRF-1:15-Ala-TGC-6	GGGGATGTAGCTCAA	tRF-5a	-	-	15	tRNA-Ala-TGC-6-1,GGGGATGTAGCTCAATGGTAGAGCACATGCTTTGCATGTATGAGGCACCGGGTTCGATTCCCGGCATCTCCACCA,Ala-TGC,0	1.03178	2.04455	0.379177	0.755718	4.22434	3.19256	22.5485	20.0063	21.8879	1.88622	12.986	15.3488
tRF-1:32-Gly-GCC-1	GCATGGGTGGTTCAGTGGTAGAATTCTCGCCT	tRF-5c	-	-	32	tRNA-Gly-GCC-1-1,GCATGGGTGGTTCAGTGGTAGAATTCTCGCCTGCCACGCGGGAGGCCCGGGTTCGATTCCCGGCCCATGCACCA,Gly-GCC,0	1.01969	2.02748	0.04302	0.406248	10.5566	9.53695	1127.43	2180.68	2155.96	354.609	772.67	882.558
tRF-1:16-Cys-GCA-1-M3	GGGGGTATAGCTCAGT	tRF-5a	-	-	16	tRNA-Cys-GCA-1-1,GGGGGTATAGCTCAGTGGTAGAGCATTTGACTGCAGATCAAGAGGTCCCTGGTTCAAATCCAGGTGCCCCCTCCA,Cys-GCA,0;tRNA-Cys-GCA-2-1,GGGGGTATAGCTCAGTGGTAGAGCATTTGACTGCAGATCAAGAGGTCCCTGGTTCAAATCCGGGTGCCCCCTCCA,Cys-GCA,0;tRNA-Cys-GCA-3-1,GGGGGTATAGCTCAGTGGTAGAGCATTTGACTGCAGATCAAGAGGTCCCCGGTTCAAATCCGGGTGCCCCCTCCA,Cys-GCA,0	0.997934	1.99714	0.23128	0.670905	5.42573	4.42779	45.0971	26.675	76.6078	3.77244	35.7116	30.6977
tRF-1:28-Glu-TTC-1	TCCCACATGGTCTAGCGGTTAGGATTCC	tRF-5c	-	-	28	tRNA-Glu-TTC-1-1,TCCCACATGGTCTAGCGGTTAGGATTCCTGGTTTTCACCCAGGCGGCCCGGGTTCGACTCCCGGTGTGGGAACCA,Glu-TTC,0	0.976298	1.96741	0.228377	0.670905	5.62446	4.64816	11.2743	100.031	71.1358	12.2604	22.7256	30.6977
tRF-+1:T15-Ser-AGA-2-2	TCTAGGATTTCTTTT	tRF-1	-	-	15	pre_tRNA-Ser-AGA-2-2,AGTAACAAAGGCATTGGATAAAAACGACCTCAGAGGTTCTGTAGTCGTGGCCGAGTGGTTAAGGCGATGGACTAGAAATCCATTGGGGTCTCCCCGCGCAGGTTCGAATCCTGCCGACTACGTCTAGGATTTCTTTTTTTCCCCCTCAGTTTTTGAAAGTTT,Ser-AGA,122	0.960015	1.94533	0.343681	0.721209	3.5782	2.61818	11.2743	6.66876	21.8879	4.71554	3.24651	0
tRF-57:75-Ala-AGC-2-M2	ATCCCCGGCACCTCCACCA	tRF-3b	-	-	19	tRNA-Ala-AGC-2-1,GGGGGTGTAGCTCAGTGGTAGAGCGCGTGCTTAGCATGCACGAGGCCCCGGGTTCAATCCCCGGCACCTCCACCA,Ala-AGC,56;tRNA-Ala-TGC-1-1,GGGGGTGTAGCTCAGTGGTAGAGCGCATGCTTTGCATGCATGAGGCCCCGGGTTCGATCCCCGGCACCTCCACCA,Ala-TGC,56	0.944946	1.92512	0.0744303	0.51543	8.43151	7.48657	304.405	606.857	344.735	71.6763	188.298	253.256
tRF-54:75-Gln-CTG-1-M7	TCAAATCTCGGTGGGACCTCCA	tRF-3b	3007b	-	22	tRNA-Gln-CTG-1-1,GGTTCCATGGTGTAATGGTTAGCACTCTGGACTCTGAATCCAGCGACCCGAGTTCAAATCTCGGTGGGACCTCCA,Gln-CTG,53;tRNA-Gln-CTG-3-1,GGTTCCATGGTGTAATGGTTAGCACTCTGGACTCTGAATCCAGCGATCCGAGTTCAAATCTCGGTGGGACCTCCA,Gln-CTG,53;tRNA-Gln-CTG-4-1,GGTTCCATGGTGTAATGGTGAGCACTCTGGACTCTGAATCCAGCGATCCGAGTTCAAATCTCGGTGGGACCTCCA,Gln-CTG,53;tRNA-Gln-TTG-1-1,GGTCCCATGGTGTAATGGTTAGCACTCTGGACTTTGAATCCAGCGATCCGAGTTCAAATCTCGGTGGGAC…	0.93455	1.91129	0.156118	0.603086	6.89835	5.9638	39.46	233.406	169.632	24.5208	81.1628	69.0698
tRF-1:32-Asp-GTC-1-M2	TCCTCGTTAGTATAGTGGTGAGTATCCCCGCC	tRF-5c	-	-	32	tRNA-Asp-GTC-1-1,TCCTCGTTAGTATAGTGGTGAGTATCCCCGCCTGTCACGCGGGAGACCGGGGTTCGATTCCCCGACGGGGAGCCA,Asp-GTC,0;tRNA-Asp-GTC-4-1,TCCTCGTTAGTATAGTGGTGAGTATCCCCGCCTGTCACACAGGAGACCGGGGTTCGATTCCCCGATGGGGAGCCA,Asp-GTC,0	0.930383	1.90578	0.268972	0.687555	4.64356	3.71318	16.9114	26.675	43.7759	6.60176	6.49302	23.0233
tRF-59:75-iMet-CAT-1-M3	ACCATCCTCTGCTACCA	tRF-3a	-	-	17	tRNA-iMet-CAT-1-1,AGCAGAGTGGCGCAGCGGAAGCGTGCTGGGCCCATAACCCAGAGGTCGATGGATCGAAACCATCCTCTGCTACCA,iMet-CAT,58;tRNA-iMet-CAT-2-1,AGCAGAGTGGCGCAGCGGAAGCATGCTGGGCCCATAACCCAGAGGTCGATGGATCGAAACCATCCTCTGCTACCA,iMet-CAT,58;tRNA-iMet-CAT-3-1,AGCAGAGTGGCGCAGCGGAAGCGTGCTGGGCCCATAACCCAGAGGTCGATAGATCGAAACCATCCTCTGCTACCA,iMet-CAT,58	0.906351	1.8743	0.493668	0.857555	3.34041	2.43405	5.63714	0	27.3599	1.88622	9.73953	0
tRF-+1:T15-iMet-CAT-1	TCGGAGGCTTTGTTT	tRF-1	-	-	15	pre_tRNA-iMet-CAT-1-1,AAGCTCTTCTATGGAAAAGAAGAGAATGCTACCAGTGGGTAGCAGAGTGGCGCAGCGGAAGCGTGCTGGGCCCATAACCCAGAGGTCGATGGATCGAAACCATCCTCTGCTATCGGAGGCTTTGTTTTTAAAATTTTGACAATCTAATTAAA,iMet-CAT,112	0.896591	1.86166	0.0996721	0.544289	9.53701	8.64042	529.891	1060.33	1105.34	95.254	535.674	621.628
tRF-1:14-Ala-AGC-1-M3	GGGGGTGTAGCTCA	tRF-5a	-	-	14	tRNA-Ala-AGC-1-1,GGGGGTGTAGCTCAGTGGTAGAGCGCGTGCTTAGCATGCACGAGGCCCTGGGTTCGATCCCCAGCACCTCCACCA,Ala-AGC,0;tRNA-Ala-AGC-2-1,GGGGGTGTAGCTCAGTGGTAGAGCGCGTGCTTAGCATGCACGAGGCCCCGGGTTCAATCCCCGGCACCTCCACCA,Ala-AGC,0;tRNA-Ala-TGC-1-1,GGGGGTGTAGCTCAGTGGTAGAGCGCATGCTTTGCATGCATGAGGCCCCGGGTTCGATCCCCGGCACCTCCACCA,Ala-TGC,0	0.89062	1.85397	0.211755	0.656828	5.06267	4.17205	28.1857	46.6813	43.7759	12.2604	9.73953	15.3488
tRF-69:85-Ser-TGA-1	CCCTGCTCGCTGCGCCA	tRF-3a	-	-	17	tRNA-Ser-TGA-1-1,GCAGCGATGGCCGAGTGGTTAAGGCGTTGGACTTGAAATCCAATGGGGTCTCCCCGCGCAGGTTCGAACCCTGCTCGCTGCGCCA,Ser-TGA,68	0.885734	1.8477	0.592945	0.904936	3.11797	2.23224	0	20.0063	10.944	1.88622	3.24651	7.67442
tRF-55:75-Ala-TGC-1	CGATCCCCGGCACCTCCACCA	tRF-3b	-	-	21	tRNA-Ala-TGC-1-1,GGGGGTGTAGCTCAGTGGTAGAGCGCATGCTTTGCATGCATGAGGCCCCGGGTTCGATCCCCGGCACCTCCACCA,Ala-TGC,54	0.885105	1.8469	0.322433	0.708841	4.55904	3.67393	16.9114	40.0125	27.3599	1.88622	19.4791	23.0233
tRF-56:75-Ala-CGC-2-M2	AATCCCCGGCATCTCCACCA	tRF-3b	-	-	20	tRNA-Ala-CGC-2-1,GGGGATGTAGCTCAGTGGTAGAGCGCGCGCTTCGCATGTGTGAGGTCCCGGGTTCAATCCCCGGCATCTCCACCA,Ala-CGC,55;tRNA-Ala-TGC-4-1,GGGGATGTAGCTCAGTGGTAGAGCGCATGCTTTGCATGTATGAGGCCCCGGGTTCAATCCCCGGCATCTCCACCA,Ala-TGC,55	0.882791	1.84394	0.596713	0.908185	3.14995	2.26716	11.2743	20.0063	0	0.943109	6.49302	7.67442
tRF-1:31-Asp-GTC-2	TCCTCGTTAGTATAGTGGTTAGTATCCCCGC	tRF-5c	-	-	31	tRNA-Asp-GTC-2-1,TCCTCGTTAGTATAGTGGTTAGTATCCCCGCCTGTCACGCGGGAGACCGGGGTTCAATTCCCCGACGGGGAGCCA,Asp-GTC,0	0.879683	1.83997	0.450632	0.821217	3.61929	2.73961	22.5485	13.3375	5.47199	6.60176	0	0
tRF-+1:T21-Arg-ACG-1-3-M1-19:A>T	TTGGGACTGGTACTCCTTTTT	tRF-1	-	-	21	pre_tRNA-Arg-ACG-1-3,AACCTGAAGTATCGTTATTGGGCCGCACTGCAATGTCTGCGGGCCAGTGGCGCAATGGATAACGCGTCTGACTACGGATCAGAAGATTCCAGGTTCGACTCCTGGCTGGCTCGTTGGGACTGGTACTCCTTTATTTGCATCATTGGCTAATCT,Arg-ACG,113	0.864437	1.82063	0.262519	0.679172	5.0078	4.14336	33.8228	60.0188	21.8879	11.3173	16.2326	7.67442
tRF-60:77-Asn-GTT-2-M2	GCCCACCCAGGGACGCCA	tRF-3a	-	-	18	tRNA-Asn-GTT-2-1,GTCTCTGTGGCGCAATTGGTTAGCGCGTTCGGCTGTTAACCGAAAGGTTGGTGGTTCAAGCCCACCCAGGGACGCCA,Asn-GTT,59;tRNA-Asn-GTT-3-1,GTCTCTGTGGCGCAATCGGTTAGCGCGTTCGGCTGTTAACCGAAAGGTTGGTGGTTCGAGCCCACCCAGGGACGCCA,Asn-GTT,59	0.838715	1.78846	0.661193	0.919427	3.60351	2.7648	22.5485	6.66876	10.944	1.88622	9.73953	7.67442
tRF-55:75-Ala-CGC-1-M2	CGATCCCCGGCATCTCCACCA	tRF-3b	-	-	21	tRNA-Ala-CGC-1-1,GGGGATGTAGCTCAGTGGTAGAGCGCATGCTTCGCATGTATGAGGCCCCGGGTTCGATCCCCGGCATCTCCACCA,Ala-CGC,54;tRNA-Ala-TGC-2-1,GGGGATGTAGCTCAGTGGTAGAGCGCATGCTTTGCATGTATGAGGCCCCGGGTTCGATCCCCGGCATCTCCACCA,Ala-TGC,54	0.827698	1.77485	0.27206	0.687555	5.29093	4.46323	56.3714	60.0188	21.8879	8.48798	38.9581	7.67442
tRF-1:32-Lys-TTT-1	GCCCGGATAGCTCAGTCGGTAGAGCATCAGAC	tRF-5c	-	-	32	tRNA-Lys-TTT-1-1,GCCCGGATAGCTCAGTCGGTAGAGCATCAGACTTTTAATCTGAGGGTCCAGGGTTCAAGTCCCTGTTCGGGCGCCA,Lys-TTT,0	0.817033	1.76178	0.202082	0.650891	6.05415	5.23712	50.7342	113.369	76.6078	19.8053	25.9721	53.7209
tRF-60:76-Arg-TCG-1	TCCTGCCGCGGTCGCCA	tRF-3a	-	-	17	tRNA-Arg-TCG-1-1,GGCCGCGTGGCCTAATGGATAAGGCGTCTGACTTCGGATCAGAAGATTGCAGGTTCGAGTCCTGCCGCGGTCGCCA,Arg-TCG,59	0.801791	1.74326	0.227308	0.670905	5.12924	4.32745	28.1857	46.6813	49.2479	9.43109	29.2186	7.67442
tRF-1:32-Cys-GCA-10-M9	GGGGGTATAGCTCAGGGGTAGAGCATTTGACT	tRF-5c	-	-	32	tRNA-Cys-GCA-10-1,GGGGGTATAGCTCAGGGGTAGAGCATTTGACTGCAGATCAAGAGGTCCCTGGTTCAAATCCAGATGCCCCCTCCA,Cys-GCA,0;tRNA-Cys-GCA-12-1,GGGGGTATAGCTCAGGGGTAGAGCATTTGACTGCAGATCAAGAGGTCCTTGGTTCAAATCCAGGTGTCCCCTCCA,Cys-GCA,0;tRNA-Cys-GCA-14-1,GGGGGTATAGCTCAGGGGTAGAGCATTTGACTGCAGATCAAGAGGTCCCTAGTTCAAATCCAGGTGCCCCCTCCA,Cys-GCA,0;tRNA-Cys-GCA-24-1,GGGGGTATAGCTCAGGGGTAGAGCATTTGACTGCAGATCACGAGGTCCCTGGTTCAAATCGAGGTGCCC…	0.790548	1.72973	0.234938	0.670905	6.04354	5.25299	39.46	106.7	93.0238	11.3173	61.6837	38.3721
tRF-+1:T24-Arg-ACG-1-3-M1-23:G>T	TTGGGACTGGTACTCCTTTATTTT	tRF-1	-	-	24	pre_tRNA-Arg-ACG-1-3,AACCTGAAGTATCGTTATTGGGCCGCACTGCAATGTCTGCGGGCCAGTGGCGCAATGGATAACGCGTCTGACTACGGATCAGAAGATTCCAGGTTCGACTCCTGGCTGGCTCGTTGGGACTGGTACTCCTTTATTTGCATCATTGGCTAATCT,Arg-ACG,113	0.788732	1.72756	0.137457	0.578983	8.57543	7.7867	270.583	573.513	541.727	79.2211	298.679	260.93
tRF-1:14-Cys-GCA-8	GGGGGCATAGCTCA	tRF-5a	-	-	14	tRNA-Cys-GCA-8-1,GGGGGCATAGCTCAGGGGTAGAGCATTTGACTGCAGATCAAGAGGTCCCCGGTTCAAATCCGGGTGCTCCCTCCA,Cys-GCA,0	0.772736	1.70851	0.662871	0.919427	3.35992	2.58718	11.2743	0	21.8879	2.82933	0	15.3488
tiRNA-1:34-Val-AAC-1	GTTTCCGTAGTGTAGTGGTTATCACGTTCGCCTA	tiRNA-5	-	-	34	tRNA-Val-AAC-1-1,GTTTCCGTAGTGTAGTGGTTATCACGTTCGCCTAACACGCGAAAGGTCCCCGGTTCGAAACCGGGCGGAAACACCA,Val-AAC,0	0.756612	1.68952	0.811035	1	3.11878	2.36217	11.2743	0	16.416	0.943109	3.24651	15.3488
tRF-59:76-Arg-TCG-1	GTCCTGCCGCGGTCGCCA	tRF-3a	-	-	18	tRNA-Arg-TCG-1-1,GGCCGCGTGGCCTAATGGATAAGGCGTCTGACTTCGGATCAGAAGATTGCAGGTTCGAGTCCTGCCGCGGTCGCCA,Arg-TCG,58	0.749942	1.68173	0.515951	0.863327	4.06389	3.31395	5.63714	20.0063	32.8319	1.88622	19.4791	7.67442
tRF-1:31-Gly-GCC-2-M3	GCATTGGTGGTTCAGTGGTAGAATTCTCGCC	tRF-5c	5004b	-	31	tRNA-Gly-GCC-2-1,GCATTGGTGGTTCAGTGGTAGAATTCTCGCCTGCCACGCGGGAGGCCCGGGTTCGATTCCCGGCCAATGCACCA,Gly-GCC,0;tRNA-Gly-GCC-3-1,GCATTGGTGGTTCAGTGGTAGAATTCTCGCCTGCCACGCGGGAGGCCCGGGTTTGATTCCCGGCCAATGCACCA,Gly-GCC,0;tRNA-Gly-GCC-4-1,GCATTGGTGGTTCAGTGGTAGAATTCTCGCCTGCCACGCGGGAGGCCCGGGTTCGGTTCCCGGCCAATGCACCA,Gly-GCC,0	0.727847	1.65617	0.190832	0.644155	14.459	13.7312	21071.6	29976.1	29888	8499.3	13349.7	11327.4
tRF-60:76-Lys-TTT-1	TCCCTGTTCGGGCGCCA	tRF-3a	-	-	17	tRNA-Lys-TTT-1-1,GCCCGGATAGCTCAGTCGGTAGAGCATCAGACTTTTAATCTGAGGGTCCAGGGTTCAAGTCCCTGTTCGGGCGCCA,Lys-TTT,59	0.715472	1.64202	0.225906	0.670905	6.85704	6.14157	67.6456	160.05	191.52	31.1226	77.9163	84.4186
tRF-59:77-Gly-ACC-1-M6	AAACCGGGCGGAAACACCA	tRF-3b	-	-	19	tRNA-Gly-ACC-1-1,GTTTCCGTAGTGTAGTGGTTAGCGCGTTCGCCTACCAAAGCGAAAGGTCCCCGGTTCGAAACCGGGCGGAAACACCA,Gly-ACC,58;tRNA-Val-AAC-1-1,GTTTCCGTAGTGTAGTGGTTATCACGTTCGCCTAACACGCGAAAGGTCCCCGGTTCGAAACCGGGCGGAAACACCA,Val-AAC,57;tRNA-Val-AAC-2-1,GTTTCCGTAGTGTAGTGGTCATCACGCTCGCCTAACACGCGAGAGGTCCCCGGTTCGAAACCGGGCGGAAACACCA,Val-AAC,57;tRNA-Val-AAC-5-1,GTTTCCGTAGTGTAGTGGTTATCACATTCGCCTAACACGCGAAAGGTCCCCGGTTCGAAACCGGGC…	0.713551	1.63983	0.641468	0.919427	3.38472	2.67117	5.63714	26.675	5.47199	2.82933	9.73953	0
tRF-54:75-His-GTG-2-M2	TCGAATCCGAGTCACGGCACCA	tRF-3b	3023b	-	22	tRNA-His-GTG-2-1,GCCGTGATCGTATAGTGGTTAGTACTCTGCGTTGTGGCCGCAGCAACCTCGGTTCGAATCCGAGTCACGGCACCA,His-GTG,53;tRNA-His-GTG-3-1,GCCGTGATCGTATAGGGGTTAGTACTCTGCGTTGTGGCCGCAGCAACCTCGGTTCGAATCCGAGTCACGGCACCA,His-GTG,53	0.706696	1.63206	0.580369	0.890898	4.18211	3.47541	5.63714	13.3375	43.7759	3.77244	3.24651	30.6977
tRF-57:76-Tyr-GTA-2-M2	GATTCCGGCTCGAAGGACCA	tRF-3b	-	-	20	tRNA-Tyr-GTA-2-1,CCTTCGATAGCTCAGTTGGTAGAGCGGAGGACTGTAGATCCTTAGGTCGCTGGTTCGATTCCGGCTCGAAGGACCA,Tyr-GTA,56;tRNA-Tyr-GTA-3-1,CCTTCGATAGCTCAGCTGGTAGAGCGGAGGACTGTAGATCCTTAGGTCGCTGGTTCGATTCCGGCTCGAAGGACCA,Tyr-GTA,56	0.691	1.6144	0.64898	0.919427	3.38507	2.69407	5.63714	26.675	5.47199	1.88622	12.986	0
tRF-+1:T32-Thr-CGT-1	GCCCTCTTTCCGTGTGGATTTAAGAATTTTTT	tRF-1	-	-	32	pre_tRNA-Thr-CGT-1-1,GCGCCAGCATAGAAGCTCGCGCGGCCGCCACCTCAACGCAGGCGCGGTGGCCAAGTGGTAAGGCGTCGGTCTCGTAAACCGAAGATCACGGGTTCGAACCCCGTCCGTGCCTGCCCTCTTTCCGTGTGGATTTAAGAATTTTTTAGGTGAGA,Thr-CGT,112	0.685429	1.60818	0.543433	0.867613	3.78395	3.09852	16.9114	20.0063	10.944	4.71554	6.49302	7.67442
tRF-1:16-Ala-CGC-3-M3	GGGGATGTAGCTCAGA	tRF-5a	-	-	16	tRNA-Ala-CGC-3-1,GGGGATGTAGCTCAGAGGTAGAGCACATGCTTCGCATGTGTGTGGTCCCGGGTTCGACTCCCGGCATCTCCACCA,Ala-CGC,0;tRNA-Ala-CGC-6-1,GGGGATGTAGCTCAGAGGTAGAGCACATGCTTCGCATGTGTGTGGTCCCGGGTTCGACTCCCAGCATCTCCACCA,Ala-CGC,0;tRNA-Ala-CGC-7-1,GGGGATGTAGCTCAGAGGTAGAGCACGTGCTTCGCATGTGTGTGGTCCCGGGGTTCGATTCCCGGCATCTCCACCA,Ala-CGC,0	0.685128	1.60784	0.607945	0.912741	3.95103	3.2659	16.9114	26.675	10.944	6.60176	0	15.3488
tiRNA-1:33-Gly-GCC-1	GCATGGGTGGTTCAGTGGTAGAATTCTCGCCTG	tiRNA-5	-	-	33	tRNA-Gly-GCC-1-1,GCATGGGTGGTTCAGTGGTAGAATTCTCGCCTGCCACGCGGGAGGCCCGGGTTCGATTCCCGGCCCATGCACCA,Gly-GCC,0	0.682322	1.60472	0.21666	0.656828	8.77203	8.08971	242.397	726.894	634.75	88.6522	405.814	306.977
tRF-56:77-Gly-ACC-1-M6	TCGAAACCGGGCGGAAACACCA	tRF-3b	3009b	-	22	tRNA-Gly-ACC-1-1,GTTTCCGTAGTGTAGTGGTTAGCGCGTTCGCCTACCAAAGCGAAAGGTCCCCGGTTCGAAACCGGGCGGAAACACCA,Gly-ACC,55;tRNA-Val-AAC-1-1,GTTTCCGTAGTGTAGTGGTTATCACGTTCGCCTAACACGCGAAAGGTCCCCGGTTCGAAACCGGGCGGAAACACCA,Val-AAC,54;tRNA-Val-AAC-2-1,GTTTCCGTAGTGTAGTGGTCATCACGCTCGCCTAACACGCGAGAGGTCCCCGGTTCGAAACCGGGCGGAAACACCA,Val-AAC,54;tRNA-Val-AAC-5-1,GTTTCCGTAGTGTAGTGGTTATCACATTCGCCTAACACGCGAAAGGTCCCCGGTTCGAAACCGGGC…	0.667831	1.58868	0.380392	0.755718	5.84139	5.17356	56.3714	26.675	114.912	11.3173	55.1907	38.3721
tRF-1:15-Ser-TGA-1	GCAGCGATGGCCGAG	tRF-5a	-	-	15	tRNA-Ser-TGA-1-1,GCAGCGATGGCCGAGTGGTTAAGGCGTTGGACTTGAAATCCAATGGGGTCTCCCCGCGCAGGTTCGAACCCTGCTCGCTGCGCCA,Ser-TGA,0	0.653995	1.57352	0.80439	1	3.14935	2.49536	11.2743	20.0063	0	2.82933	3.24651	7.67442
tRF-1:23-Gly-TCC-1	GCGTTGGTGGTATAGTGGTGAGC	tRF-5b	5008a	-	23	tRNA-Gly-TCC-1-1,GCGTTGGTGGTATAGTGGTGAGCATAGCTGCCTTCCAAGCAGTTGACCCGGGTTCGATTCCCGGCCAACGCACCA,Gly-TCC,0	0.653909	1.57343	0.514527	0.863327	2.82032	2.16641	5.63714	6.66876	10.944	1.88622	6.49302	0
tRF-58:75-Pro-AGG-1-M4	ATCCCGGACGAGCCCCCA	tRF-3a	3003a	-	18	tRNA-Pro-AGG-1-1,GGCTCGTTGGTCTAGGGGTATGATTCTCGCTTAGGGTGCGAGAGGTCCCGGGTTCAAATCCCGGACGAGCCCCCA,Pro-AGG,57;tRNA-Pro-CGG-1-1,GGCTCGTTGGTCTAGGGGTATGATTCTCGCTTCGGGTGCGAGAGGTCCCGGGTTCAAATCCCGGACGAGCCCCCA,Pro-CGG,57;tRNA-Pro-TGG-1-1,GGCTCGTTGGTCTAGGGGTATGATTCTCGGTTTGGGTCCGAGAGGTCCCGGGTTCAAATCCCGGACGAGCCCCCA,Pro-TGG,57;tRNA-Pro-TGG-2-1,GGCTCGTTGGTCTAGGGGTATGATTCTCGCTTTGGGTGCGAGAGGTCCCGGGTTCAAATCCCGGACGAGC…	0.65071	1.56994	0.2484	0.673844	7.71863	7.06792	140.928	366.782	262.655	49.0417	207.777	122.791
tRF-1:14-Ser-GCT-1-M4	GACGAGGTGGCCGA	tRF-5a	-	-	14	tRNA-Ser-GCT-1-1,GACGAGGTGGCCGAGTGGTTAAGGCGATGGACTGCTAATCCATTGTGCTCTGCACGCGTGGGTTCGAATCCCACCTTCGTCGCCA,Ser-GCT,0;tRNA-Ser-GCT-2-1,GACGAGGTGGCCGAGTGGTTAAGGCGATGGACTGCTAATCCATTGTGCTCTGCACGCATGGGTTCGAATCCCATCCTCGTCGCCA,Ser-GCT,0;tRNA-Ser-GCT-3-1,GACGAGGTGGCCGAGTGGTTAAGGCGATGGACTGCTAATCCATTGTGCTTTGCACGCGTGGGTTCGAATCCCATCCTCGTCGCCA,Ser-GCT,0;tRNA-Ser-GCT-4-1,GACGAGGTGGCCGAGTGGTTAAGGCGATGGACTGCTAATCCAT…	0.650117	1.5693	0.209018	0.65535	8.5551	7.90499	298.768	626.863	443.231	99.0264	256.474	322.326
tRF-1:24-Ile-AAT-1-M4	GGCCGGTTAGCTCAGTTGGTTAGA	tRF-5b	-	-	24	tRNA-Ile-AAT-1-1,GGCCGGTTAGCTCAGTTGGTTAGAGCGTGGTGCTAATAACGCCAAGGTCGCGGGTTCGATCCCCGTACGGGCCACCA,Ile-AAT,0;tRNA-Ile-AAT-2-1,GGCCGGTTAGCTCAGTTGGTTAGAGCATGGTGCTAATAACGCCAAGGTCACGGGTTCGATCCCCGTATGGGCCACCA,Ile-AAT,0;tRNA-Ile-AAT-3-1,GGCCGGTTAGCTCAGTTGGTTAGAGTGTGGTGCTAATAACGCCAAGGTCGCGGGTTCGATCCCCGTACGGGCCACCA,Ile-AAT,0;tRNA-Ile-AAT-4-1,GGCCGGTTAGCTCAGTTGGTTAGAGCATGGTGCTAATAACGCCAAGGTTGTGGGTTCGATGCCCGTA…	0.635162	1.55311	0.677187	0.924044	3.61558	2.98042	5.63714	40.0125	0	8.48798	0	0
tRF-+1:T30-Thr-CGT-1	GCCCTCTTTCCGTGTGGATTTAAGAATTTT	tRF-1	1035	-	30	pre_tRNA-Thr-CGT-1-1,GCGCCAGCATAGAAGCTCGCGCGGCCGCCACCTCAACGCAGGCGCGGTGGCCAAGTGGTAAGGCGTCGGTCTCGTAAACCGAAGATCACGGGTTCGAACCCCGTCCGTGCCTGCCCTCTTTCCGTGTGGATTTAAGAATTTTTTAGGTGAGA,Thr-CGT,112	0.61838	1.53515	0.634901	0.915977	3.92975	3.31137	0	40.0125	16.416	4.71554	6.49302	15.3488
tRF-1:23-Val-AAC-2-M3	GTTTCCGTAGTGTAGTGGTCATC	tRF-5b	-	-	23	tRNA-Val-AAC-2-1,GTTTCCGTAGTGTAGTGGTCATCACGCTCGCCTAACACGCGAGAGGTCCCCGGTTCGAAACCGGGCGGAAACACCA,Val-AAC,0;tRNA-Val-AAC-3-1,GTTTCCGTAGTGTAGTGGTCATCACGCTCGCCTAACACGCGAGAGGTCCCCGGTTCGAAACCGGGCGGGAACACCA,Val-AAC,0;tRNA-Val-CAC-3-1,GTTTCCGTAGTGTAGTGGTCATCACGCTCGCCTCACACGCGAGAGGTCCCCGGTTCGAAACCGGGCGGGAACACCA,Val-CAC,0	0.617748	1.53448	0.385482	0.757295	5.0577	4.43996	33.8228	26.675	54.7199	11.3173	19.4791	23.0233
tRF-+1:T14-Asn-GTT-3-9	GTCTCGGCCTTTTT	tRF-1	-	-	14	pre_tRNA-Asn-GTT-3-9,ACTATTGACTCGGCTCTCTGCCTCACAAACAACTGTCACCGTCTCTGTGGCGCAATCGGTTAGCGCGTTCGGCTGTTAACCGAAAGGTTGGTGGTTCGAGCCCACCCAGGGACGGTCTCGGCCTTTTTTTTTTTTTTTTAAATCGCAAATGCTC,Asn-GTT,114	0.609735	1.52598	1	1	1.92603	1.31629	0	13.3375	0	0.943109	3.24651	0
tRF-59:76-Phe-GAA-1-M3	TCCCGGGTTTCGGCACCA	tRF-3a	-	-	18	tRNA-Phe-GAA-1-1,GCCGAAATAGCTCAGTTGGGAGAGCGTTAGACTGAAGATCTAAAGGTCCCTGGTTCGATCCCGGGTTTCGGCACCA,Phe-GAA,58;tRNA-Phe-GAA-3-1,GCCGAAATAGCTCAGTTGGGAGAGCGTTAGACTGAAGATCTAAAGGTCCCTGGTTCAATCCCGGGTTTCGGCACCA,Phe-GAA,58;tRNA-Ser-GGA-1-1,GCTGAAATAGCTCAGTTGGGAGAGCATTAGACTGGAGATCTAAAGGTCCCTGGTTTGATCCCGGGTTTCGGCACCA,Ser-GGA,58	0.603635	1.51954	0.298386	0.687555	8.15411	7.55048	174.751	473.482	393.983	46.2123	249.981	291.628
tRF-56:75-Pro-AGG-1-M4	AAATCCCGGACGAGCCCCCA	tRF-3b	-	-	20	tRNA-Pro-AGG-1-1,GGCTCGTTGGTCTAGGGGTATGATTCTCGCTTAGGGTGCGAGAGGTCCCGGGTTCAAATCCCGGACGAGCCCCCA,Pro-AGG,55;tRNA-Pro-CGG-1-1,GGCTCGTTGGTCTAGGGGTATGATTCTCGCTTCGGGTGCGAGAGGTCCCGGGTTCAAATCCCGGACGAGCCCCCA,Pro-CGG,55;tRNA-Pro-TGG-1-1,GGCTCGTTGGTCTAGGGGTATGATTCTCGGTTTGGGTCCGAGAGGTCCCGGGTTCAAATCCCGGACGAGCCCCCA,Pro-TGG,55;tRNA-Pro-TGG-2-1,GGCTCGTTGGTCTAGGGGTATGATTCTCGCTTTGGGTGCGAGAGGTCCCGGGTTCAAATCCCGGACGAGC…	0.59999	1.51571	0.810137	1	3.12761	2.52762	0	26.675	5.47199	1.88622	6.49302	7.67442
tRF-60:76-Phe-GAA-1-M3	CCCGGGTTTCGGCACCA	tRF-3a	3051a	-	17	tRNA-Phe-GAA-1-1,GCCGAAATAGCTCAGTTGGGAGAGCGTTAGACTGAAGATCTAAAGGTCCCTGGTTCGATCCCGGGTTTCGGCACCA,Phe-GAA,59;tRNA-Phe-GAA-3-1,GCCGAAATAGCTCAGTTGGGAGAGCGTTAGACTGAAGATCTAAAGGTCCCTGGTTCAATCCCGGGTTTCGGCACCA,Phe-GAA,59;tRNA-Ser-GGA-1-1,GCTGAAATAGCTCAGTTGGGAGAGCATTAGACTGGAGATCTAAAGGTCCCTGGTTTGATCCCGGGTTTCGGCACCA,Ser-GGA,59	0.596497	1.51204	0.253167	0.673844	11.2459	10.6494	1685.5	3467.75	3671.7	555.491	2051.79	2102.79
tRF-1:15-Val-AAC-4-M3	GTTTCTGTAGTGTAG	tRF-5a	-	-	15	tRNA-Val-AAC-4-1,GTTTCTGTAGTGTAGTGGTTATCACGCTCGCCTAACACGCGAGAGGTCCCCGGTTCGAAACCGGGCAGAAACACCA,Val-AAC,0;tRNA-Val-CAC-4-1,GTTTCTGTAGTGTAGTGGTTATCACGTTCGCCTCACACGCGAAAGGTCCCCGGTTCGAAACCGGGCAGAAACACCA,Val-CAC,0;tRNA-Val-CAC-7-1,GTTTCTGTAGTGTAGTGGTTTCACATTTGCCTCACATGCAAAAGGTCCCCGGTTCTCAACCGGGCAGAAACACCA,Val-CAC,0	0.594851	1.51032	1	1	1.91114	1.31629	0	6.66876	5.47199	0.943109	3.24651	0
tRF-68:85-Ser-CGA-1-M2	ATCCTGCTCACAGCGCCA	tRF-3a	3026a	-	18	tRNA-Ser-CGA-1-1,GCTGTGATGGCCGAGTGGTTAAGGCGTTGGACTCGAAATCCAATGGGGTCTCCCCGCGCAGGTTCGAATCCTGCTCACAGCGCCA,Ser-CGA,67;tRNA-Ser-CGA-3-1,GCTGTGATGGCCGAGTGGTTAAGGCGTTGGACTCGAAATCCAATGGGTTCTTCCCGCGCAGGTTCAAATCCTGCTCACAGCGCCA,Ser-CGA,67	0.593459	1.50886	0.519038	0.863327	5.50764	4.91418	22.5485	40.0125	98.4958	3.77244	68.1767	23.0233
tiRNA-1:33-Gly-GCC-2-M3	GCATTGGTGGTTCAGTGGTAGAATTCTCGCCTG	tiRNA-5	-	-	33	tRNA-Gly-GCC-2-1,GCATTGGTGGTTCAGTGGTAGAATTCTCGCCTGCCACGCGGGAGGCCCGGGTTCGATTCCCGGCCAATGCACCA,Gly-GCC,0;tRNA-Gly-GCC-3-1,GCATTGGTGGTTCAGTGGTAGAATTCTCGCCTGCCACGCGGGAGGCCCGGGTTTGATTCCCGGCCAATGCACCA,Gly-GCC,0;tRNA-Gly-GCC-4-1,GCATTGGTGGTTCAGTGGTAGAATTCTCGCCTGCCACGCGGGAGGCCCGGGTTCGGTTCCCGGCCAATGCACCA,Gly-GCC,0	0.578415	1.49321	0.283815	0.687555	11.2187	10.6403	1786.97	3421.07	3436.41	569.638	2675.12	1335.35
tRF-1:16-Ala-TGC-5	GGGGATGTAGCTCAGC	tRF-5a	-	-	16	tRNA-Ala-TGC-5-1,GGGGATGTAGCTCAGCGGTAGAGCACATGCTTTGCATGTATGGGGTCCCGGGTTCGATTCCCGGCATCTCCACCA,Ala-TGC,0	0.570182	1.48471	0.89257	1	3.89775	3.32757	0	20.0063	32.8319	0	9.73953	30.6977
tRF-57:75-Ala-AGC-1	ATCCCCAGCACCTCCACCA	tRF-3b	-	-	19	tRNA-Ala-AGC-1-1,GGGGGTGTAGCTCAGTGGTAGAGCGCGTGCTTAGCATGCACGAGGCCCTGGGTTCGATCCCCAGCACCTCCACCA,Ala-AGC,56	0.545963	1.45999	0.329983	0.712231	8.11752	7.57156	197.3	526.832	295.487	63.1883	201.284	306.977
tRF-+1:T19-Arg-ACG-1-3	TTGGGACTGGTACTCCTTT	tRF-1	-	-	19	pre_tRNA-Arg-ACG-1-3,AACCTGAAGTATCGTTATTGGGCCGCACTGCAATGTCTGCGGGCCAGTGGCGCAATGGATAACGCGTCTGACTACGGATCAGAAGATTCCAGGTTCGACTCCTGGCTGGCTCGTTGGGACTGGTACTCCTTTATTTGCATCATTGGCTAATCT,Arg-ACG,113	0.544374	1.45839	0.286266	0.687555	9.77425	9.22988	558.077	1407.11	1236.67	229.175	795.395	690.698
tRF-+1:T14-Gly-TCC-1-7	ACGGCAAACCTTTT	tRF-1	-	-	14	pre_tRNA-Gly-TCC-1-7,ATGCATATAAATATGATCCCTGCAAGGATTTCTTCTGCATGCGTTGGTGGTATAGTGGTGAGCATAGCTGCCTTCCAAGCAGTTGACCCGGGTTCGATTCCCGGCCAACGCAACGGCAAACCTTTTCTTACCGAAATCAGTGCGTCTGAAAT,Gly-TCC,112	0.541229	1.45521	1	1	1.09528	0.554054	0	6.66876	0	0.943109	0	0
tRF-58:75-Trp-CCA-1-M5	ATCACGTCGGGGTCACCA	tRF-3a	3002a	-	18	tRNA-Trp-CCA-1-1,GACCTCGTGGCGCAATGGTAGCGCGTCTGACTCCAGATCAGAAGGTTGCGTGTTCAAATCACGTCGGGGTCACCA,Trp-CCA,57;tRNA-Trp-CCA-2-1,GACCTCGTGGCGCAACGGTAGCGCGTCTGACTCCAGATCAGAAGGCTGCGTGTTCGAATCACGTCGGGGTCACCA,Trp-CCA,57;tRNA-Trp-CCA-3-1,GGCCTCGTGGCGCAACGGTAGCGCGTCTGACTCCAGATCAGAAGGTTGCGTGTTCAAATCACGTCGGGGTCACCA,Trp-CCA,57;tRNA-Trp-CCA-4-1,GACCTCGTGGCGCAACGGTAGCGCGTCTGACTCCAGATCAGAAGGTTGCGTGTTCAAATCACGTCGGGGT…	0.539875	1.45385	0.362325	0.743438	6.97844	6.43857	95.8313	153.381	202.463	27.3502	116.874	115.116
tRF-+1:T16-Asp-GTC-1-13	AGTGATCTCTATTTTT	tRF-1	-	-	16	pre_tRNA-Asp-GTC-1-13,AAACTTCCAGTACTGTCCCTGAACTACTTGCACTGCCTCATCCTCGTTAGTATAGTGGTGAGTATCCCCGCCTGTCACGCGGGAGACCGGGGTTCGATTCCCCGACGGGGAGAGTGATCTCTATTTTTAAGTATATTCCCTCCTAAAAGTTT,Asp-GTC,112	0.524509	1.43844	1	1	1.07856	0.554054	0	0	5.47199	0.943109	0	0
tRF-1:24-Leu-CAG-1-M2	GTCAGGATGGCCGAGCGGTCTAAG	tRF-5b	5017b	-	24	tRNA-Leu-CAG-1-1,GTCAGGATGGCCGAGCGGTCTAAGGCGCTGCGTTCAGGTCGCAGTCTCCCCTGGAGGCGTGGGTTCGAATCCCACTCCTGACACCA,Leu-CAG,0;tRNA-Leu-CAG-2-1,GTCAGGATGGCCGAGCGGTCTAAGGCGCTGCGTTCAGGTCGCAGTCTCCCCTGGAGGCGTGGGTTCGAATCCCACTTCTGACACCA,Leu-CAG,0	0.519006	1.43297	0.622761	0.915145	4.6614	4.1424	33.8228	20.0063	32.8319	3.77244	19.4791	38.3721
tRF-+1:T20-Arg-ACG-1-3-M1-19:A>T	TTGGGACTGGTACTCCTTTT	tRF-1	-	-	20	pre_tRNA-Arg-ACG-1-3,AACCTGAAGTATCGTTATTGGGCCGCACTGCAATGTCTGCGGGCCAGTGGCGCAATGGATAACGCGTCTGACTACGGATCAGAAGATTCCAGGTTCGACTCCTGGCTGGCTCGTTGGGACTGGTACTCCTTTATTTGCATCATTGGCTAATCT,Arg-ACG,113	0.509862	1.42391	0.404684	0.765171	6.93348	6.42362	62.0085	260.081	131.328	33.9519	120.121	84.4186
tRF-1:16-Gly-ACC-1-M8	GTTTCCGTAGTGTAGT	tRF-5a	-	-	16	tRNA-Gly-ACC-1-1,GTTTCCGTAGTGTAGTGGTTAGCGCGTTCGCCTACCAAAGCGAAAGGTCCCCGGTTCGAAACCGGGCGGAAACACCA,Gly-ACC,0;tRNA-Val-AAC-1-1,GTTTCCGTAGTGTAGTGGTTATCACGTTCGCCTAACACGCGAAAGGTCCCCGGTTCGAAACCGGGCGGAAACACCA,Val-AAC,0;tRNA-Val-AAC-2-1,GTTTCCGTAGTGTAGTGGTCATCACGCTCGCCTAACACGCGAGAGGTCCCCGGTTCGAAACCGGGCGGAAACACCA,Val-AAC,0;tRNA-Val-AAC-3-1,GTTTCCGTAGTGTAGTGGTCATCACGCTCGCCTAACACGCGAGAGGTCCCCGGTTCGAAACCGGGCGGG…	0.500693	1.41489	0.457687	0.827487	5.69537	5.19467	67.6456	46.6813	65.6638	16.0329	48.6977	30.6977
tRF-1:14-Leu-AAG-1-M3	GGTAGCGTGGCCGA	tRF-5a	-	-	14	tRNA-Leu-AAG-1-1,GGTAGCGTGGCCGAGCGGTCTAAGGCGCTGGATTAAGGCTCCAGTCTCTTCGGGGGCGTGGGTTCGAATCCCACCGCTGCCACCA,Leu-AAG,0;tRNA-Leu-TAG-1-1,GGTAGCGTGGCCGAGCGGTCTAAGGCGCTGGATTTAGGCTCCAGTCTCTTCGGAGGCGTGGGTTCGAATCCCACCGCTGCCACCA,Leu-TAG,0;tRNA-Leu-TAG-3-1,GGTAGCGTGGCCGAGTGGTCTAAGGCGCTGGATTTAGGCTCCAGTCATTTCGATGGCGTGGGTTCGAATCCCACCGCTGCCACCA,Leu-TAG,0	0.500014	1.41423	0.598504	0.908415	4.56201	4.06199	22.5485	33.3438	27.3599	10.3742	6.49302	23.0233
tRF-+1:T15-Asp-GTC-1-13	AGTGATCTCTATTTT	tRF-1	-	-	15	pre_tRNA-Asp-GTC-1-13,AAACTTCCAGTACTGTCCCTGAACTACTTGCACTGCCTCATCCTCGTTAGTATAGTGGTGAGTATCCCCGCCTGTCACGCGGGAGACCGGGGTTCGATTCCCCGACGGGGAGAGTGATCTCTATTTTTAAGTATATTCCCTCCTAAAAGTTT,Asp-GTC,112	0.497549	1.41181	1	1	1.10492	0.607375	5.63714	0	0	0	3.24651	0
tRF-1:16-Ser-GCT-1-M4	GACGAGGTGGCCGAGT	tRF-5a	-	-	16	tRNA-Ser-GCT-1-1,GACGAGGTGGCCGAGTGGTTAAGGCGATGGACTGCTAATCCATTGTGCTCTGCACGCGTGGGTTCGAATCCCACCTTCGTCGCCA,Ser-GCT,0;tRNA-Ser-GCT-2-1,GACGAGGTGGCCGAGTGGTTAAGGCGATGGACTGCTAATCCATTGTGCTCTGCACGCATGGGTTCGAATCCCATCCTCGTCGCCA,Ser-GCT,0;tRNA-Ser-GCT-3-1,GACGAGGTGGCCGAGTGGTTAAGGCGATGGACTGCTAATCCATTGTGCTTTGCACGCGTGGGTTCGAATCCCATCCTCGTCGCCA,Ser-GCT,0;tRNA-Ser-GCT-4-1,GACGAGGTGGCCGAGTGGTTAAGGCGATGGACTGCTAATCCAT…	0.486968	1.4015	0.630091	0.915977	3.97275	3.48579	22.5485	33.3438	0	6.60176	9.73953	7.67442
tRF-1:23-Gly-ACC-1	GTTTCCGTAGTGTAGTGGTTAGC	tRF-5b	-	-	23	tRNA-Gly-ACC-1-1,GTTTCCGTAGTGTAGTGGTTAGCGCGTTCGCCTACCAAAGCGAAAGGTCCCCGGTTCGAAACCGGGCGGAAACACCA,Gly-ACC,0	0.480085	1.39483	0.520482	0.863327	4.99615	4.51606	45.0971	20.0063	43.7759	10.3742	25.9721	23.0233
tRF-1:30-iMet-CAT-1-M2	AGCAGAGTGGCGCAGCGGAAGCGTGCTGGG	tRF-5c	-	-	30	tRNA-iMet-CAT-1-1,AGCAGAGTGGCGCAGCGGAAGCGTGCTGGGCCCATAACCCAGAGGTCGATGGATCGAAACCATCCTCTGCTACCA,iMet-CAT,0;tRNA-iMet-CAT-3-1,AGCAGAGTGGCGCAGCGGAAGCGTGCTGGGCCCATAACCCAGAGGTCGATAGATCGAAACCATCCTCTGCTACCA,iMet-CAT,0	0.466364	1.38162	0.831106	1	3.36164	2.89527	11.2743	0	21.8879	4.71554	3.24651	7.67442
tRF-1:29-Val-CAC-4	GTTTCTGTAGTGTAGTGGTTATCACGTTC	tRF-5c	-	-	29	tRNA-Val-CAC-4-1,GTTTCTGTAGTGTAGTGGTTATCACGTTCGCCTCACACGCGAAAGGTCCCCGGTTCGAAACCGGGCAGAAACACCA,Val-CAC,0	0.463887	1.37925	0.558409	0.87898	5.4628	4.99891	62.0085	60.0188	32.8319	30.1795	12.986	7.67442
tRF-1:24-Tyr-GTA-3-M2	CCTTCGATAGCTCAGCTGGTAGAG	tRF-5b	-	-	24	tRNA-Tyr-GTA-3-1,CCTTCGATAGCTCAGCTGGTAGAGCGGAGGACTGTAGATCCTTAGGTCGCTGGTTCGATTCCGGCTCGAAGGACCA,Tyr-GTA,0;tRNA-Tyr-GTA-4-1,CCTTCGATAGCTCAGCTGGTAGAGCGGAGGACTGTAGATCCTTAGGTCGCTGGTTCGACTCCGGCTCGAAGGACCA,Tyr-GTA,0	0.458488	1.3741	0.58164	0.890898	4.93465	4.47616	28.1857	66.6876	16.416	13.2035	32.4651	0
tRF-59:75-Gly-TCC-1	TCCCGGCCAACGCACCA	tRF-3a	-	-	17	tRNA-Gly-TCC-1-1,GCGTTGGTGGTATAGTGGTGAGCATAGCTGCCTTCCAAGCAGTTGACCCGGGTTCGATTCCCGGCCAACGCACCA,Gly-TCC,58	0.458326	1.37395	0.460863	0.827487	6.89678	6.43846	62.0085	180.056	191.52	33.9519	116.874	92.093
tRF-54:75-Ala-CGC-1-M2	TCGATCCCCGGCATCTCCACCA	tRF-3b	3037b	-	22	tRNA-Ala-CGC-1-1,GGGGATGTAGCTCAGTGGTAGAGCGCATGCTTCGCATGTATGAGGCCCCGGGTTCGATCCCCGGCATCTCCACCA,Ala-CGC,53;tRNA-Ala-TGC-2-1,GGGGATGTAGCTCAGTGGTAGAGCGCATGCTTTGCATGTATGAGGCCCCGGGTTCGATCCCCGGCATCTCCACCA,Ala-TGC,53	0.457457	1.37312	0.369707	0.753007	9.9491	9.49165	834.296	1540.48	1209.31	208.427	909.023	1074.42
tRF-1:16-Leu-TAA-2	ACCAGGATGGCCGAGT	tRF-5a	-	-	16	tRNA-Leu-TAA-2-1,ACCAGGATGGCCGAGTGGTTAAGGCGTTGGACTTAAGATCCAATGGACATATGTCTGCGTGGGTTCGAACCCCACTCCTGGTACCA,Leu-TAA,0	0.455404	1.37117	1	1	2.83785	2.38245	0	26.675	0	1.88622	0	15.3488
tRF-60:76-Arg-TCT-1	TCCCGGCGGAGTCGCCA	tRF-3a	-	-	17	tRNA-Arg-TCT-1-1,GGCTCCGTGGCGCAATGGATAGCGCATTGGACTTCTAATTCAAAGGTTCCGGGTTCGAGTCCCGGCGGAGTCGCCA,Arg-TCT,59	0.445231	1.36153	0.782086	1	2.85674	2.41151	16.9114	6.66876	0	2.82933	6.49302	0
tRF-1:22-Leu-CAG-1-M2	GTCAGGATGGCCGAGCGGTCTA	tRF-5b	-	-	22	tRNA-Leu-CAG-1-1,GTCAGGATGGCCGAGCGGTCTAAGGCGCTGCGTTCAGGTCGCAGTCTCCCCTGGAGGCGTGGGTTCGAATCCCACTCCTGACACCA,Leu-CAG,0;tRNA-Leu-CAG-2-1,GTCAGGATGGCCGAGCGGTCTAAGGCGCTGCGTTCAGGTCGCAGTCTCCCCTGGAGGCGTGGGTTCGAATCCCACTTCTGACACCA,Leu-CAG,0	0.440192	1.35679	0.694142	0.936062	3.77492	3.33473	11.2743	20.0063	16.416	2.82933	12.986	15.3488
tRF-54:75-Cys-GCA-2-M4	TCAAATCCGGGTGCCCCCTCCA	tRF-3b	3004b	-	22	tRNA-Cys-GCA-2-1,GGGGGTATAGCTCAGTGGTAGAGCATTTGACTGCAGATCAAGAGGTCCCTGGTTCAAATCCGGGTGCCCCCTCCA,Cys-GCA,53;tRNA-Cys-GCA-3-1,GGGGGTATAGCTCAGTGGTAGAGCATTTGACTGCAGATCAAGAGGTCCCCGGTTCAAATCCGGGTGCCCCCTCCA,Cys-GCA,53;tRNA-Cys-GCA-5-1,GGGGGTATAGCTCAGGGGTAGAGCATTTGACTGCAGATCAAGAGGTCCCTGGTTCAAATCCGGGTGCCCCCTCCA,Cys-GCA,53;tRNA-Cys-GCA-7-1,GGGGGTATAGCTCAGGGGTAGAGCATTTGACTGCAGATCAAGAGGTCCCCGGTTCAAATCCGGGTGCCCC…	0.436275	1.35311	0.825577	1	3.59416	3.15789	11.2743	20.0063	10.944	3.77244	6.49302	15.3488
tRF-55:74-chrM.Gln-TTG	AATTCCTATTGTCCTAGCCA	tRF-3b	-	-	20	chrM.tRNA22-GlnTTG,TAGGATAAGGTGTTTAGGTAGCACGGAGAATTTTGAATTCTTAAGTGTAGGTTCAATTCCTATTGTCCTAGCCA,Gln-TTG,54	0.434726	1.35165	0.920886	1	4.11667	3.68195	28.1857	20.0063	10.944	0	0	53.7209
tRF-+1:T20-Ala-TGC-3	AACGGCTACCGCCTACCTTT	tRF-1	-	-	20	pre_tRNA-Ala-TGC-3-1,CAATCACTAGGGCATTTCTGAGCGTACTGTAACAGTGAGTGGGGATGTAGCTCAGTGGTAGAGCGCATGCTTTGCATGTATGAGGCCCCGGGTTCGATCCCCGGCATCTCCAAACGGCTACCGCCTACCTTTTAGCATAGTCTTTTTTTTTT,Ala-TGC,112	0.43027	1.34749	1	1	1.89634	1.46607	0	0	10.944	0	3.24651	7.67442
tiRNA-1:34-Lys-CTT-2	GCCCGGCTAGCTCAGTCGGTAGAGCATGGGACTC	tiRNA-5	-	-	34	tRNA-Lys-CTT-2-1,GCCCGGCTAGCTCAGTCGGTAGAGCATGGGACTCTTAATCCCAGGGTCGTGGGTTCGAGCCCCACGTTGGGCGCCA,Lys-CTT,0	0.422705	1.34044	0.502003	0.859991	6.56772	6.14502	84.5571	160.05	98.4958	20.7484	77.9163	122.791
tRF-1:24-Met-CAT-1	GCCTCGTTAGCGCAGTAGGTAGCG	tRF-5b	-	-	24	tRNA-Met-CAT-1-1,GCCTCGTTAGCGCAGTAGGTAGCGCGTCAGTCTCATAATCTGAAGGTCGTGAGTTCGATCCTCACACGGGGCACCA,Met-CAT,0	0.404457	1.32359	0.731273	0.966886	5.20286	4.79841	45.0971	33.3438	49.2479	8.48798	16.2326	69.0698
tRF-56:75-Gln-CTG-1-M7	AAATCTCGGTGGGACCTCCA	tRF-3b	-	-	20	tRNA-Gln-CTG-1-1,GGTTCCATGGTGTAATGGTTAGCACTCTGGACTCTGAATCCAGCGACCCGAGTTCAAATCTCGGTGGGACCTCCA,Gln-CTG,55;tRNA-Gln-CTG-3-1,GGTTCCATGGTGTAATGGTTAGCACTCTGGACTCTGAATCCAGCGATCCGAGTTCAAATCTCGGTGGGACCTCCA,Gln-CTG,55;tRNA-Gln-CTG-4-1,GGTTCCATGGTGTAATGGTGAGCACTCTGGACTCTGAATCCAGCGATCCGAGTTCAAATCTCGGTGGGACCTCCA,Gln-CTG,55;tRNA-Gln-TTG-1-1,GGTCCCATGGTGTAATGGTTAGCACTCTGGACTTTGAATCCAGCGATCCGAGTTCAAATCTCGGTGGGAC…	0.402938	1.3222	0.766931	0.993923	4.08852	3.68559	11.2743	33.3438	16.416	8.48798	0	23.0233
tRF-55:75-Ala-AGC-1	CGATCCCCAGCACCTCCACCA	tRF-3b	-	-	21	tRNA-Ala-AGC-1-1,GGGGGTGTAGCTCAGTGGTAGAGCGCGTGCTTAGCATGCACGAGGCCCTGGGTTCGATCCCCAGCACCTCCACCA,Ala-AGC,54	0.378621	1.3001	0.607816	0.912741	4.57184	4.19322	22.5485	46.6813	16.416	7.54487	29.2186	7.67442
tRF-1:14-Ile-AAT-1-M4	GGCCGGTTAGCTCA	tRF-5a	-	-	14	tRNA-Ile-AAT-1-1,GGCCGGTTAGCTCAGTTGGTTAGAGCGTGGTGCTAATAACGCCAAGGTCGCGGGTTCGATCCCCGTACGGGCCACCA,Ile-AAT,0;tRNA-Ile-AAT-2-1,GGCCGGTTAGCTCAGTTGGTTAGAGCATGGTGCTAATAACGCCAAGGTCACGGGTTCGATCCCCGTATGGGCCACCA,Ile-AAT,0;tRNA-Ile-AAT-3-1,GGCCGGTTAGCTCAGTTGGTTAGAGTGTGGTGCTAATAACGCCAAGGTCGCGGGTTCGATCCCCGTACGGGCCACCA,Ile-AAT,0;tRNA-Ile-AAT-4-1,GGCCGGTTAGCTCAGTTGGTTAGAGCATGGTGCTAATAACGCCAAGGTTGTGGGTTCGATGCCCGTA…	0.371565	1.29376	0.730398	0.966886	4.26084	3.88927	45.0971	6.66876	10.944	4.71554	32.4651	0
tRF-1:31-Gly-TCC-1	GCGTTGGTGGTATAGTGGTGAGCATAGCTGC	tRF-5c	-	-	31	tRNA-Gly-TCC-1-1,GCGTTGGTGGTATAGTGGTGAGCATAGCTGCCTTCCAAGCAGTTGACCCGGGTTCGATTCCCGGCCAACGCACCA,Gly-TCC,0	0.369727	1.29211	0.617589	0.915145	5.44911	5.07938	67.6456	26.675	54.7199	26.407	22.7256	15.3488
tRF-53:74-Gly-GCC-4	TCGGTTCCCGGCCAATGCACCA	tRF-3b	-	-	22	tRNA-Gly-GCC-4-1,GCATTGGTGGTTCAGTGGTAGAATTCTCGCCTGCCACGCGGGAGGCCCGGGTTCGGTTCCCGGCCAATGCACCA,Gly-GCC,52	0.368588	1.29109	0.662842	0.919427	5.53119	5.1626	28.1857	66.6876	71.1358	9.43109	64.9302	30.6977
tRF-1:32-Glu-CTC-1	TCCCTGGTGGTCTAGTGGTTAGGATTCGGCGC	tRF-5c	-	-	32	tRNA-Glu-CTC-1-1,TCCCTGGTGGTCTAGTGGTTAGGATTCGGCGCTCTCACCGCCGCGGCCCGGGTTCGATTCCCGGTCAGGGAACCA,Glu-CTC,0	0.364728	1.28764	0.509334	0.862908	7.08662	6.72189	152.203	153.381	175.104	64.1314	90.9023	99.7675
tRF-58:75-Gly-TCC-1	TTCCCGGCCAACGCACCA	tRF-3a	3041a	-	18	tRNA-Gly-TCC-1-1,GCGTTGGTGGTATAGTGGTGAGCATAGCTGCCTTCCAAGCAGTTGACCCGGGTTCGATTCCCGGCCAACGCACCA,Gly-TCC,57	0.364439	1.28738	0.547854	0.869659	5.94866	5.58422	50.7342	113.369	60.1918	27.3502	48.6977	38.3721
tRF-55:76-Tyr-GTA-2-M2	TCGATTCCGGCTCGAAGGACCA	tRF-3b	3046b	-	22	tRNA-Tyr-GTA-2-1,CCTTCGATAGCTCAGTTGGTAGAGCGGAGGACTGTAGATCCTTAGGTCGCTGGTTCGATTCCGGCTCGAAGGACCA,Tyr-GTA,54;tRNA-Tyr-GTA-3-1,CCTTCGATAGCTCAGCTGGTAGAGCGGAGGACTGTAGATCCTTAGGTCGCTGGTTCGATTCCGGCTCGAAGGACCA,Tyr-GTA,54	0.362851	1.28596	0.525913	0.863327	6.44849	6.08564	84.5571	86.6938	136.8	29.2364	97.3953	53.7209
tRF-+1:T23-Arg-ACG-1-3	TTGGGACTGGTACTCCTTTATTT	tRF-1	-	-	23	pre_tRNA-Arg-ACG-1-3,AACCTGAAGTATCGTTATTGGGCCGCACTGCAATGTCTGCGGGCCAGTGGCGCAATGGATAACGCGTCTGACTACGGATCAGAAGATTCCAGGTTCGACTCCTGGCTGGCTCGTTGGGACTGGTACTCCTTTATTTGCATCATTGGCTAATCT,Arg-ACG,113	0.355561	1.27948	0.493638	0.857555	10.3871	10.0316	952.676	2027.3	1893.31	338.576	1181.73	1611.63
tiRNA-1:34-Lys-CTT-3	GCCCGGCTAGCTCAGTCGGTAGAGCATGAGACTC	tiRNA-5	-	-	34	tRNA-Lys-CTT-3-1,GCCCGGCTAGCTCAGTCGGTAGAGCATGAGACTCTTAATCTCAGGGTCGTGGGTTCGAGCCCCACGTTGGGCGCCA,Lys-CTT,0	0.347497	1.27235	0.535711	0.863327	9.29455	8.94705	293.131	1167.03	864.574	152.784	597.358	736.744
tRF-56:77-Ile-AAT-1-M2	TCGATCCCCGTACGGGCCACCA	tRF-3b	3038b	-	22	tRNA-Ile-AAT-1-1,GGCCGGTTAGCTCAGTTGGTTAGAGCGTGGTGCTAATAACGCCAAGGTCGCGGGTTCGATCCCCGTACGGGCCACCA,Ile-AAT,55;tRNA-Ile-AAT-3-1,GGCCGGTTAGCTCAGTTGGTTAGAGTGTGGTGCTAATAACGCCAAGGTCGCGGGTTCGATCCCCGTACGGGCCACCA,Ile-AAT,55	0.34266	1.26809	1	1	3.36773	3.02507	0	26.675	10.944	0	9.73953	23.0233
tRF-+1:T22-Arg-ACG-1-3	TTGGGACTGGTACTCCTTTATT	tRF-1	1006	-	22	pre_tRNA-Arg-ACG-1-3,AACCTGAAGTATCGTTATTGGGCCGCACTGCAATGTCTGCGGGCCAGTGGCGCAATGGATAACGCGTCTGACTACGGATCAGAAGATTCCAGGTTCGACTCCTGGCTGGCTCGTTGGGACTGGTACTCCTTTATTTGCATCATTGGCTAATCT,Arg-ACG,113	0.338248	1.26422	0.515027	0.863327	11.9	11.5617	2807.29	5955.2	5154.61	1192.09	3691.28	3722.09
tRF-53:74-Gly-CCC-2-M4	TCGATTCCCGGCCAATGCACCA	tRF-3b	3042b	-	22	tRNA-Gly-CCC-2-1,GCATTGGTAGTTCAATGGTAGAATTCTCGCCTCCCACGCGGGTGACCCGGGTTCGATTCCCGGCCAATGCACCA,Gly-CCC,52;tRNA-Gly-CCC-3-1,GCATTGGTGGTTCAATGGTAGAATTCTCGCCTCCCACGCGGGTGACCCGGGTTCGATTCCCGGCCAATGCACCA,Gly-CCC,52;tRNA-Gly-CCC-4-1,GCATTGGTGGTTCAATGGTAGAATTCTCGCCTCCCACTCGGGTGACCCGGGTTCGATTCCCGGCCAATGCACCA,Gly-CCC,52;tRNA-Gly-GCC-2-1,GCATTGGTGGTTCAGTGGTAGAATTCTCGCCTGCCACGCGGGAGGCCCGGGTTCGATTCCCGGCCAATGCACC…	0.331894	1.25866	0.539762	0.866749	8.91394	8.58205	434.06	880.276	443.231	109.401	506.456	552.558
tRF-54:75-Ala-TGC-1	TCGATCCCCGGCACCTCCACCA	tRF-3b	3036b	-	22	tRNA-Ala-TGC-1-1,GGGGGTGTAGCTCAGTGGTAGAGCGCATGCTTTGCATGCATGAGGCCCCGGGTTCGATCCCCGGCACCTCCACCA,Ala-TGC,53	0.318523	1.24705	0.558485	0.87898	8.51443	8.19591	321.317	453.475	536.255	77.3349	412.307	414.419
tRF-1:30-Lys-CTT-2	GCCCGGCTAGCTCAGTCGGTAGAGCATGGG	tRF-5c	-	-	30	tRNA-Lys-CTT-2-1,GCCCGGCTAGCTCAGTCGGTAGAGCATGGGACTCTTAATCCCAGGGTCGTGGGTTCGAGCCCCACGTTGGGCGCCA,Lys-CTT,0	0.314814	1.24385	0.739256	0.973353	7.02346	6.70864	326.954	40.0125	60.1918	94.3109	71.4232	30.6977
tRF-1:28-Glu-TTC-2	TCCCATATGGTCTAGCGGTTAGGATTCC	tRF-5c	-	-	28	tRNA-Glu-TTC-2-1,TCCCATATGGTCTAGCGGTTAGGATTCCTGGTTTTCACCCAGGCGGCCCGGGTTCGACTCCCGGTATGGGAACCA,Glu-TTC,0	0.312773	1.24209	0.713452	0.952416	4.46996	4.15719	16.9114	53.35	10.944	12.2604	9.73953	15.3488
tRF-1:14-Lys-TTT-1	GCCCGGATAGCTCA	tRF-5a	-	-	14	tRNA-Lys-TTT-1-1,GCCCGGATAGCTCAGTCGGTAGAGCATCAGACTTTTAATCTGAGGGTCCAGGGTTCAAGTCCCTGTTCGGGCGCCA,Lys-TTT,0	0.312488	1.24185	0.618604	0.915145	5.89711	5.58462	45.0971	86.6938	82.0798	16.0329	74.6697	46.0465
tRF-54:75-Gln-CTG-2	TCAAATCTCGGTGGAACCTCCA	tRF-3b	3006b	-	22	tRNA-Gln-CTG-2-1,GGTTCCATGGTGTAATGGTTAGCACTCTGGACTCTGAATCCAGCGATCCGAGTTCAAATCTCGGTGGAACCTCCA,Gln-CTG,53	0.309556	1.23933	0.621023	0.915145	6.77349	6.46393	56.3714	246.744	103.968	41.4968	120.121	69.0698
tiRNA-1:33-Cys-GCA-1-M3	GGGGGTATAGCTCAGTGGTAGAGCATTTGACTG	tiRNA-5	-	-	33	tRNA-Cys-GCA-1-1,GGGGGTATAGCTCAGTGGTAGAGCATTTGACTGCAGATCAAGAGGTCCCTGGTTCAAATCCAGGTGCCCCCTCCA,Cys-GCA,0;tRNA-Cys-GCA-2-1,GGGGGTATAGCTCAGTGGTAGAGCATTTGACTGCAGATCAAGAGGTCCCTGGTTCAAATCCGGGTGCCCCCTCCA,Cys-GCA,0;tRNA-Cys-GCA-3-1,GGGGGTATAGCTCAGTGGTAGAGCATTTGACTGCAGATCAAGAGGTCCCCGGTTCAAATCCGGGTGCCCCCTCCA,Cys-GCA,0	0.306157	1.23641	0.631317	0.915977	5.68886	5.38271	56.3714	53.35	71.1358	16.976	68.1767	23.0233
tRF-69:85-Ser-CGA-2	TCCTGTTCGTGACGCCA	tRF-3a	-	-	17	tRNA-Ser-CGA-2-1,GTCACGGTGGCCGAGTGGTTAAGGCGTTGGACTCGAAATCCAATGGGGTTTCCCCGCACAGGTTCGAATCCTGTTCGTGACGCCA,Ser-CGA,68	0.300271	1.23138	0.784308	1	3.92793	3.62766	0	40.0125	16.416	10.3742	3.24651	7.67442
tRF-1:15-Ala-AGC-10-M3	GGGGGATTAGCTCAA	tRF-5a	-	-	15	tRNA-Ala-AGC-10-1,GGGGGATTAGCTCAAATGGTAGAGCGCTCGCTTAGCATGCAAGAGGTAGTGGGATCGATGCCCACATCCTCCACCA,Ala-AGC,0;tRNA-Ala-AGC-4-1,GGGGGATTAGCTCAAATGGTAGAGCGCTCGCTTAGCATGCGAGAGGTAGCGGGATCGATGCCCGCATCCTCCACCA,Ala-AGC,0;tRNA-Ala-AGC-5-1,GGGGGATTAGCTCAAATGGTAGAGCGCTCGCTTAGCATGCGAGAGGTAGTGGGATCGATGCCCACATCCTCCACCA,Ala-AGC,0	0.287272	1.22033	0.808318	1	2.83794	2.55067	0	26.675	0	4.71554	3.24651	0
tRF-60:77-Gly-ACC-1-M6	AACCGGGCGGAAACACCA	tRF-3a	-	-	18	tRNA-Gly-ACC-1-1,GTTTCCGTAGTGTAGTGGTTAGCGCGTTCGCCTACCAAAGCGAAAGGTCCCCGGTTCGAAACCGGGCGGAAACACCA,Gly-ACC,59;tRNA-Val-AAC-1-1,GTTTCCGTAGTGTAGTGGTTATCACGTTCGCCTAACACGCGAAAGGTCCCCGGTTCGAAACCGGGCGGAAACACCA,Val-AAC,58;tRNA-Val-AAC-2-1,GTTTCCGTAGTGTAGTGGTCATCACGCTCGCCTAACACGCGAGAGGTCCCCGGTTCGAAACCGGGCGGAAACACCA,Val-AAC,58;tRNA-Val-AAC-5-1,GTTTCCGTAGTGTAGTGGTTATCACATTCGCCTAACACGCGAAAGGTCCCCGGTTCGAAACCGGGC…	0.262707	1.19973	0.65348	0.919427	7.74998	7.48728	124.017	326.769	333.791	76.3918	266.214	145.814
tRF-54:75-Gly-TCC-1	TCGATTCCCGGCCAACGCACCA	tRF-3b	3041b	-	22	tRNA-Gly-TCC-1-1,GCGTTGGTGGTATAGTGGTGAGCATAGCTGCCTTCCAAGCAGTTGACCCGGGTTCGATTCCCGGCCAACGCACCA,Gly-TCC,53	0.260858	1.19819	0.633867	0.915977	8.00504	7.74418	169.114	393.457	372.095	77.3349	288.939	253.256
tRF-68:85-Ser-CGA-2	ATCCTGTTCGTGACGCCA	tRF-3a	3027a	-	18	tRNA-Ser-CGA-2-1,GTCACGGTGGCCGAGTGGTTAAGGCGTTGGACTCGAAATCCAATGGGGTTTCCCCGCACAGGTTCGAATCCTGTTCGTGACGCCA,Ser-CGA,67	0.258571	1.19629	0.752127	0.985055	5.42897	5.1704	22.5485	73.3563	60.1918	16.976	38.9581	38.3721
tRF-1:22-Gly-GCC-1	GCATGGGTGGTTCAGTGGTAGA	tRF-5b	5002a	-	22	tRNA-Gly-GCC-1-1,GCATGGGTGGTTCAGTGGTAGAATTCTCGCCTGCCACGCGGGAGGCCCGGGTTCGATTCCCGGCCCATGCACCA,Gly-GCC,0	0.255232	1.19353	0.749187	0.98353	5.32069	5.06545	16.9114	86.6938	43.7759	12.2604	38.9581	46.0465
tRF-1:22-Cys-GCA-1-M3	GGGGGTATAGCTCAGTGGTAGA	tRF-5b	-	-	22	tRNA-Cys-GCA-1-1,GGGGGTATAGCTCAGTGGTAGAGCATTTGACTGCAGATCAAGAGGTCCCTGGTTCAAATCCAGGTGCCCCCTCCA,Cys-GCA,0;tRNA-Cys-GCA-2-1,GGGGGTATAGCTCAGTGGTAGAGCATTTGACTGCAGATCAAGAGGTCCCTGGTTCAAATCCGGGTGCCCCCTCCA,Cys-GCA,0;tRNA-Cys-GCA-3-1,GGGGGTATAGCTCAGTGGTAGAGCATTTGACTGCAGATCAAGAGGTCCCCGGTTCAAATCCGGGTGCCCCCTCCA,Cys-GCA,0	0.251216	1.19021	0.774815	1	5.10781	4.85659	11.2743	53.35	60.1918	12.2604	58.4372	0
tRF-1:15-Thr-TGT-2	GGCCCTATAGCTCAG	tRF-5a	-	-	15	tRNA-Thr-TGT-2-1,GGCCCTATAGCTCAGGGGTTAGAGCACTGGTCTTGTAAACCAGGGGTCGCGAGTTCAAATCTCGCTGGGGCCTCCA,Thr-TGT,0	0.24599	1.18591	0.788102	1	4.92018	4.67419	11.2743	80.0251	21.8879	8.48798	45.4512	15.3488
tRF-68:85-Ser-TGA-1	ACCCTGCTCGCTGCGCCA	tRF-3a	3011a	-	18	tRNA-Ser-TGA-1-1,GCAGCGATGGCCGAGTGGTTAAGGCGTTGGACTTGAAATCCAATGGGGTCTCCCCGCGCAGGTTCGAACCCTGCTCGCTGCGCCA,Ser-TGA,67	0.243783	1.18409	0.795606	1	5.58269	5.33891	22.5485	86.6938	65.6638	12.2604	77.9163	23.0233
tRF-60:76-Arg-ACG-1-M2	TCCTGGCTGGCTCGCCA	tRF-3a	-	-	17	tRNA-Arg-ACG-1-1,GGGCCAGTGGCGCAATGGATAACGCGTCTGACTACGGATCAGAAGATTCCAGGTTCGACTCCTGGCTGGCTCGCCA,Arg-ACG,59;tRNA-Arg-ACG-3-1,GGGCCAGTGGCGCAATGGATAACGCGTCTGACTACGGATCAGAAGATTCTAGGTTCGACTCCTGGCTGGCTCGCCA,Arg-ACG,59	0.241965	1.1826	0.699357	0.940397	6.7271	6.48514	62.0085	133.375	186.048	47.1554	84.4093	99.7675
tRF-1:16-Ala-AGC-6-M2	GGGGAATTAGCTCAAA	tRF-5a	-	-	16	tRNA-Ala-AGC-6-1,GGGGAATTAGCTCAAATGGTAGAGCGCTCGCTTAGCATGCGAGAGGTAGCGGGATCGATGCCCGCATTCTCCACCA,Ala-AGC,0;tRNA-Ala-AGC-7-1,GGGGAATTAGCTCAAATGGTAGAGCGCTCGCTTAGCATGTGAGAGGTAGCGGGATCGATGCCCGCATTCTCCACCA,Ala-AGC,0	0.239657	1.18071	0.844167	1	4.88409	4.64443	11.2743	26.675	65.6638	10.3742	22.7256	38.3721
tRF-1:24-Phe-GAA-1-M2	GCCGAAATAGCTCAGTTGGGAGAG	tRF-5b	-	-	24	tRNA-Phe-GAA-1-1,GCCGAAATAGCTCAGTTGGGAGAGCGTTAGACTGAAGATCTAAAGGTCCCTGGTTCGATCCCGGGTTTCGGCACCA,Phe-GAA,0;tRNA-Phe-GAA-3-1,GCCGAAATAGCTCAGTTGGGAGAGCGTTAGACTGAAGATCTAAAGGTCCCTGGTTCAATCCCGGGTTTCGGCACCA,Phe-GAA,0	0.231945	1.17442	1	1	3.41464	3.1827	28.1857	0	5.47199	6.60176	3.24651	7.67442
tRF-1:31-Gly-GCC-1	GCATGGGTGGTTCAGTGGTAGAATTCTCGCC	tRF-5c	5002b	-	31	tRNA-Gly-GCC-1-1,GCATGGGTGGTTCAGTGGTAGAATTCTCGCCTGCCACGCGGGAGGCCCGGGTTCGATTCCCGGCCCATGCACCA,Gly-GCC,0	0.229309	1.17227	0.670485	0.919427	11.6807	11.4514	3038.42	3827.87	4881.01	1735.32	2941.34	2156.51
tRF-54:75-Ala-CGC-2-M2	TCAATCCCCGGCATCTCCACCA	tRF-3b	-	-	22	tRNA-Ala-CGC-2-1,GGGGATGTAGCTCAGTGGTAGAGCGCGCGCTTCGCATGTGTGAGGTCCCGGGTTCAATCCCCGGCATCTCCACCA,Ala-CGC,53;tRNA-Ala-TGC-4-1,GGGGATGTAGCTCAGTGGTAGAGCGCATGCTTTGCATGTATGAGGCCCCGGGTTCAATCCCCGGCATCTCCACCA,Ala-TGC,53	0.226269	1.16981	0.684242	0.929868	8.3757	8.14943	214.211	600.188	404.927	88.6522	318.158	452.791
tRF-1:16-Leu-TAG-3	GGTAGCGTGGCCGAGT	tRF-5a	-	-	16	tRNA-Leu-TAG-3-1,GGTAGCGTGGCCGAGTGGTCTAAGGCGCTGGATTTAGGCTCCAGTCATTTCGATGGCGTGGGTTCGAATCCCACCGCTGCCACCA,Leu-TAG,0	0.222554	1.1668	0.835367	1	5.8746	5.65205	33.8228	146.713	38.3039	12.2604	51.9442	99.7675
tRF-1:14-Tyr-GTA-1-M4	CCTTCGATAGCTCA	tRF-5a	-	-	14	tRNA-Tyr-GTA-1-1,CCTTCGATAGCTCAGTTGGTAGAGCGGAGGACTGTAGATCCTTAGGTCGCTGGTTCGAATCCGGCTCGAAGGACCA,Tyr-GTA,0;tRNA-Tyr-GTA-2-1,CCTTCGATAGCTCAGTTGGTAGAGCGGAGGACTGTAGATCCTTAGGTCGCTGGTTCGATTCCGGCTCGAAGGACCA,Tyr-GTA,0;tRNA-Tyr-GTA-3-1,CCTTCGATAGCTCAGCTGGTAGAGCGGAGGACTGTAGATCCTTAGGTCGCTGGTTCGATTCCGGCTCGAAGGACCA,Tyr-GTA,0;tRNA-Tyr-GTA-4-1,CCTTCGATAGCTCAGCTGGTAGAGCGGAGGACTGTAGATCCTTAGGTCGCTGGTTCGACTCCGGCTCGAA…	0.205493	1.15308	1	1	3.12766	2.92217	0	26.675	5.47199	3.77244	6.49302	7.67442
tRF-55:76-Val-TAC-1	TCGAGCCCCAGTGGAACCACCA	tRF-3b	3032b	-	22	tRNA-Val-TAC-1-1,GGTTCCATAGTGTAGCGGTTATCACGTCTGCTTTACACGCAGAAGGTCCTGGGTTCGAGCCCCAGTGGAACCACCA,Val-TAC,54	0.181086	1.13374	0.767483	0.993923	6.86586	6.68477	90.1942	153.381	175.104	34.895	142.846	122.791
tRF-57:75-Gln-CTG-1-M7	AATCTCGGTGGGACCTCCA	tRF-3b	-	-	19	tRNA-Gln-CTG-1-1,GGTTCCATGGTGTAATGGTTAGCACTCTGGACTCTGAATCCAGCGACCCGAGTTCAAATCTCGGTGGGACCTCCA,Gln-CTG,56;tRNA-Gln-CTG-3-1,GGTTCCATGGTGTAATGGTTAGCACTCTGGACTCTGAATCCAGCGATCCGAGTTCAAATCTCGGTGGGACCTCCA,Gln-CTG,56;tRNA-Gln-CTG-4-1,GGTTCCATGGTGTAATGGTGAGCACTCTGGACTCTGAATCCAGCGATCCGAGTTCAAATCTCGGTGGGACCTCCA,Gln-CTG,56;tRNA-Gln-TTG-1-1,GGTCCCATGGTGTAATGGTTAGCACTCTGGACTTTGAATCCAGCGATCCGAGTTCAAATCTCGGTGGGAC…	0.157661	1.11548	0.913885	1	4.83502	4.67736	22.5485	46.6813	32.8319	9.43109	42.2046	15.3488
tRF-58:76-Tyr-GTA-2-M2	ATTCCGGCTCGAAGGACCA	tRF-3b	-	-	19	tRNA-Tyr-GTA-2-1,CCTTCGATAGCTCAGTTGGTAGAGCGGAGGACTGTAGATCCTTAGGTCGCTGGTTCGATTCCGGCTCGAAGGACCA,Tyr-GTA,57;tRNA-Tyr-GTA-3-1,CCTTCGATAGCTCAGCTGGTAGAGCGGAGGACTGTAGATCCTTAGGTCGCTGGTTCGATTCCGGCTCGAAGGACCA,Tyr-GTA,57	0.15448	1.11302	0.875253	1	5.34577	5.19129	45.0971	80.0251	21.8879	16.0329	48.6977	30.6977
tRF-59:75-Trp-CCA-1-M6	TCACGTCGGGGTCACCA	tRF-3a	-	-	17	tRNA-Trp-CCA-1-1,GACCTCGTGGCGCAATGGTAGCGCGTCTGACTCCAGATCAGAAGGTTGCGTGTTCAAATCACGTCGGGGTCACCA,Trp-CCA,58;tRNA-Trp-CCA-2-1,GACCTCGTGGCGCAACGGTAGCGCGTCTGACTCCAGATCAGAAGGCTGCGTGTTCGAATCACGTCGGGGTCACCA,Trp-CCA,58;tRNA-Trp-CCA-3-1,GGCCTCGTGGCGCAACGGTAGCGCGTCTGACTCCAGATCAGAAGGTTGCGTGTTCAAATCACGTCGGGGTCACCA,Trp-CCA,58;tRNA-Trp-CCA-4-1,GACCTCGTGGCGCAACGGTAGCGCGTCTGACTCCAGATCAGAAGGTTGCGTGTTCAAATCACGTCGGGGT…	0.153527	1.11229	0.822596	1	5.4203	5.26677	28.1857	46.6813	76.6078	17.9191	55.1907	23.0233
tRF-56:77-Thr-AGT-1-M2	TCGAATCCCAGCGGTGCCTCCA	tRF-3b	3020b	-	22	tRNA-Thr-AGT-1-1,GGCGCCGTGGCTTAGTTGGTTAAAGCGCCTGTCTAGTAAACAGGAGATCCTGGGTTCGAATCCCAGCGGTGCCTCCA,Thr-AGT,55;tRNA-Thr-AGT-3-1,GGCGCCGTGGCTTAGCTGGTTAAAGCGCCTGTCTAGTAAACAGGAGATCCTGGGTTCGAATCCCAGCGGTGCCTCCA,Thr-AGT,55	0.151502	1.11073	0.807914	1	7.28219	7.13069	112.743	213.4	235.295	41.4968	172.065	214.884
tRF-1:14-Gly-CCC-1	GCGCCGCTGGTGTA	tRF-5a	-	-	14	tRNA-Gly-CCC-1-1,GCGCCGCTGGTGTAGTGGTATCATGCAAGATTCCCATTCTTGCGACCCGGGTTCGATTCCCGGGCGGCGCACCA,Gly-CCC,0	0.138261	1.10058	0.920496	1	4.83648	4.69822	16.9114	60.0188	27.3599	14.1466	35.7116	7.67442
tRF-1:15-Glu-CTC-1-M4	TCCCTGGTGGTCTAG	tRF-5a	-	-	15	tRNA-Glu-CTC-1-1,TCCCTGGTGGTCTAGTGGTTAGGATTCGGCGCTCTCACCGCCGCGGCCCGGGTTCGATTCCCGGTCAGGGAACCA,Glu-CTC,0;tRNA-Glu-CTC-2-1,TCCCTGGTGGTCTAGTGGTTAGGATTTGGCGCTCTCACCGCCGCGGCCTGGGTTCGATTCCCGGTCAGGGAACCA,Glu-CTC,0;tRNA-Glu-CTC-5-1,TCCCTGGTGGTCTAGTGGTTAGGCTTTGGTGCTCTCACCTCCATGGCCCAGGTTTGATTCCTGGTCAGGGAACCA,Glu-CTC,0;tRNA-Glu-TTC-3-1,TCCCTGGTGGTCTAGTGGCTAGGATTCGGCGCTTTCACCGCCGCGGCCCGGGTTCGATTCCCGGTCAGGGAAC…	0.134109	1.09741	0.915113	1	4.91569	4.78158	28.1857	40.0125	38.3039	10.3742	35.7116	30.6977
tRF-54:75-Ala-AGC-1	TCGATCCCCAGCACCTCCACCA	tRF-3b	-	-	22	tRNA-Ala-AGC-1-1,GGGGGTGTAGCTCAGTGGTAGAGCGCGTGCTTAGCATGCACGAGGCCCTGGGTTCGATCCCCAGCACCTCCACCA,Ala-AGC,53	0.116675	1.08423	0.825136	1	9.25501	9.13834	456.608	1046.99	727.774	196.167	636.316	828.837
tiRNA-1:33-Gly-CCC-3-M2	GCATTGGTGGTTCAATGGTAGAATTCTCGCCTC	tiRNA-5	-	-	33	tRNA-Gly-CCC-3-1,GCATTGGTGGTTCAATGGTAGAATTCTCGCCTCCCACGCGGGTGACCCGGGTTCGATTCCCGGCCAATGCACCA,Gly-CCC,0;tRNA-Gly-CCC-4-1,GCATTGGTGGTTCAATGGTAGAATTCTCGCCTCCCACTCGGGTGACCCGGGTTCGATTCCCGGCCAATGCACCA,Gly-CCC,0	0.108751	1.07829	0.846211	1	6.52453	6.41578	73.2828	113.369	142.272	33.9519	136.353	61.3954
tRF-1:31-Asp-GTC-1-M2	TCCTCGTTAGTATAGTGGTGAGTATCCCCGC	tRF-5c	-	-	31	tRNA-Asp-GTC-1-1,TCCTCGTTAGTATAGTGGTGAGTATCCCCGCCTGTCACGCGGGAGACCGGGGTTCGATTCCCCGACGGGGAGCCA,Asp-GTC,0;tRNA-Asp-GTC-4-1,TCCTCGTTAGTATAGTGGTGAGTATCCCCGCCTGTCACACAGGAGACCGGGGTTCGATTCCCCGATGGGGAGCCA,Asp-GTC,0	0.104426	1.07507	0.877312	1	5.90882	5.80439	67.6456	73.3563	71.1358	44.3261	29.2186	38.3721
tRF-1:14-Ala-AGC-3-M13	GGGGATGTAGCTCA	tRF-5a	-	-	14	tRNA-Ala-AGC-3-1,GGGGATGTAGCTCAGTGGTAGAGCGCATGCTTAGCATGCATGAGGTCCTGGGTTCGATCCCCAGCATCTCCACCA,Ala-AGC,0;tRNA-Ala-AGC-8-1,GGGGATGTAGCTCAGTGGTAGAGCGCATGCTTAGCATGCATGAGGTCCTGGGTTCGATCTCCAGGTTTTTTTCCA,Ala-AGC,0;tRNA-Ala-CGC-1-1,GGGGATGTAGCTCAGTGGTAGAGCGCATGCTTCGCATGTATGAGGCCCCGGGTTCGATCCCCGGCATCTCCACCA,Ala-CGC,0;tRNA-Ala-CGC-2-1,GGGGATGTAGCTCAGTGGTAGAGCGCGCGCTTCGCATGTGTGAGGTCCCGGGTTCAATCCCCGGCATCTCCAC…	0.0955538	1.06848	0.905358	1	6.56908	6.47353	118.38	100.031	114.912	33.9519	94.1488	130.465
tRF-59:76-Tyr-GTA-1	ATCCGGCTCGAAGGACCA	tRF-3a	-	-	18	tRNA-Tyr-GTA-1-1,CCTTCGATAGCTCAGTTGGTAGAGCGGAGGACTGTAGATCCTTAGGTCGCTGGTTCGAATCCGGCTCGAAGGACCA,Tyr-GTA,58	0.0951119	1.06815	0.856503	1	9.44863	9.35351	558.077	1220.38	771.55	247.095	928.502	690.698
tRF-60:76-Phe-GAA-2	CCCGGGTTTCAGCACCA	tRF-3a	-	-	17	tRNA-Phe-GAA-2-1,GCTGAAATAGCTCAGTTGGGAGAGCGTTAGACTGAAGATCTAAAGGTCCCTGGTTCGATCCCGGGTTTCAGCACCA,Phe-GAA,59	0.0900386	1.0644	1	1	4.98223	4.89219	16.9114	53.35	43.7759	9.43109	12.986	76.7442
tRF-53:74-Gly-GCC-1	TCGATTCCCGGCCCATGCACCA	tRF-3b	3043b	-	22	tRNA-Gly-GCC-1-1,GCATGGGTGGTTCAGTGGTAGAATTCTCGCCTGCCACGCGGGAGGCCCGGGTTCGATTCCCGGCCCATGCACCA,Gly-GCC,52	0.0673906	1.04782	0.907461	1	8.27822	8.21083	321.317	453.475	339.263	99.9695	415.553	353.023
tRF-1:31-Thr-TGT-3	GGCTCCATAGCTCAGGGGTTAGAGCACTGGT	tRF-5c	-	-	31	tRNA-Thr-TGT-3-1,GGCTCCATAGCTCAGGGGTTAGAGCACTGGTCTTGTAAACCAGGGGTCGCGAGTTCAAATCTCGCTGGGGCCTCCA,Thr-TGT,0	0.0663579	1.04707	1	1	4.49375	4.42739	56.3714	0	16.416	11.3173	19.4791	23.0233
tRF-1:32-His-GTG-2	GCCGTGATCGTATAGTGGTTAGTACTCTGCGT	tRF-5c	-	-	32	tRNA-His-GTG-2-1,GCCGTGATCGTATAGTGGTTAGTACTCTGCGTTGTGGCCGCAGCAACCTCGGTTCGAATCCGAGTCACGGCACCA,His-GTG,0	0.0639199	1.0453	1	1	4.84376	4.77984	33.8228	40.0125	27.3599	10.3742	25.9721	46.0465
tRF-1:28-His-GTG-2	GCCGTGATCGTATAGTGGTTAGTACTCT	tRF-5c	-	-	28	tRNA-His-GTG-2-1,GCCGTGATCGTATAGTGGTTAGTACTCTGCGTTGTGGCCGCAGCAACCTCGGTTCGAATCCGAGTCACGGCACCA,His-GTG,0	0.0346813	1.02433	0.958685	1	6.94675	6.91207	214.211	100.031	109.44	82.0505	68.1767	130.465
tRF-1:31-Glu-TTC-1	TCCCACATGGTCTAGCGGTTAGGATTCCTGG	tRF-5c	-	-	31	tRNA-Glu-TTC-1-1,TCCCACATGGTCTAGCGGTTAGGATTCCTGGTTTTCACCCAGGCGGCCCGGGTTCGACTCCCGGTGTGGGAACCA,Glu-TTC,0	0.0289158	1.02025	0.962847	1	9.34895	9.32003	715.916	466.813	1105.34	464.01	597.358	368.372
tRF-64:85-Leu-AAG-1-M4	TCGAATCCCACCGCTGCCACCA	tRF-3b	3015b	-	22	tRNA-Leu-AAG-1-1,GGTAGCGTGGCCGAGCGGTCTAAGGCGCTGGATTAAGGCTCCAGTCTCTTCGGGGGCGTGGGTTCGAATCCCACCGCTGCCACCA,Leu-AAG,63;tRNA-Leu-AAG-2-1,GGTAGTGTGGCCGAGCGGTCTAAGGCGCTGGATTAAGGCTCCAGTCTCTTCGGGGGCGTGGGTTCGAATCCCACCGCTGCCACCA,Leu-AAG,63;tRNA-Leu-TAG-1-1,GGTAGCGTGGCCGAGCGGTCTAAGGCGCTGGATTTAGGCTCCAGTCTCTTCGGAGGCGTGGGTTCGAATCCCACCGCTGCCACCA,Leu-TAG,63;tRNA-Leu-TAG-3-1,GGTAGCGTGGCCGAGTGGTCTAAGGCGCTGGATTTAGGCT…	0.0196298	1.0137	1	1	6.33686	6.31724	78.9199	166.719	49.2479	16.976	146.093	84.4186
tRF-1:31-Glu-CTC-2	TCCCTGGTGGTCTAGTGGTTAGGATTTGGCG	tRF-5c	-	-	31	tRNA-Glu-CTC-2-1,TCCCTGGTGGTCTAGTGGTTAGGATTTGGCGCTCTCACCGCCGCGGCCTGGGTTCGATTCCCGGTCAGGGAACCA,Glu-CTC,0	0.0182633	1.01274	1	1	5.5062	5.48793	78.9199	13.3375	60.1918	45.2692	25.9721	0
tRF-1:16-Leu-AAG-1-M2	GGTAGCGTGGCCGAGC	tRF-5a	5013a	-	16	tRNA-Leu-AAG-1-1,GGTAGCGTGGCCGAGCGGTCTAAGGCGCTGGATTAAGGCTCCAGTCTCTTCGGGGGCGTGGGTTCGAATCCCACCGCTGCCACCA,Leu-AAG,0;tRNA-Leu-TAG-1-1,GGTAGCGTGGCCGAGCGGTCTAAGGCGCTGGATTTAGGCTCCAGTCTCTTCGGAGGCGTGGGTTCGAATCCCACCGCTGCCACCA,Leu-TAG,0	0.016094	1.01122	1	1	6.55681	6.54072	78.9199	133.375	125.856	20.7484	61.6837	230.233
tRF-1:16-Gly-GCC-2-M3	GCATTGGTGGTTCAGT	tRF-5a	-	-	16	tRNA-Gly-GCC-2-1,GCATTGGTGGTTCAGTGGTAGAATTCTCGCCTGCCACGCGGGAGGCCCGGGTTCGATTCCCGGCCAATGCACCA,Gly-GCC,0;tRNA-Gly-GCC-3-1,GCATTGGTGGTTCAGTGGTAGAATTCTCGCCTGCCACGCGGGAGGCCCGGGTTTGATTCCCGGCCAATGCACCA,Gly-GCC,0;tRNA-Gly-GCC-4-1,GCATTGGTGGTTCAGTGGTAGAATTCTCGCCTGCCACGCGGGAGGCCCGGGTTCGGTTCCCGGCCAATGCACCA,Gly-GCC,0	0.0159893	1.01114	1	1	7.62214	7.60616	163.477	333.438	218.879	64.1314	214.27	306.977
tRF-1:29-Asp-GTC-2	TCCTCGTTAGTATAGTGGTTAGTATCCCC	tRF-5c	-	-	29	tRNA-Asp-GTC-2-1,TCCTCGTTAGTATAGTGGTTAGTATCCCCGCCTGTCACGCGGGAGACCGGGGTTCAATTCCCCGACGGGGAGCCA,Asp-GTC,0	0.00871029	1.00606	1	1	2.4575	2.44879	5.63714	13.3375	0	1.88622	9.73953	0
tRF-1:16-Leu-CAA-1-M5	GTCAGGATGGCCGAGT	tRF-5a	-	-	16	tRNA-Leu-CAA-1-1,GTCAGGATGGCCGAGTGGTCTAAGGCGCCAGACTCAAGTTCTGGTCTCCCCTGGAGGCGTGGGTTCGAATCCCACTTCTGACACCA,Leu-CAA,0;tRNA-Leu-CAA-2-1,GTCAGGATGGCCGAGTGGTCTAAGGCGCCAGACTCAAGTTCTGGTCTCCGTATGGAGGCGTGGGTTCGAATCCCACTTCTGACACCA,Leu-CAA,0;tRNA-Leu-CAA-3-1,GTCAGGATGGCCGAGTGGTCTAAGGCGCCAGACTCAAGTTCTGGTCTCCGAATGGAGGCGTGGGTTCGAATCCCACTTCTGACACCA,Leu-CAA,0;tRNA-Leu-CAA-4-1,GTCAGGATGGCCGAGTGGTCTAAGGCGCCAGACTCAAG…	0.00741229	1.00515	1	1	4.07178	4.06437	16.9114	6.66876	32.8319	1.88622	25.9721	30.6977
tRF-1:24-Gly-GCC-2-M3	GCATTGGTGGTTCAGTGGTAGAAT	tRF-5b	-	-	24	tRNA-Gly-GCC-2-1,GCATTGGTGGTTCAGTGGTAGAATTCTCGCCTGCCACGCGGGAGGCCCGGGTTCGATTCCCGGCCAATGCACCA,Gly-GCC,0;tRNA-Gly-GCC-3-1,GCATTGGTGGTTCAGTGGTAGAATTCTCGCCTGCCACGCGGGAGGCCCGGGTTTGATTCCCGGCCAATGCACCA,Gly-GCC,0;tRNA-Gly-GCC-4-1,GCATTGGTGGTTCAGTGGTAGAATTCTCGCCTGCCACGCGGGAGGCCCGGGTTCGGTTCCCGGCCAATGCACCA,Gly-GCC,0	0.00296744	1.00206	1	1	6.14948	6.14651	56.3714	93.3626	103.968	35.8381	71.4232	76.7442
tRF-1:15-Ala-AGC-6-M2	GGGGAATTAGCTCAA	tRF-5a	-	-	15	tRNA-Ala-AGC-6-1,GGGGAATTAGCTCAAATGGTAGAGCGCTCGCTTAGCATGCGAGAGGTAGCGGGATCGATGCCCGCATTCTCCACCA,Ala-AGC,0;tRNA-Ala-AGC-7-1,GGGGAATTAGCTCAAATGGTAGAGCGCTCGCTTAGCATGTGAGAGGTAGCGGGATCGATGCCCGCATTCTCCACCA,Ala-AGC,0	-0.00734746	0.99492	1	1	4.25919	4.26654	33.8228	33.3438	0	7.54487	22.7256	23.0233
tRF-1:32-Gly-CCC-1	GCGCCGCTGGTGTAGTGGTATCATGCAAGATT	tRF-5c	-	-	32	tRNA-Gly-CCC-1-1,GCGCCGCTGGTGTAGTGGTATCATGCAAGATTCCCATTCTTGCGACCCGGGTTCGATTCCCGGGCGGCGCACCA,Gly-CCC,0	-0.0117723	0.991873	1	1	4.4454	4.45717	11.2743	33.3438	32.8319	6.60176	19.4791	46.0465
tRF-1:23-Leu-AAG-1-M2	GGTAGCGTGGCCGAGCGGTCTAA	tRF-5b	-	-	23	tRNA-Leu-AAG-1-1,GGTAGCGTGGCCGAGCGGTCTAAGGCGCTGGATTAAGGCTCCAGTCTCTTCGGGGGCGTGGGTTCGAATCCCACCGCTGCCACCA,Leu-AAG,0;tRNA-Leu-TAG-1-1,GGTAGCGTGGCCGAGCGGTCTAAGGCGCTGGATTTAGGCTCCAGTCTCTTCGGAGGCGTGGGTTCGAATCCCACCGCTGCCACCA,Leu-TAG,0	-0.0135692	0.990639	1	1	2.82255	2.83612	0	20.0063	5.47199	0	16.2326	7.67442
tRF-68:85-Ser-GCT-2-M3	ATCCCATCCTCGTCGCCA	tRF-3a	3021a	-	18	tRNA-Ser-GCT-2-1,GACGAGGTGGCCGAGTGGTTAAGGCGATGGACTGCTAATCCATTGTGCTCTGCACGCATGGGTTCGAATCCCATCCTCGTCGCCA,Ser-GCT,67;tRNA-Ser-GCT-3-1,GACGAGGTGGCCGAGTGGTTAAGGCGATGGACTGCTAATCCATTGTGCTTTGCACGCGTGGGTTCGAATCCCATCCTCGTCGCCA,Ser-GCT,67;tRNA-Ser-GCT-4-1,GACGAGGTGGCCGAGTGGTTAAGGCGATGGACTGCTAATCCATTGTGCTCTGCACGCGTGGGTTCGAATCCCATCCTCGTCGCCA,Ser-GCT,67	-0.014241	0.990177	1	1	5.56473	5.57897	56.3714	80.0251	32.8319	15.0897	94.1488	23.0233
tRF-1:32-Gly-CCC-3-M2	GCATTGGTGGTTCAATGGTAGAATTCTCGCCT	tRF-5c	-	-	32	tRNA-Gly-CCC-3-1,GCATTGGTGGTTCAATGGTAGAATTCTCGCCTCCCACGCGGGTGACCCGGGTTCGATTCCCGGCCAATGCACCA,Gly-CCC,0;tRNA-Gly-CCC-4-1,GCATTGGTGGTTCAATGGTAGAATTCTCGCCTCCCACTCGGGTGACCCGGGTTCGATTCCCGGCCAATGCACCA,Gly-CCC,0	-0.0218582	0.984963	1	1	3.39021	3.41207	11.2743	20.0063	5.47199	7.54487	9.73953	0
tRF-54:75-Ala-AGC-3	TCGATCCCCAGCATCTCCACCA	tRF-3b	-	-	22	tRNA-Ala-AGC-3-1,GGGGATGTAGCTCAGTGGTAGAGCGCATGCTTAGCATGCATGAGGTCCTGGGTTCGATCCCCAGCATCTCCACCA,Ala-AGC,53	-0.02386	0.983598	0.958946	1	7.7572	7.78106	146.566	333.438	306.431	82.9936	233.749	322.326
tRF-52:72-Ala-CGC-1-M2	GTTCGATCCCCGGCATCTCCA	tRF-3b	-	-	21	tRNA-Ala-CGC-1-1,GGGGATGTAGCTCAGTGGTAGAGCGCATGCTTCGCATGTATGAGGCCCCGGGTTCGATCCCCGGCATCTCCACCA,Ala-CGC,51;tRNA-Ala-TGC-2-1,GGGGATGTAGCTCAGTGGTAGAGCGCATGCTTTGCATGTATGAGGCCCCGGGTTCGATCCCCGGCATCTCCACCA,Ala-TGC,51	-0.0246451	0.983062	1	1	4.80347	4.82812	5.63714	40.0125	54.7199	19.8053	29.2186	7.67442
tRF-60:76-Lys-CTT-1-M4	CCCCACGTTGGGCGCCA	tRF-3a	-	-	17	tRNA-Lys-CTT-1-1,GCCCAGCTAGCTCAGTTGGTAGAGCGTGGGACTCTTAATCCTAGGGTCGTGGGTTCGAACCCCACGTTGGGCGCCA,Lys-CTT,59;tRNA-Lys-CTT-14-1,CCCCGGCTAGCTCAGTCAGTAGAGCTTGAGAATCTTAATCTCAGGGTCGTGGGTTGGAGCCCCACGTTGGGCGCCA,Lys-CTT,59;tRNA-Lys-CTT-2-1,GCCCGGCTAGCTCAGTCGGTAGAGCATGGGACTCTTAATCCCAGGGTCGTGGGTTCGAGCCCCACGTTGGGCGCCA,Lys-CTT,59;tRNA-Lys-CTT-3-1,GCCCGGCTAGCTCAGTCGGTAGAGCATGAGACTCTTAATCTCAGGGTCGTGGGTTCGAGCCCCACG…	-0.0337054	0.976908	1	1	4.84377	4.87747	33.8228	40.0125	27.3599	14.1466	35.7116	23.0233
tRF-69:86-Leu-TAA-2	ACCCCACTCCTGGTACCA	tRF-3a	3010a	-	18	tRNA-Leu-TAA-2-1,ACCAGGATGGCCGAGTGGTTAAGGCGTTGGACTTAAGATCCAATGGACATATGTCTGCGTGGGTTCGAACCCCACTCCTGGTACCA,Leu-TAA,68	-0.0370032	0.974677	1	1	5.11777	5.15478	28.1857	26.675	65.6638	18.8622	32.4651	38.3721
tRF-1:28-Gln-CTG-1-M3	GGTTCCATGGTGTAATGGTTAGCACTCT	tRF-5c	-	-	28	tRNA-Gln-CTG-1-1,GGTTCCATGGTGTAATGGTTAGCACTCTGGACTCTGAATCCAGCGACCCGAGTTCAAATCTCGGTGGGACCTCCA,Gln-CTG,0;tRNA-Gln-CTG-2-1,GGTTCCATGGTGTAATGGTTAGCACTCTGGACTCTGAATCCAGCGATCCGAGTTCAAATCTCGGTGGAACCTCCA,Gln-CTG,0;tRNA-Gln-CTG-3-1,GGTTCCATGGTGTAATGGTTAGCACTCTGGACTCTGAATCCAGCGATCCGAGTTCAAATCTCGGTGGGACCTCCA,Gln-CTG,0	-0.0446597	0.969518	1	1	3.98212	4.02678	33.8228	13.3375	5.47199	16.0329	6.49302	0
tRF-1:30-Glu-TTC-3	TCCCTGGTGGTCTAGTGGCTAGGATTCGGC	tRF-5c	-	-	30	tRNA-Glu-TTC-3-1,TCCCTGGTGGTCTAGTGGCTAGGATTCGGCGCTTTCACCGCCGCGGCCCGGGTTCGATTCCCGGTCAGGGAACCA,Glu-TTC,0	-0.0723747	0.951071	0.938037	1	6.42316	6.49554	78.9199	100.031	125.856	57.5296	58.4372	99.7675
tRF-1:14-Ala-AGC-10-M3	GGGGGATTAGCTCA	tRF-5a	-	-	14	tRNA-Ala-AGC-10-1,GGGGGATTAGCTCAAATGGTAGAGCGCTCGCTTAGCATGCAAGAGGTAGTGGGATCGATGCCCACATCCTCCACCA,Ala-AGC,0;tRNA-Ala-AGC-4-1,GGGGGATTAGCTCAAATGGTAGAGCGCTCGCTTAGCATGCGAGAGGTAGCGGGATCGATGCCCGCATCCTCCACCA,Ala-AGC,0;tRNA-Ala-AGC-5-1,GGGGGATTAGCTCAAATGGTAGAGCGCTCGCTTAGCATGCGAGAGGTAGTGGGATCGATGCCCACATCCTCCACCA,Ala-AGC,0	-0.0745456	0.949641	0.943725	1	6.45119	6.52574	33.8228	113.369	169.632	36.7812	139.6	76.7442
tRF-1:14-Cys-GCA-1-M16	GGGGGTATAGCTCA	tRF-5a	-	-	14	tRNA-Cys-GCA-1-1,GGGGGTATAGCTCAGTGGTAGAGCATTTGACTGCAGATCAAGAGGTCCCTGGTTCAAATCCAGGTGCCCCCTCCA,Cys-GCA,0;tRNA-Cys-GCA-10-1,GGGGGTATAGCTCAGGGGTAGAGCATTTGACTGCAGATCAAGAGGTCCCTGGTTCAAATCCAGATGCCCCCTCCA,Cys-GCA,0;tRNA-Cys-GCA-11-1,GGGGGTATAGCTCAGGGGTAGAGTATTTGGCTGCAGATCAAGAGGTCCCTGGTTCAAATCCAGGTGCCCCCTCCA,Cys-GCA,0;tRNA-Cys-GCA-12-1,GGGGGTATAGCTCAGGGGTAGAGCATTTGACTGCAGATCAAGAGGTCCTTGGTTCAAATCCAGGTGTCCC…	-0.0754067	0.949075	0.895307	1	9.08079	9.15619	473.52	566.844	891.934	298.966	688.26	491.163
tRF-1:22-Lys-TTT-1	GCCCGGATAGCTCAGTCGGTAG	tRF-5b	-	-	22	tRNA-Lys-TTT-1-1,GCCCGGATAGCTCAGTCGGTAGAGCATCAGACTTTTAATCTGAGGGTCCAGGGTTCAAGTCCCTGTTCGGGCGCCA,Lys-TTT,0	-0.082869	0.944178	0.939748	1	5.34042	5.42329	50.7342	60.0188	32.8319	22.6346	29.2186	61.3954
tRF-68:86-Leu-CAA-1-M5	AATCCCACTTCTGACACCA	tRF-3b	-	-	19	tRNA-Leu-CAA-1-1,GTCAGGATGGCCGAGTGGTCTAAGGCGCCAGACTCAAGTTCTGGTCTCCCCTGGAGGCGTGGGTTCGAATCCCACTTCTGACACCA,Leu-CAA,67;tRNA-Leu-CAA-2-1,GTCAGGATGGCCGAGTGGTCTAAGGCGCCAGACTCAAGTTCTGGTCTCCGTATGGAGGCGTGGGTTCGAATCCCACTTCTGACACCA,Leu-CAA,68;tRNA-Leu-CAA-3-1,GTCAGGATGGCCGAGTGGTCTAAGGCGCCAGACTCAAGTTCTGGTCTCCGAATGGAGGCGTGGGTTCGAATCCCACTTCTGACACCA,Leu-CAA,68;tRNA-Leu-CAA-4-1,GTCAGGATGGCCGAGTGGTCTAAGGCGCCAGACTC…	-0.0864009	0.94187	1	1	2.81337	2.89978	0	13.3375	10.944	4.71554	3.24651	7.67442
tRF-+1:T17-Cys-GCA-3-3	AGCAGGCTCACTCTTTT	tRF-1	1009	-	17	pre_tRNA-Cys-GCA-3-3,ACTAGCACCAAGTAGTAACTGACGCAAAGCTACCGGCAGAGGGGGTATAGCTCAGTGGTAGAGCATTTGACTGCAGATCAAGAGGTCCCCGGTTCAAATCCGGGTGCCCCCTAGCAGGCTCACTCTTTTCTTTGGAAGACCTTATTACGTCC,Cys-GCA,112	-0.111638	0.925537	1	1	1.92764	2.03928	0	13.3375	0	3.77244	0	0
tRF-1:31-Pro-AGG-1-M3	GGCTCGTTGGTCTAGGGGTATGATTCTCGCT	tRF-5c	-	-	31	tRNA-Pro-AGG-1-1,GGCTCGTTGGTCTAGGGGTATGATTCTCGCTTAGGGTGCGAGAGGTCCCGGGTTCAAATCCCGGACGAGCCCCCA,Pro-AGG,0;tRNA-Pro-CGG-1-1,GGCTCGTTGGTCTAGGGGTATGATTCTCGCTTCGGGTGCGAGAGGTCCCGGGTTCAAATCCCGGACGAGCCCCCA,Pro-CGG,0;tRNA-Pro-TGG-2-1,GGCTCGTTGGTCTAGGGGTATGATTCTCGCTTTGGGTGCGAGAGGTCCCGGGTTCAAATCCCGGACGAGCCCCCA,Pro-TGG,0	-0.113978	0.924037	0.912628	1	5.40332	5.5173	0	80.0251	76.6078	25.4639	48.6977	38.3721
tRF-1:16-Ile-AAT-1-M4	GGCCGGTTAGCTCAGT	tRF-5a	-	-	16	tRNA-Ile-AAT-1-1,GGCCGGTTAGCTCAGTTGGTTAGAGCGTGGTGCTAATAACGCCAAGGTCGCGGGTTCGATCCCCGTACGGGCCACCA,Ile-AAT,0;tRNA-Ile-AAT-2-1,GGCCGGTTAGCTCAGTTGGTTAGAGCATGGTGCTAATAACGCCAAGGTCACGGGTTCGATCCCCGTATGGGCCACCA,Ile-AAT,0;tRNA-Ile-AAT-3-1,GGCCGGTTAGCTCAGTTGGTTAGAGTGTGGTGCTAATAACGCCAAGGTCGCGGGTTCGATCCCCGTACGGGCCACCA,Ile-AAT,0;tRNA-Ile-AAT-4-1,GGCCGGTTAGCTCAGTTGGTTAGAGCATGGTGCTAATAACGCCAAGGTTGTGGGTTCGATGCCCGTA…	-0.117227	0.921958	0.921549	1	4.84809	4.96531	33.8228	46.6813	21.8879	10.3742	32.4651	53.7209
tRF-68:85-Leu-AAG-3-M2	ATCCCACCACTGCCACCA	tRF-3a	3014a	-	18	tRNA-Leu-AAG-3-1,GGTAGTGTGGCCGAGCGGTCTAAGGCGCTGGATTAAGGCTCCAGTCTCTTCGGGGGCGTGGGTTCGAATCCCACCACTGCCACCA,Leu-AAG,67;tRNA-Leu-TAG-2-1,GGTAGTGTGGCCGAGCGGTCTAAGGCGCTGGATTTAGGCTCCAGTCTCTTCGGAGGCGTGGGTTCGAATCCCACCACTGCCACCA,Leu-TAG,67	-0.118852	0.92092	1	1	3.9485	4.06735	16.9114	26.675	10.944	7.54487	19.4791	15.3488
tRF-1:23-Gly-GCC-1	GCATGGGTGGTTCAGTGGTAGAA	tRF-5b	-	-	23	tRNA-Gly-GCC-1-1,GCATGGGTGGTTCAGTGGTAGAATTCTCGCCTGCCACGCGGGAGGCCCGGGTTCGATTCCCGGCCCATGCACCA,Gly-GCC,0	-0.129068	0.914422	0.927583	1	4.98823	5.1173	16.9114	60.0188	38.3039	13.2035	45.4512	38.3721
tRF-56:76-Tyr-GTA-2-M2	CGATTCCGGCTCGAAGGACCA	tRF-3b	-	-	21	tRNA-Tyr-GTA-2-1,CCTTCGATAGCTCAGTTGGTAGAGCGGAGGACTGTAGATCCTTAGGTCGCTGGTTCGATTCCGGCTCGAAGGACCA,Tyr-GTA,55;tRNA-Tyr-GTA-3-1,CCTTCGATAGCTCAGCTGGTAGAGCGGAGGACTGTAGATCCTTAGGTCGCTGGTTCGATTCCGGCTCGAAGGACCA,Tyr-GTA,55	-0.131706	0.912751	1	1	3.10865	3.24036	5.63714	6.66876	16.416	0	3.24651	38.3721
tRF-59:76-Val-TAC-1	GCCCCAGTGGAACCACCA	tRF-3a	-	-	18	tRNA-Val-TAC-1-1,GGTTCCATAGTGTAGCGGTTATCACGTCTGCTTTACACGCAGAAGGTCCTGGGTTCGAGCCCCAGTGGAACCACCA,Val-TAC,58	-0.135707	0.910224	0.86231	1	5.06136	5.19707	33.8228	33.3438	49.2479	9.43109	51.9442	53.7209
tRF-1:15-Ile-AAT-1-M4	GGCCGGTTAGCTCAG	tRF-5a	-	-	15	tRNA-Ile-AAT-1-1,GGCCGGTTAGCTCAGTTGGTTAGAGCGTGGTGCTAATAACGCCAAGGTCGCGGGTTCGATCCCCGTACGGGCCACCA,Ile-AAT,0;tRNA-Ile-AAT-2-1,GGCCGGTTAGCTCAGTTGGTTAGAGCATGGTGCTAATAACGCCAAGGTCACGGGTTCGATCCCCGTATGGGCCACCA,Ile-AAT,0;tRNA-Ile-AAT-3-1,GGCCGGTTAGCTCAGTTGGTTAGAGTGTGGTGCTAATAACGCCAAGGTCGCGGGTTCGATCCCCGTACGGGCCACCA,Ile-AAT,0;tRNA-Ile-AAT-4-1,GGCCGGTTAGCTCAGTTGGTTAGAGCATGGTGCTAATAACGCCAAGGTTGTGGGTTCGATGCCCGTA…	-0.140618	0.907131	0.815198	1	5.19467	5.33529	33.8228	40.0125	54.7199	8.48798	55.1907	69.0698
tRF-59:76-Ala-AGC-4	TGCCCGCATCCTCCACCA	tRF-3a	3039a	-	18	tRNA-Ala-AGC-4-1,GGGGGATTAGCTCAAATGGTAGAGCGCTCGCTTAGCATGCGAGAGGTAGCGGGATCGATGCCCGCATCCTCCACCA,Ala-AGC,58	-0.14522	0.904242	0.952761	1	5.3516	5.49682	33.8228	106.7	10.944	16.976	81.1628	23.0233
tRF-30:43-Glu-CTC-1-M2	CGCTCTCACCGCCG	tRF-2	-	-	14	tRNA-Glu-CTC-1-1,TCCCTGGTGGTCTAGTGGTTAGGATTCGGCGCTCTCACCGCCGCGGCCCGGGTTCGATTCCCGGTCAGGGAACCA,Glu-CTC,29;tRNA-Glu-CTC-2-1,TCCCTGGTGGTCTAGTGGTTAGGATTTGGCGCTCTCACCGCCGCGGCCTGGGTTCGATTCCCGGTCAGGGAACCA,Glu-CTC,29	-0.147797	0.902628	0.907136	1	5.66539	5.81318	22.5485	66.6876	93.0238	31.1226	48.6977	61.3954
tRF-57:75-Ala-AGC-3	ATCCCCAGCATCTCCACCA	tRF-3b	-	-	19	tRNA-Ala-AGC-3-1,GGGGATGTAGCTCAGTGGTAGAGCGCATGCTTAGCATGCATGAGGTCCTGGGTTCGATCCCCAGCATCTCCACCA,Ala-AGC,56	-0.161832	0.893889	0.798121	1	7.0671	7.22893	107.106	226.738	153.216	33.0088	142.846	314.651
tRF-+1:T16-Arg-ACG-3	ACGTGTGCGATCTTTT	tRF-1	-	-	16	pre_tRNA-Arg-ACG-3-1,ATTGGAGATCACTTATCGTGGAGGAGGCCTCCTCAGCACCGGGCCAGTGGCGCAATGGATAACGCGTCTGACTACGGATCAGAAGATTCTAGGTTCGACTCCTGGCTGGCTCGACGTGTGCGATCTTTTTCCTGAACCTTGGAAGGCCTGCTT,Arg-ACG,113	-0.175202	0.885643	1	1	1.09528	1.27049	0	6.66876	0	1.88622	0	0
tRF-1:15-Ala-AGC-3-M12	GGGGATGTAGCTCAG	tRF-5a	-	-	15	tRNA-Ala-AGC-3-1,GGGGATGTAGCTCAGTGGTAGAGCGCATGCTTAGCATGCATGAGGTCCTGGGTTCGATCCCCAGCATCTCCACCA,Ala-AGC,0;tRNA-Ala-AGC-8-1,GGGGATGTAGCTCAGTGGTAGAGCGCATGCTTAGCATGCATGAGGTCCTGGGTTCGATCTCCAGGTTTTTTTCCA,Ala-AGC,0;tRNA-Ala-CGC-1-1,GGGGATGTAGCTCAGTGGTAGAGCGCATGCTTCGCATGTATGAGGCCCCGGGTTCGATCCCCGGCATCTCCACCA,Ala-CGC,0;tRNA-Ala-CGC-2-1,GGGGATGTAGCTCAGTGGTAGAGCGCGCGCTTCGCATGTGTGAGGTCCCGGGTTCAATCCCCGGCATCTCCAC…	-0.183834	0.88036	0.785705	1	6.18755	6.37139	84.5571	60.0188	109.44	33.9519	103.888	92.093
tRF-55:76-Tyr-GTA-4	TCGACTCCGGCTCGAAGGACCA	tRF-3b	-	-	22	tRNA-Tyr-GTA-4-1,CCTTCGATAGCTCAGCTGGTAGAGCGGAGGACTGTAGATCCTTAGGTCGCTGGTTCGACTCCGGCTCGAAGGACCA,Tyr-GTA,54	-0.184435	0.879994	1	1	3.38545	3.56988	16.9114	6.66876	10.944	2.82933	22.7256	7.67442
tRF-57:75-Gln-CTG-2	AATCTCGGTGGAACCTCCA	tRF-3b	-	-	19	tRNA-Gln-CTG-2-1,GGTTCCATGGTGTAATGGTTAGCACTCTGGACTCTGAATCCAGCGATCCGAGTTCAAATCTCGGTGGAACCTCCA,Gln-CTG,56	-0.18732	0.878236	0.884988	1	5.21315	5.40047	50.7342	40.0125	38.3039	29.2364	42.2046	15.3488
tRF-1:24-Ala-AGC-1-M3	GGGGGTGTAGCTCAGTGGTAGAGC	tRF-5b	-	-	24	tRNA-Ala-AGC-1-1,GGGGGTGTAGCTCAGTGGTAGAGCGCGTGCTTAGCATGCACGAGGCCCTGGGTTCGATCCCCAGCACCTCCACCA,Ala-AGC,0;tRNA-Ala-AGC-2-1,GGGGGTGTAGCTCAGTGGTAGAGCGCGTGCTTAGCATGCACGAGGCCCCGGGTTCAATCCCCGGCACCTCCACCA,Ala-AGC,0;tRNA-Ala-TGC-1-1,GGGGGTGTAGCTCAGTGGTAGAGCGCATGCTTTGCATGCATGAGGCCCCGGGTTCGATCCCCGGCACCTCCACCA,Ala-TGC,0	-0.188575	0.877472	1	1	3.60432	3.79289	11.2743	26.675	5.47199	5.65865	25.9721	0
tRF-60:76-Val-TAC-1	CCCCAGTGGAACCACCA	tRF-3a	-	-	17	tRNA-Val-TAC-1-1,GGTTCCATAGTGTAGCGGTTATCACGTCTGCTTTACACGCAGAAGGTCCTGGGTTCGAGCCCCAGTGGAACCACCA,Val-TAC,59	-0.201815	0.869456	1	1	3.77861	3.98043	16.9114	13.3375	16.416	6.60176	29.2186	0
tRF-59:75-Pro-AGG-1-M4	TCCCGGACGAGCCCCCA	tRF-3a	-	-	17	tRNA-Pro-AGG-1-1,GGCTCGTTGGTCTAGGGGTATGATTCTCGCTTAGGGTGCGAGAGGTCCCGGGTTCAAATCCCGGACGAGCCCCCA,Pro-AGG,58;tRNA-Pro-CGG-1-1,GGCTCGTTGGTCTAGGGGTATGATTCTCGCTTCGGGTGCGAGAGGTCCCGGGTTCAAATCCCGGACGAGCCCCCA,Pro-CGG,58;tRNA-Pro-TGG-1-1,GGCTCGTTGGTCTAGGGGTATGATTCTCGGTTTGGGTCCGAGAGGTCCCGGGTTCAAATCCCGGACGAGCCCCCA,Pro-TGG,58;tRNA-Pro-TGG-2-1,GGCTCGTTGGTCTAGGGGTATGATTCTCGCTTTGGGTGCGAGAGGTCCCGGGTTCAAATCCCGGACGAGC…	-0.20235	0.869134	0.754104	0.985316	6.18142	6.38377	50.7342	106.7	103.968	27.3502	100.642	122.791
tRF-68:85-Ser-AGA-3	ATCCTGCTGACTATGCCA	tRF-3a	-	-	18	tRNA-Ser-AGA-3-1,GTAGTCGTGGCCAAGTGAGTAAGGCAATGGACTAGAAATCCATTGGGGTCTCCCAGCACAGGTTCAAATCCTGCTGACTATGCCA,Ser-AGA,67	-0.203179	0.868635	0.862147	1	3.57988	3.78306	11.2743	6.66876	21.8879	5.65865	6.49302	30.6977
tRF-54:75-Ala-AGC-2	TCAATCCCCGGCACCTCCACCA	tRF-3b	-	-	22	tRNA-Ala-AGC-2-1,GGGGGTGTAGCTCAGTGGTAGAGCGCGTGCTTAGCATGCACGAGGCCCCGGGTTCAATCCCCGGCACCTCCACCA,Ala-AGC,53	-0.204507	0.867835	0.689144	0.933461	9.27584	9.48034	529.891	960.301	755.134	200.882	766.177	1235.58
tRF-1:31-Glu-TTC-2	TCCCATATGGTCTAGCGGTTAGGATTCCTGG	tRF-5c	-	-	31	tRNA-Glu-TTC-2-1,TCCCATATGGTCTAGCGGTTAGGATTCCTGGTTTTCACCCAGGCGGCCCGGGTTCGACTCCCGGTATGGGAACCA,Glu-TTC,0	-0.209369	0.864915	0.739678	0.973353	8.04153	8.2509	321.317	193.394	404.927	217.858	266.214	199.535
tRF-1:29-Cys-GCA-10-M9	GGGGGTATAGCTCAGGGGTAGAGCATTTG	tRF-5c	-	-	29	tRNA-Cys-GCA-10-1,GGGGGTATAGCTCAGGGGTAGAGCATTTGACTGCAGATCAAGAGGTCCCTGGTTCAAATCCAGATGCCCCCTCCA,Cys-GCA,0;tRNA-Cys-GCA-12-1,GGGGGTATAGCTCAGGGGTAGAGCATTTGACTGCAGATCAAGAGGTCCTTGGTTCAAATCCAGGTGTCCCCTCCA,Cys-GCA,0;tRNA-Cys-GCA-14-1,GGGGGTATAGCTCAGGGGTAGAGCATTTGACTGCAGATCAAGAGGTCCCTAGTTCAAATCCAGGTGCCCCCTCCA,Cys-GCA,0;tRNA-Cys-GCA-24-1,GGGGGTATAGCTCAGGGGTAGAGCATTTGACTGCAGATCACGAGGTCCCTGGTTCAAATCGAGGTGCCC…	-0.23187	0.851531	0.865441	1	5.45739	5.68926	73.2828	26.675	49.2479	49.9848	3.24651	38.3721
tRF-60:77-Ile-AAT-1-M2	TCCCCGTACGGGCCACCA	tRF-3a	3038a	-	18	tRNA-Ile-AAT-1-1,GGCCGGTTAGCTCAGTTGGTTAGAGCGTGGTGCTAATAACGCCAAGGTCGCGGGTTCGATCCCCGTACGGGCCACCA,Ile-AAT,59;tRNA-Ile-AAT-3-1,GGCCGGTTAGCTCAGTTGGTTAGAGTGTGGTGCTAATAACGCCAAGGTCGCGGGTTCGATCCCCGTACGGGCCACCA,Ile-AAT,59	-0.237347	0.848304	0.666032	0.919427	7.98677	8.22411	186.026	500.157	246.239	138.637	282.446	399.07
tRF-1:23-Gly-GCC-2-M3	GCATTGGTGGTTCAGTGGTAGAA	tRF-5b	-	-	23	tRNA-Gly-GCC-2-1,GCATTGGTGGTTCAGTGGTAGAATTCTCGCCTGCCACGCGGGAGGCCCGGGTTCGATTCCCGGCCAATGCACCA,Gly-GCC,0;tRNA-Gly-GCC-3-1,GCATTGGTGGTTCAGTGGTAGAATTCTCGCCTGCCACGCGGGAGGCCCGGGTTTGATTCCCGGCCAATGCACCA,Gly-GCC,0;tRNA-Gly-GCC-4-1,GCATTGGTGGTTCAGTGGTAGAATTCTCGCCTGCCACGCGGGAGGCCCGGGTTCGGTTCCCGGCCAATGCACCA,Gly-GCC,0	-0.240832	0.846257	0.826764	1	5.10693	5.34776	28.1857	13.3375	76.6078	13.2035	64.9302	38.3721
tRF-68:85-Ser-AGA-1-M3	ATCCTGCCGACTACGCCA	tRF-3a	3025a	-	18	tRNA-Ser-AGA-1-1,GTAGTCGTGGCCGAGTGGTTAAGGCGATGGACTAGAAATCCATTGGGGTTTCCCCGCGCAGGTTCGAATCCTGCCGACTACGCCA,Ser-AGA,67;tRNA-Ser-AGA-2-1,GTAGTCGTGGCCGAGTGGTTAAGGCGATGGACTAGAAATCCATTGGGGTCTCCCCGCGCAGGTTCGAATCCTGCCGACTACGCCA,Ser-AGA,67;tRNA-Ser-TGA-2-1,GTAGTCGTGGCCGAGTGGTTAAGGCGATGGACTTGAAATCCATTGGGGTTTCCCCGCGCAGGTTCGAATCCTGCCGACTACGCCA,Ser-TGA,67	-0.241736	0.845727	0.639346	0.919427	8.9738	9.21554	338.228	880.276	623.806	252.753	590.865	828.837
tRF-1:30-Glu-CTC-1	TCCCTGGTGGTCTAGTGGTTAGGATTCGGC	tRF-5c	-	-	30	tRNA-Glu-CTC-1-1,TCCCTGGTGGTCTAGTGGTTAGGATTCGGCGCTCTCACCGCCGCGGCCCGGGTTCGATTCCCGGTCAGGGAACCA,Glu-CTC,0	-0.247383	0.842423	0.663886	0.919427	11.7034	11.9508	4216.58	3267.69	4240.79	2838.76	2902.38	3323.02
tRF-1:30-Gly-GCC-1	GCATGGGTGGTTCAGTGGTAGAATTCTCGC	tRF-5c	-	-	30	tRNA-Gly-GCC-1-1,GCATGGGTGGTTCAGTGGTAGAATTCTCGCCTGCCACGCGGGAGGCCCGGGTTCGATTCCCGGCCCATGCACCA,Gly-GCC,0	-0.249391	0.841251	0.684812	0.929868	13.203	13.4524	10597.8	8876.11	13822.2	8376.69	10892	5533.26
tRF-59:76-Arg-TCT-2	ATCCCACCAGAGTCGCCA	tRF-3a	-	-	18	tRNA-Arg-TCT-2-1,GGCTCTGTGGCGCAATGGATAGCGCATTGGACTTCTAATTCAAAGGTTGTGGGTTCGAATCCCACCAGAGTCGCCA,Arg-TCT,58	-0.262934	0.833391	0.724082	0.963678	5.06323	5.32616	28.1857	46.6813	43.7759	17.9191	38.9581	53.7209
tRF-59:76-Arg-ACG-1-M2	CTCCTGGCTGGCTCGCCA	tRF-3a	3030a	-	18	tRNA-Arg-ACG-1-1,GGGCCAGTGGCGCAATGGATAACGCGTCTGACTACGGATCAGAAGATTCCAGGTTCGACTCCTGGCTGGCTCGCCA,Arg-ACG,58;tRNA-Arg-ACG-3-1,GGGCCAGTGGCGCAATGGATAACGCGTCTGACTACGGATCAGAAGATTCTAGGTTCGACTCCTGGCTGGCTCGCCA,Arg-ACG,58	-0.268155	0.830381	0.707334	0.948821	6.51525	6.78341	62.0085	106.7	158.688	52.8141	181.805	46.0465
tRF-54:75-iMet-CAT-1-M3	TCGAAACCATCCTCTGCTACCA	tRF-3b	3008a	-	22	tRNA-iMet-CAT-1-1,AGCAGAGTGGCGCAGCGGAAGCGTGCTGGGCCCATAACCCAGAGGTCGATGGATCGAAACCATCCTCTGCTACCA,iMet-CAT,53;tRNA-iMet-CAT-2-1,AGCAGAGTGGCGCAGCGGAAGCATGCTGGGCCCATAACCCAGAGGTCGATGGATCGAAACCATCCTCTGCTACCA,iMet-CAT,53;tRNA-iMet-CAT-3-1,AGCAGAGTGGCGCAGCGGAAGCGTGCTGGGCCCATAACCCAGAGGTCGATAGATCGAAACCATCCTCTGCTACCA,iMet-CAT,53	-0.279398	0.823935	0.841269	1	5.10514	5.38453	11.2743	46.6813	65.6638	20.7484	71.4232	7.67442
tRF-1:29-Gln-CTG-1-M3	GGTTCCATGGTGTAATGGTTAGCACTCTG	tRF-5c	-	-	29	tRNA-Gln-CTG-1-1,GGTTCCATGGTGTAATGGTTAGCACTCTGGACTCTGAATCCAGCGACCCGAGTTCAAATCTCGGTGGGACCTCCA,Gln-CTG,0;tRNA-Gln-CTG-2-1,GGTTCCATGGTGTAATGGTTAGCACTCTGGACTCTGAATCCAGCGATCCGAGTTCAAATCTCGGTGGAACCTCCA,Gln-CTG,0;tRNA-Gln-CTG-3-1,GGTTCCATGGTGTAATGGTTAGCACTCTGGACTCTGAATCCAGCGATCCGAGTTCAAATCTCGGTGGGACCTCCA,Gln-CTG,0	-0.28316	0.821789	0.711261	0.951784	8.15654	8.4397	529.891	226.738	218.879	311.226	194.791	168.837
tRF-60:76-Arg-TCT-5	TCCCGCCAGAGTCGCCA	tRF-3a	-	-	17	tRNA-Arg-TCT-5-1,GGCTCTGTGGCGCAATGGATAGCGCATTGGACTTCTAATTCAAAGGTTGCGGGTTCGAGTCCCGCCAGAGTCGCCA,Arg-TCT,59	-0.289416	0.818233	0.6631	0.919427	5.59413	5.88354	33.8228	86.6938	54.7199	21.6915	77.9163	69.0698
tRF-1:15-Cys-GCA-1-M16	GGGGGTATAGCTCAG	tRF-5a	-	-	15	tRNA-Cys-GCA-1-1,GGGGGTATAGCTCAGTGGTAGAGCATTTGACTGCAGATCAAGAGGTCCCTGGTTCAAATCCAGGTGCCCCCTCCA,Cys-GCA,0;tRNA-Cys-GCA-10-1,GGGGGTATAGCTCAGGGGTAGAGCATTTGACTGCAGATCAAGAGGTCCCTGGTTCAAATCCAGATGCCCCCTCCA,Cys-GCA,0;tRNA-Cys-GCA-11-1,GGGGGTATAGCTCAGGGGTAGAGTATTTGGCTGCAGATCAAGAGGTCCCTGGTTCAAATCCAGGTGCCCCCTCCA,Cys-GCA,0;tRNA-Cys-GCA-12-1,GGGGGTATAGCTCAGGGGTAGAGCATTTGACTGCAGATCAAGAGGTCCTTGGTTCAAATCCAGGTGTCCC…	-0.289487	0.818193	0.572174	0.887911	9.47452	9.76401	636.997	946.963	974.014	426.285	1181.73	690.698
tRF-59:76-Arg-TCT-5	GTCCCGCCAGAGTCGCCA	tRF-3a	-	-	18	tRNA-Arg-TCT-5-1,GGCTCTGTGGCGCAATGGATAGCGCATTGGACTTCTAATTCAAAGGTTGCGGGTTCGAGTCCCGCCAGAGTCGCCA,Arg-TCT,58	-0.292388	0.816549	0.767868	0.993923	4.67512	4.96751	33.8228	40.0125	16.416	7.54487	45.4512	46.0465
tRF-1:24-Ala-AGC-3-M8	GGGGATGTAGCTCAGTGGTAGAGC	tRF-5b	5011b	-	24	tRNA-Ala-AGC-3-1,GGGGATGTAGCTCAGTGGTAGAGCGCATGCTTAGCATGCATGAGGTCCTGGGTTCGATCCCCAGCATCTCCACCA,Ala-AGC,0;tRNA-Ala-AGC-8-1,GGGGATGTAGCTCAGTGGTAGAGCGCATGCTTAGCATGCATGAGGTCCTGGGTTCGATCTCCAGGTTTTTTTCCA,Ala-AGC,0;tRNA-Ala-CGC-1-1,GGGGATGTAGCTCAGTGGTAGAGCGCATGCTTCGCATGTATGAGGCCCCGGGTTCGATCCCCGGCATCTCCACCA,Ala-CGC,0;tRNA-Ala-CGC-2-1,GGGGATGTAGCTCAGTGGTAGAGCGCGCGCTTCGCATGTGTGAGGTCCCGGGTTCAATCCCCGGCATCTCCAC…	-0.293894	0.815698	0.630334	0.915977	6.35021	6.64411	39.46	113.369	142.272	33.9519	129.86	130.465
tRF-1:24-Tyr-GTA-1-M2	CCTTCGATAGCTCAGTTGGTAGAG	tRF-5b	-	-	24	tRNA-Tyr-GTA-1-1,CCTTCGATAGCTCAGTTGGTAGAGCGGAGGACTGTAGATCCTTAGGTCGCTGGTTCGAATCCGGCTCGAAGGACCA,Tyr-GTA,0;tRNA-Tyr-GTA-2-1,CCTTCGATAGCTCAGTTGGTAGAGCGGAGGACTGTAGATCCTTAGGTCGCTGGTTCGATTCCGGCTCGAAGGACCA,Tyr-GTA,0	-0.295586	0.814741	0.662893	0.919427	5.7939	6.08948	67.6456	80.0251	49.2479	33.9519	90.9023	46.0465
tRF-55:76-Phe-GAA-1	TCGATCCCGGGTTTCGGCACCA	tRF-3b	-	-	22	tRNA-Phe-GAA-1-1,GCCGAAATAGCTCAGTTGGGAGAGCGTTAGACTGAAGATCTAAAGGTCCCTGGTTCGATCCCGGGTTTCGGCACCA,Phe-GAA,54	-0.306689	0.808495	0.621341	0.915145	5.55891	5.8656	62.0085	60.0188	43.7759	18.8622	55.1907	107.442
tRF-1:30-Gly-GCC-2-M3	GCATTGGTGGTTCAGTGGTAGAATTCTCGC	tRF-5c	-	-	30	tRNA-Gly-GCC-2-1,GCATTGGTGGTTCAGTGGTAGAATTCTCGCCTGCCACGCGGGAGGCCCGGGTTCGATTCCCGGCCAATGCACCA,Gly-GCC,0;tRNA-Gly-GCC-3-1,GCATTGGTGGTTCAGTGGTAGAATTCTCGCCTGCCACGCGGGAGGCCCGGGTTTGATTCCCGGCCAATGCACCA,Gly-GCC,0;tRNA-Gly-GCC-4-1,GCATTGGTGGTTCAGTGGTAGAATTCTCGCCTGCCACGCGGGAGGCCCGGGTTCGGTTCCCGGCCAATGCACCA,Gly-GCC,0	-0.30687	0.808393	0.625063	0.915977	14.837	15.1439	33817.2	27848.7	41587.1	28257.4	31737.9	18226.7
tRF-65:86-Leu-CAG-1-M3	TCGAATCCCACTCCTGACACCA	tRF-3b	3017b	-	22	tRNA-Leu-CAG-1-1,GTCAGGATGGCCGAGCGGTCTAAGGCGCTGCGTTCAGGTCGCAGTCTCCCCTGGAGGCGTGGGTTCGAATCCCACTCCTGACACCA,Leu-CAG,64;tRNA-Leu-CAG-3-1,GTCAGGATGGCCGAGTGGTCTAAGGAGCTGTGTTCAGGTCGCAGTCTCCCCTGGAGGCGTGGGTTCGAATCCCACTCCTGACACCA,Leu-CAG,64;tRNA-Leu-CAG-4-1,GTCAGGATGGCCGAGCAGTCTAAGGCACTGCGTTCAGGTCGCAGTCTCCCCTGGAGGCGTGGATTCGAATCCCACTCCTGACACCA,Leu-CAG,64	-0.312917	0.805012	0.668621	0.919427	5.07028	5.38319	28.1857	60.0188	32.8319	16.976	51.9442	46.0465
tRF-1:28-Glu-CTC-2	TCCCTGGTGGTCTAGTGGTTAGGATTTG	tRF-5c	-	-	28	tRNA-Glu-CTC-2-1,TCCCTGGTGGTCTAGTGGTTAGGATTTGGCGCTCTCACCGCCGCGGCCTGGGTTCGATTCCCGGTCAGGGAACCA,Glu-CTC,0	-0.335526	0.792495	0.897292	1	3.95516	4.29069	11.2743	40.0125	5.47199	15.0897	12.986	7.67442
tRF-59:75-His-GTG-2-M2	TCCGAGTCACGGCACCA	tRF-3a	-	-	17	tRNA-His-GTG-2-1,GCCGTGATCGTATAGTGGTTAGTACTCTGCGTTGTGGCCGCAGCAACCTCGGTTCGAATCCGAGTCACGGCACCA,His-GTG,58;tRNA-His-GTG-3-1,GCCGTGATCGTATAGGGGTTAGTACTCTGCGTTGTGGCCGCAGCAACCTCGGTTCGAATCCGAGTCACGGCACCA,His-GTG,58	-0.343153	0.788317	0.879696	1	3.78951	4.13267	22.5485	13.3375	10.944	11.3173	6.49302	23.0233
tRF-1:30-Glu-TTC-1	TCCCACATGGTCTAGCGGTTAGGATTCCTG	tRF-5c	-	-	30	tRNA-Glu-TTC-1-1,TCCCACATGGTCTAGCGGTTAGGATTCCTGGTTTTCACCCAGGCGGCCCGGGTTCGACTCCCGGTGTGGGAACCA,Glu-TTC,0	-0.346592	0.78644	0.556878	0.87898	8.89006	9.23666	597.537	340.107	716.83	438.546	473.991	445.116
tRF-1:22-Tyr-GTA-1-M2	CCTTCGATAGCTCAGTTGGTAG	tRF-5b	-	-	22	tRNA-Tyr-GTA-1-1,CCTTCGATAGCTCAGTTGGTAGAGCGGAGGACTGTAGATCCTTAGGTCGCTGGTTCGAATCCGGCTCGAAGGACCA,Tyr-GTA,0;tRNA-Tyr-GTA-2-1,CCTTCGATAGCTCAGTTGGTAGAGCGGAGGACTGTAGATCCTTAGGTCGCTGGTTCGATTCCGGCTCGAAGGACCA,Tyr-GTA,0	-0.353665	0.782594	0.822004	1	3.92841	4.28207	0	40.0125	16.416	5.65865	6.49302	53.7209
tRF-59:75-Thr-CGT-1-M2	CCCCGTCCGTGCCTCCA	tRF-3a	-	-	17	tRNA-Thr-CGT-1-1,GGCGCGGTGGCCAAGTGGTAAGGCGTCGGTCTCGTAAACCGAAGATCACGGGTTCGAACCCCGTCCGTGCCTCCA,Thr-CGT,58;tRNA-Thr-CGT-2-1,GGCGCGGTGGCCAAGTGGTAAGGCGTCGGTCTCGTAAACCGAAGATCGCGGGTTCGAACCCCGTCCGTGCCTCCA,Thr-CGT,58	-0.360582	0.77885	0.725368	0.963678	4.34669	4.70727	11.2743	46.6813	16.416	12.2604	25.9721	30.6977
tRF-59:76-Tyr-GTA-4	CTCCGGCTCGAAGGACCA	tRF-3a	-	-	18	tRNA-Tyr-GTA-4-1,CCTTCGATAGCTCAGCTGGTAGAGCGGAGGACTGTAGATCCTTAGGTCGCTGGTTCGACTCCGGCTCGAAGGACCA,Tyr-GTA,58	-0.361334	0.778444	0.582139	0.890898	5.9287	6.29003	62.0085	133.375	27.3599	31.1226	90.9023	99.7675
tRF-1:32-Val-AAC-5	GTTTCCGTAGTGTAGTGGTTATCACATTCGCC	tRF-5c	-	-	32	tRNA-Val-AAC-5-1,GTTTCCGTAGTGTAGTGGTTATCACATTCGCCTAACACGCGAAAGGTCCCCGGTTCGAAACCGGGCGGAAACACCA,Val-AAC,0	-0.362279	0.777935	0.657047	0.919427	4.83236	5.19464	16.9114	53.35	32.8319	11.3173	35.7116	69.0698
tRF-1:30-Cys-GCA-10-M9	GGGGGTATAGCTCAGGGGTAGAGCATTTGA	tRF-5c	-	-	30	tRNA-Cys-GCA-10-1,GGGGGTATAGCTCAGGGGTAGAGCATTTGACTGCAGATCAAGAGGTCCCTGGTTCAAATCCAGATGCCCCCTCCA,Cys-GCA,0;tRNA-Cys-GCA-12-1,GGGGGTATAGCTCAGGGGTAGAGCATTTGACTGCAGATCAAGAGGTCCTTGGTTCAAATCCAGGTGTCCCCTCCA,Cys-GCA,0;tRNA-Cys-GCA-14-1,GGGGGTATAGCTCAGGGGTAGAGCATTTGACTGCAGATCAAGAGGTCCCTAGTTCAAATCCAGGTGCCCCCTCCA,Cys-GCA,0;tRNA-Cys-GCA-24-1,GGGGGTATAGCTCAGGGGTAGAGCATTTGACTGCAGATCACGAGGTCCCTGGTTCAAATCGAGGTGCCC…	-0.365581	0.776156	0.616512	0.915145	5.00007	5.36565	45.0971	26.675	38.3039	22.6346	29.2186	53.7209
tRF-1:30-His-GTG-2	GCCGTGATCGTATAGTGGTTAGTACTCTGC	tRF-5c	-	-	30	tRNA-His-GTG-2-1,GCCGTGATCGTATAGTGGTTAGTACTCTGCGTTGTGGCCGCAGCAACCTCGGTTCGAATCCGAGTCACGGCACCA,His-GTG,0	-0.380248	0.768305	0.505783	0.861343	8.32066	8.70091	456.608	406.794	262.655	285.762	272.707	414.419
tRF-1:30-Ala-CGC-5	TCCCTGGTAGTCTAGTGGTTAGGATTCGGT	tRF-5c	-	-	30	tRNA-Ala-CGC-5-1,TCCCTGGTAGTCTAGTGGTTAGGATTCGGTGCTCGCACCGCCGTGGCCCAGGTTTGAATCCTAGTCAGGGAACCA,Ala-CGC,0	-0.383937	0.766343	0.486603	0.855803	8.82489	9.20883	529.891	493.488	580.031	416.854	409.06	537.209
tRF-65:86-Leu-CAA-1-M5	TCGAATCCCACTTCTGACACCA	tRF-3b	3018b	-	22	tRNA-Leu-CAA-1-1,GTCAGGATGGCCGAGTGGTCTAAGGCGCCAGACTCAAGTTCTGGTCTCCCCTGGAGGCGTGGGTTCGAATCCCACTTCTGACACCA,Leu-CAA,64;tRNA-Leu-CAA-2-1,GTCAGGATGGCCGAGTGGTCTAAGGCGCCAGACTCAAGTTCTGGTCTCCGTATGGAGGCGTGGGTTCGAATCCCACTTCTGACACCA,Leu-CAA,65;tRNA-Leu-CAA-3-1,GTCAGGATGGCCGAGTGGTCTAAGGCGCCAGACTCAAGTTCTGGTCTCCGAATGGAGGCGTGGGTTCGAATCCCACTTCTGACACCA,Leu-CAA,65;tRNA-Leu-CAA-4-1,GTCAGGATGGCCGAGTGGTCTAAGGCGCCAGACTC…	-0.392884	0.761605	0.471408	0.842451	7.06302	7.45591	107.106	206.731	169.632	53.7572	172.065	314.651
tRF-1:15-Lys-TTT-1	GCCCGGATAGCTCAG	tRF-5a	-	-	15	tRNA-Lys-TTT-1-1,GCCCGGATAGCTCAGTCGGTAGAGCATCAGACTTTTAATCTGAGGGTCCAGGGTTCAAGTCCCTGTTCGGGCGCCA,Lys-TTT,0	-0.402842	0.756367	0.447295	0.821217	7.91511	8.31795	236.76	253.413	366.623	146.182	409.06	306.977
tRF-1:23-Val-AAC-4-M2	GTTTCTGTAGTGTAGTGGTTATC	tRF-5b	-	-	23	tRNA-Val-AAC-4-1,GTTTCTGTAGTGTAGTGGTTATCACGCTCGCCTAACACGCGAGAGGTCCCCGGTTCGAAACCGGGCAGAAACACCA,Val-AAC,0;tRNA-Val-CAC-4-1,GTTTCTGTAGTGTAGTGGTTATCACGTTCGCCTCACACGCGAAAGGTCCCCGGTTCGAAACCGGGCAGAAACACCA,Val-CAC,0	-0.407718	0.753815	0.674448	0.922578	4.09962	4.50734	22.5485	26.675	10.944	11.3173	22.7256	23.0233
tRF-1:15-Leu-TAA-2	ACCAGGATGGCCGAG	tRF-5a	-	-	15	tRNA-Leu-TAA-2-1,ACCAGGATGGCCGAGTGGTTAAGGCGTTGGACTTAAGATCCAATGGACATATGTCTGCGTGGGTTCGAACCCCACTCCTGGTACCA,Leu-TAA,0	-0.409272	0.753003	0.760242	0.990998	3.59956	4.00883	16.9114	13.3375	10.944	1.88622	19.4791	38.3721
tRF-68:85-Ser-GCT-1	ATCCCACCTTCGTCGCCA	tRF-3a	3016a	-	18	tRNA-Ser-GCT-1-1,GACGAGGTGGCCGAGTGGTTAAGGCGATGGACTGCTAATCCATTGTGCTCTGCACGCGTGGGTTCGAATCCCACCTTCGTCGCCA,Ser-GCT,67	-0.41098	0.752112	0.794283	1	3.77183	4.18281	0	40.0125	10.944	4.71554	32.4651	15.3488
tRF-1:14-Gly-CCC-3-M5	GCATTGGTGGTTCA	tRF-5a	-	-	14	tRNA-Gly-CCC-3-1,GCATTGGTGGTTCAATGGTAGAATTCTCGCCTCCCACGCGGGTGACCCGGGTTCGATTCCCGGCCAATGCACCA,Gly-CCC,0;tRNA-Gly-CCC-4-1,GCATTGGTGGTTCAATGGTAGAATTCTCGCCTCCCACTCGGGTGACCCGGGTTCGATTCCCGGCCAATGCACCA,Gly-CCC,0;tRNA-Gly-GCC-2-1,GCATTGGTGGTTCAGTGGTAGAATTCTCGCCTGCCACGCGGGAGGCCCGGGTTCGATTCCCGGCCAATGCACCA,Gly-GCC,0;tRNA-Gly-GCC-3-1,GCATTGGTGGTTCAGTGGTAGAATTCTCGCCTGCCACGCGGGAGGCCCGGGTTTGATTCCCGGCCAATGCACCA,G…	-0.415114	0.74996	0.579175	0.890898	5.87036	6.28548	11.2743	93.3626	109.44	46.2123	61.6837	84.4186
tRF-1:23-Lys-TTT-1	GCCCGGATAGCTCAGTCGGTAGA	tRF-5b	-	-	23	tRNA-Lys-TTT-1-1,GCCCGGATAGCTCAGTCGGTAGAGCATCAGACTTTTAATCTGAGGGTCCAGGGTTCAAGTCCCTGTTCGGGCGCCA,Lys-TTT,0	-0.416508	0.749236	0.61356	0.915145	4.08264	4.49915	11.2743	26.675	21.8879	3.77244	29.2186	46.0465
tRF-1:29-Gly-GCC-1	GCATGGGTGGTTCAGTGGTAGAATTCTCG	tRF-5c	-	-	29	tRNA-Gly-GCC-1-1,GCATGGGTGGTTCAGTGGTAGAATTCTCGCCTGCCACGCGGGAGGCCCGGGTTCGATTCCCGGCCCATGCACCA,Gly-GCC,0	-0.42286	0.745944	0.546462	0.869659	13.0375	13.4604	14109.8	5274.99	9433.7	10006.4	7590.34	4712.09
tRF-1:15-Ser-AGA-1-M3	GTAGTCGTGGCCGAG	tRF-5a	-	-	15	tRNA-Ser-AGA-1-1,GTAGTCGTGGCCGAGTGGTTAAGGCGATGGACTAGAAATCCATTGGGGTTTCCCCGCGCAGGTTCGAATCCTGCCGACTACGCCA,Ser-AGA,0;tRNA-Ser-AGA-2-1,GTAGTCGTGGCCGAGTGGTTAAGGCGATGGACTAGAAATCCATTGGGGTCTCCCCGCGCAGGTTCGAATCCTGCCGACTACGCCA,Ser-AGA,0;tRNA-Ser-TGA-2-1,GTAGTCGTGGCCGAGTGGTTAAGGCGATGGACTTGAAATCCATTGGGGTTTCCCCGCGCAGGTTCGAATCCTGCCGACTACGCCA,Ser-TGA,0	-0.424572	0.74506	0.402361	0.764507	10.0158	10.4404	1093.6	1553.82	1072.51	518.71	1204.46	2340.7
tRF-61:77-Gly-ACC-1-M6	ACCGGGCGGAAACACCA	tRF-3a	3009a	-	17	tRNA-Gly-ACC-1-1,GTTTCCGTAGTGTAGTGGTTAGCGCGTTCGCCTACCAAAGCGAAAGGTCCCCGGTTCGAAACCGGGCGGAAACACCA,Gly-ACC,60;tRNA-Val-AAC-1-1,GTTTCCGTAGTGTAGTGGTTATCACGTTCGCCTAACACGCGAAAGGTCCCCGGTTCGAAACCGGGCGGAAACACCA,Val-AAC,59;tRNA-Val-AAC-2-1,GTTTCCGTAGTGTAGTGGTCATCACGCTCGCCTAACACGCGAGAGGTCCCCGGTTCGAAACCGGGCGGAAACACCA,Val-AAC,59;tRNA-Val-AAC-5-1,GTTTCCGTAGTGTAGTGGTTATCACATTCGCCTAACACGCGAAAGGTCCCCGGTTCGAAACCGGGC…	-0.432533	0.74096	0.394989	0.75938	9.38183	9.81437	484.794	1040.33	902.878	304.624	1282.37	1051.4
tRF-1:14-Ala-AGC-6-M2	GGGGAATTAGCTCA	tRF-5a	-	-	14	tRNA-Ala-AGC-6-1,GGGGAATTAGCTCAAATGGTAGAGCGCTCGCTTAGCATGCGAGAGGTAGCGGGATCGATGCCCGCATTCTCCACCA,Ala-AGC,0;tRNA-Ala-AGC-7-1,GGGGAATTAGCTCAAATGGTAGAGCGCTCGCTTAGCATGTGAGAGGTAGCGGGATCGATGCCCGCATTCTCCACCA,Ala-AGC,0	-0.434428	0.739987	0.424353	0.794228	7.83388	8.26831	214.211	253.413	344.735	120.718	480.484	260.93
tRF-1:15-Gly-CCC-1	GCGCCGCTGGTGTAG	tRF-5a	-	-	15	tRNA-Gly-CCC-1-1,GCGCCGCTGGTGTAGTGGTATCATGCAAGATTCCCATTCTTGCGACCCGGGTTCGATTCCCGGGCGGCGCACCA,Gly-CCC,0	-0.438048	0.738133	1	1	1.92671	2.36475	0	13.3375	0	3.77244	3.24651	0
tRF-1:29-Val-AAC-4	GTTTCTGTAGTGTAGTGGTTATCACGCTC	tRF-5c	-	-	29	tRNA-Val-AAC-4-1,GTTTCTGTAGTGTAGTGGTTATCACGCTCGCCTAACACGCGAGAGGTCCCCGGTTCGAAACCGGGCAGAAACACCA,Val-AAC,0	-0.438048	0.738133	1	1	1.92671	2.36475	0	13.3375	0	3.77244	3.24651	0
tRF-1:15-Leu-AAG-1-M3	GGTAGCGTGGCCGAG	tRF-5a	-	-	15	tRNA-Leu-AAG-1-1,GGTAGCGTGGCCGAGCGGTCTAAGGCGCTGGATTAAGGCTCCAGTCTCTTCGGGGGCGTGGGTTCGAATCCCACCGCTGCCACCA,Leu-AAG,0;tRNA-Leu-TAG-1-1,GGTAGCGTGGCCGAGCGGTCTAAGGCGCTGGATTTAGGCTCCAGTCTCTTCGGAGGCGTGGGTTCGAATCCCACCGCTGCCACCA,Leu-TAG,0;tRNA-Leu-TAG-3-1,GGTAGCGTGGCCGAGTGGTCTAAGGCGCTGGATTTAGGCTCCAGTCATTTCGATGGCGTGGGTTCGAATCCCACCGCTGCCACCA,Leu-TAG,0	-0.440884	0.736683	0.396139	0.75938	8.60182	9.0427	422.785	533.5	432.287	131.092	720.725	790.465
tRF-60:76-Thr-TGT-2-M2	TCTCGCTGGGGCCTCCA	tRF-3a	-	-	17	tRNA-Thr-TGT-2-1,GGCCCTATAGCTCAGGGGTTAGAGCACTGGTCTTGTAAACCAGGGGTCGCGAGTTCAAATCTCGCTGGGGCCTCCA,Thr-TGT,59;tRNA-Thr-TGT-3-1,GGCTCCATAGCTCAGGGGTTAGAGCACTGGTCTTGTAAACCAGGGGTCGCGAGTTCAAATCTCGCTGGGGCCTCCA,Thr-TGT,59	-0.449158	0.73247	0.382634	0.757069	9.60094	10.0501	518.617	1013.65	1280.44	386.675	1370.03	1312.33
tRF-1:31-Lys-CTT-2	GCCCGGCTAGCTCAGTCGGTAGAGCATGGGA	tRF-5c	-	-	31	tRNA-Lys-CTT-2-1,GCCCGGCTAGCTCAGTCGGTAGAGCATGGGACTCTTAATCCCAGGGTCGTGGGTTCGAGCCCCACGTTGGGCGCCA,Lys-CTT,0	-0.453997	0.730017	0.536073	0.863327	6.00357	6.45757	112.743	40.0125	65.6638	57.5296	38.9581	115.116
tRF-60:76-Tyr-GTA-1-M5	TCCGGCTCGAAGGACCA	tRF-3a	3046a	-	17	tRNA-Tyr-GTA-1-1,CCTTCGATAGCTCAGTTGGTAGAGCGGAGGACTGTAGATCCTTAGGTCGCTGGTTCGAATCCGGCTCGAAGGACCA,Tyr-GTA,59;tRNA-Tyr-GTA-2-1,CCTTCGATAGCTCAGTTGGTAGAGCGGAGGACTGTAGATCCTTAGGTCGCTGGTTCGATTCCGGCTCGAAGGACCA,Tyr-GTA,59;tRNA-Tyr-GTA-3-1,CCTTCGATAGCTCAGCTGGTAGAGCGGAGGACTGTAGATCCTTAGGTCGCTGGTTCGATTCCGGCTCGAAGGACCA,Tyr-GTA,59;tRNA-Tyr-GTA-4-1,CCTTCGATAGCTCAGCTGGTAGAGCGGAGGACTGTAGATCCTTAGGTCGCTGGTTCGACTCCGGCTC…	-0.45686	0.72857	0.356929	0.737832	9.70743	10.1643	665.182	1133.69	1220.25	450.806	1350.55	1473.49
tRF-56:74-Gly-CCC-2-M5	ATTCCCGGCCAATGCACCA	tRF-3b	-	-	19	tRNA-Gly-CCC-2-1,GCATTGGTAGTTCAATGGTAGAATTCTCGCCTCCCACGCGGGTGACCCGGGTTCGATTCCCGGCCAATGCACCA,Gly-CCC,55;tRNA-Gly-CCC-3-1,GCATTGGTGGTTCAATGGTAGAATTCTCGCCTCCCACGCGGGTGACCCGGGTTCGATTCCCGGCCAATGCACCA,Gly-CCC,55;tRNA-Gly-CCC-4-1,GCATTGGTGGTTCAATGGTAGAATTCTCGCCTCCCACTCGGGTGACCCGGGTTCGATTCCCGGCCAATGCACCA,Gly-CCC,55;tRNA-Gly-GCC-2-1,GCATTGGTGGTTCAGTGGTAGAATTCTCGCCTGCCACGCGGGAGGCCCGGGTTCGATTCCCGGCCAATGCACC…	-0.467109	0.723413	0.694443	0.936062	3.58308	4.05019	0	33.3438	10.944	0.943109	32.4651	23.0233
tRF-59:76-Thr-TGT-2-M2	ATCTCGCTGGGGCCTCCA	tRF-3a	3005a	-	18	tRNA-Thr-TGT-2-1,GGCCCTATAGCTCAGGGGTTAGAGCACTGGTCTTGTAAACCAGGGGTCGCGAGTTCAAATCTCGCTGGGGCCTCCA,Thr-TGT,58;tRNA-Thr-TGT-3-1,GGCTCCATAGCTCAGGGGTTAGAGCACTGGTCTTGTAAACCAGGGGTCGCGAGTTCAAATCTCGCTGGGGCCTCCA,Thr-TGT,58	-0.468863	0.722534	0.395702	0.75938	7.26457	7.73344	124.017	173.388	251.711	71.6763	240.242	322.326
tRF-1:22-Gly-GCC-2-M3	GCATTGGTGGTTCAGTGGTAGA	tRF-5b	5004a	-	22	tRNA-Gly-GCC-2-1,GCATTGGTGGTTCAGTGGTAGAATTCTCGCCTGCCACGCGGGAGGCCCGGGTTCGATTCCCGGCCAATGCACCA,Gly-GCC,0;tRNA-Gly-GCC-3-1,GCATTGGTGGTTCAGTGGTAGAATTCTCGCCTGCCACGCGGGAGGCCCGGGTTTGATTCCCGGCCAATGCACCA,Gly-GCC,0;tRNA-Gly-GCC-4-1,GCATTGGTGGTTCAGTGGTAGAATTCTCGCCTGCCACGCGGGAGGCCCGGGTTCGGTTCCCGGCCAATGCACCA,Gly-GCC,0	-0.472498	0.720716	0.480808	0.848305	6.13652	6.60902	22.5485	126.706	109.44	26.407	123.367	153.488
tRF-57:74-Gly-GCC-1	TTCCCGGCCCATGCACCA	tRF-3a	3043a	-	18	tRNA-Gly-GCC-1-1,GCATGGGTGGTTCAGTGGTAGAATTCTCGCCTGCCACGCGGGAGGCCCGGGTTCGATTCCCGGCCCATGCACCA,Gly-GCC,56	-0.474005	0.719963	0.494162	0.857555	5.57094	6.04495	16.9114	73.3563	82.0798	15.0897	100.642	92.093
tRF-1:29-His-GTG-2	GCCGTGATCGTATAGTGGTTAGTACTCTG	tRF-5c	-	-	29	tRNA-His-GTG-2-1,GCCGTGATCGTATAGTGGTTAGTACTCTGCGTTGTGGCCGCAGCAACCTCGGTTCGAATCCGAGTCACGGCACCA,His-GTG,0	-0.487345	0.713337	0.563905	0.884911	9.71277	10.2001	1860.26	560.176	399.455	1094.01	473.991	690.698
tRF-1:30-Asp-GTC-1-M2	TCCTCGTTAGTATAGTGGTGAGTATCCCCG	tRF-5c	-	-	30	tRNA-Asp-GTC-1-1,TCCTCGTTAGTATAGTGGTGAGTATCCCCGCCTGTCACGCGGGAGACCGGGGTTCGATTCCCCGACGGGGAGCCA,Asp-GTC,0;tRNA-Asp-GTC-4-1,TCCTCGTTAGTATAGTGGTGAGTATCCCCGCCTGTCACACAGGAGACCGGGGTTCGATTCCCCGATGGGGAGCCA,Asp-GTC,0	-0.49253	0.710777	0.496861	0.857555	6.80328	7.29581	197.3	86.6938	98.4958	134.865	84.4093	92.093
tRF-1:14-Gly-ACC-1-M8	GTTTCCGTAGTGTA	tRF-5a	-	-	14	tRNA-Gly-ACC-1-1,GTTTCCGTAGTGTAGTGGTTAGCGCGTTCGCCTACCAAAGCGAAAGGTCCCCGGTTCGAAACCGGGCGGAAACACCA,Gly-ACC,0;tRNA-Val-AAC-1-1,GTTTCCGTAGTGTAGTGGTTATCACGTTCGCCTAACACGCGAAAGGTCCCCGGTTCGAAACCGGGCGGAAACACCA,Val-AAC,0;tRNA-Val-AAC-2-1,GTTTCCGTAGTGTAGTGGTCATCACGCTCGCCTAACACGCGAGAGGTCCCCGGTTCGAAACCGGGCGGAAACACCA,Val-AAC,0;tRNA-Val-AAC-3-1,GTTTCCGTAGTGTAGTGGTCATCACGCTCGCCTAACACGCGAGAGGTCCCCGGTTCGAAACCGGGCGGG…	-0.512404	0.701053	0.3959	0.75938	6.85464	7.36704	101.468	166.719	147.744	100.913	191.544	99.7675
tRF-1:29-Glu-CTC-2	TCCCTGGTGGTCTAGTGGTTAGGATTTGG	tRF-5c	-	-	29	tRNA-Glu-CTC-2-1,TCCCTGGTGGTCTAGTGGTTAGGATTTGGCGCTCTCACCGCCGCGGCCTGGGTTCGATTCCCGGTCAGGGAACCA,Glu-CTC,0	-0.512455	0.701029	0.568009	0.88594	5.54883	6.06128	67.6456	26.675	65.6638	62.2452	25.9721	30.6977
tRF-1:15-Leu-CAA-1-M8	GTCAGGATGGCCGAG	tRF-5a	-	-	15	tRNA-Leu-CAA-1-1,GTCAGGATGGCCGAGTGGTCTAAGGCGCCAGACTCAAGTTCTGGTCTCCCCTGGAGGCGTGGGTTCGAATCCCACTTCTGACACCA,Leu-CAA,0;tRNA-Leu-CAA-2-1,GTCAGGATGGCCGAGTGGTCTAAGGCGCCAGACTCAAGTTCTGGTCTCCGTATGGAGGCGTGGGTTCGAATCCCACTTCTGACACCA,Leu-CAA,0;tRNA-Leu-CAA-3-1,GTCAGGATGGCCGAGTGGTCTAAGGCGCCAGACTCAAGTTCTGGTCTCCGAATGGAGGCGTGGGTTCGAATCCCACTTCTGACACCA,Leu-CAA,0;tRNA-Leu-CAA-4-1,GTCAGGATGGCCGAGTGGTCTAAGGCGCCAGACTCAAG…	-0.516414	0.699107	0.3281	0.712231	6.83837	7.35479	118.38	146.713	142.272	58.4727	185.051	237.907
tRF-1:30-Glu-TTC-2	TCCCATATGGTCTAGCGGTTAGGATTCCTG	tRF-5c	-	-	30	tRNA-Glu-TTC-2-1,TCCCATATGGTCTAGCGGTTAGGATTCCTGGTTTTCACCCAGGCGGCCCGGGTTCGACTCCCGGTATGGGAACCA,Glu-TTC,0	-0.522102	0.696356	0.389955	0.75938	7.69065	8.21275	248.034	186.725	290.015	219.744	220.763	214.884
tRF-1:31-Lys-TTT-1	GCCCGGATAGCTCAGTCGGTAGAGCATCAGA	tRF-5c	5005b	-	31	tRNA-Lys-TTT-1-1,GCCCGGATAGCTCAGTCGGTAGAGCATCAGACTTTTAATCTGAGGGTCCAGGGTTCAAGTCCCTGTTCGGGCGCCA,Lys-TTT,0	-0.535483	0.689927	0.353721	0.733937	8.28526	8.82075	383.325	260.081	448.703	316.885	379.842	337.674
tRF-1:29-Gln-TTG-3	GGCCCCATGGTGTAATGGTTAGCACTCTG	tRF-5c	-	-	29	tRNA-Gln-TTG-3-1,GGCCCCATGGTGTAATGGTTAGCACTCTGGACTTTGAATCCAGCGATCCGAGTTCAAATCTCGGTGGGACCTCCA,Gln-TTG,0	-0.539566	0.687978	0.579693	0.890898	3.37376	3.91332	11.2743	6.66876	16.416	7.54487	9.73953	23.0233
tRF-1:29-Gly-GCC-2-M3	GCATTGGTGGTTCAGTGGTAGAATTCTCG	tRF-5c	-	-	29	tRNA-Gly-GCC-2-1,GCATTGGTGGTTCAGTGGTAGAATTCTCGCCTGCCACGCGGGAGGCCCGGGTTCGATTCCCGGCCAATGCACCA,Gly-GCC,0;tRNA-Gly-GCC-3-1,GCATTGGTGGTTCAGTGGTAGAATTCTCGCCTGCCACGCGGGAGGCCCGGGTTTGATTCCCGGCCAATGCACCA,Gly-GCC,0;tRNA-Gly-GCC-4-1,GCATTGGTGGTTCAGTGGTAGAATTCTCGCCTGCCACGCGGGAGGCCCGGGTTCGGTTCCCGGCCAATGCACCA,Gly-GCC,0	-0.541522	0.687046	0.46154	0.827487	14.5193	15.0608	41320.2	14124.4	24733.4	32133.6	19209.6	13353.5
tRF-58:75-Gln-CTG-1-M7	ATCTCGGTGGGACCTCCA	tRF-3a	3007a	-	18	tRNA-Gln-CTG-1-1,GGTTCCATGGTGTAATGGTTAGCACTCTGGACTCTGAATCCAGCGACCCGAGTTCAAATCTCGGTGGGACCTCCA,Gln-CTG,57;tRNA-Gln-CTG-3-1,GGTTCCATGGTGTAATGGTTAGCACTCTGGACTCTGAATCCAGCGATCCGAGTTCAAATCTCGGTGGGACCTCCA,Gln-CTG,57;tRNA-Gln-CTG-4-1,GGTTCCATGGTGTAATGGTGAGCACTCTGGACTCTGAATCCAGCGATCCGAGTTCAAATCTCGGTGGGACCTCCA,Gln-CTG,57;tRNA-Gln-TTG-1-1,GGTCCCATGGTGTAATGGTTAGCACTCTGGACTTTGAATCCAGCGATCCGAGTTCAAATCTCGGTGGGAC…	-0.546845	0.684516	0.287207	0.687555	9.94356	10.4904	755.376	1320.41	1482.91	686.583	1899.21	1266.28
tRF-1:23-Cys-GCA-1-M3	GGGGGTATAGCTCAGTGGTAGAG	tRF-5b	-	-	23	tRNA-Cys-GCA-1-1,GGGGGTATAGCTCAGTGGTAGAGCATTTGACTGCAGATCAAGAGGTCCCTGGTTCAAATCCAGGTGCCCCCTCCA,Cys-GCA,0;tRNA-Cys-GCA-2-1,GGGGGTATAGCTCAGTGGTAGAGCATTTGACTGCAGATCAAGAGGTCCCTGGTTCAAATCCGGGTGCCCCCTCCA,Cys-GCA,0;tRNA-Cys-GCA-3-1,GGGGGTATAGCTCAGTGGTAGAGCATTTGACTGCAGATCAAGAGGTCCCCGGTTCAAATCCGGGTGCCCCCTCCA,Cys-GCA,0	-0.549906	0.683065	0.534427	0.863327	4.63091	5.18081	5.63714	33.3438	49.2479	21.6915	32.4651	30.6977
tRF-55:75-Ala-AGC-2	CAATCCCCGGCACCTCCACCA	tRF-3b	-	-	21	tRNA-Ala-AGC-2-1,GGGGGTGTAGCTCAGTGGTAGAGCGCGTGCTTAGCATGCACGAGGCCCCGGGTTCAATCCCCGGCACCTCCACCA,Ala-AGC,54	-0.550649	0.682713	0.840415	1	2.8095	3.36015	0	13.3375	10.944	2.82933	22.7256	0
tRF-1:15-Ser-GCT-1-M4	GACGAGGTGGCCGAG	tRF-5a	-	-	15	tRNA-Ser-GCT-1-1,GACGAGGTGGCCGAGTGGTTAAGGCGATGGACTGCTAATCCATTGTGCTCTGCACGCGTGGGTTCGAATCCCACCTTCGTCGCCA,Ser-GCT,0;tRNA-Ser-GCT-2-1,GACGAGGTGGCCGAGTGGTTAAGGCGATGGACTGCTAATCCATTGTGCTCTGCACGCATGGGTTCGAATCCCATCCTCGTCGCCA,Ser-GCT,0;tRNA-Ser-GCT-3-1,GACGAGGTGGCCGAGTGGTTAAGGCGATGGACTGCTAATCCATTGTGCTTTGCACGCGTGGGTTCGAATCCCATCCTCGTCGCCA,Ser-GCT,0;tRNA-Ser-GCT-4-1,GACGAGGTGGCCGAGTGGTTAAGGCGATGGACTGCTAATCCAT…	-0.560032	0.678287	0.342905	0.721209	6.3029	6.86293	56.3714	106.7	120.384	32.0657	120.121	214.884
tRF-60:76-Ala-AGC-4	GCCCGCATCCTCCACCA	tRF-3a	-	-	17	tRNA-Ala-AGC-4-1,GGGGGATTAGCTCAAATGGTAGAGCGCTCGCTTAGCATGCGAGAGGTAGCGGGATCGATGCCCGCATCCTCCACCA,Ala-AGC,59	-0.564323	0.676273	0.434013	0.806856	5.69445	6.25877	28.1857	120.038	43.7759	33.0088	110.381	61.3954
tRF-1:23-Glu-CTC-1-M3	TCCCTGGTGGTCTAGTGGTTAGG	tRF-5b	5022b	-	23	tRNA-Glu-CTC-1-1,TCCCTGGTGGTCTAGTGGTTAGGATTCGGCGCTCTCACCGCCGCGGCCCGGGTTCGATTCCCGGTCAGGGAACCA,Glu-CTC,0;tRNA-Glu-CTC-2-1,TCCCTGGTGGTCTAGTGGTTAGGATTTGGCGCTCTCACCGCCGCGGCCTGGGTTCGATTCCCGGTCAGGGAACCA,Glu-CTC,0;tRNA-Glu-CTC-5-1,TCCCTGGTGGTCTAGTGGTTAGGCTTTGGTGCTCTCACCTCCATGGCCCAGGTTTGATTCCTGGTCAGGGAACCA,Glu-CTC,0	-0.564818	0.676041	1	1	1.9109	2.47572	0	6.66876	5.47199	0.943109	12.986	0
tRF-59:75-Gln-CTG-2	TCTCGGTGGAACCTCCA	tRF-3a	3006a	-	17	tRNA-Gln-CTG-2-1,GGTTCCATGGTGTAATGGTTAGCACTCTGGACTCTGAATCCAGCGATCCGAGTTCAAATCTCGGTGGAACCTCCA,Gln-CTG,58	-0.568032	0.674536	0.2471	0.673844	9.55224	10.1203	631.359	1147.03	941.182	469.668	1350.55	1289.3
tRF-58:74-Gly-CCC-2-M6	TCCCGGCCAATGCACCA	tRF-3a	-	-	17	tRNA-Gly-CCC-2-1,GCATTGGTAGTTCAATGGTAGAATTCTCGCCTCCCACGCGGGTGACCCGGGTTCGATTCCCGGCCAATGCACCA,Gly-CCC,57;tRNA-Gly-CCC-3-1,GCATTGGTGGTTCAATGGTAGAATTCTCGCCTCCCACGCGGGTGACCCGGGTTCGATTCCCGGCCAATGCACCA,Gly-CCC,57;tRNA-Gly-CCC-4-1,GCATTGGTGGTTCAATGGTAGAATTCTCGCCTCCCACTCGGGTGACCCGGGTTCGATTCCCGGCCAATGCACCA,Gly-CCC,57;tRNA-Gly-GCC-2-1,GCATTGGTGGTTCAGTGGTAGAATTCTCGCCTGCCACGCGGGAGGCCCGGGTTCGATTCCCGGCCAATGCACC…	-0.569319	0.673935	0.353197	0.733937	6.38863	6.95795	78.9199	160.05	65.6638	40.5537	198.037	122.791
tRF-1:23-Ser-AGA-1-M3	GTAGTCGTGGCCGAGTGGTTAAG	tRF-5b	-	-	23	tRNA-Ser-AGA-1-1,GTAGTCGTGGCCGAGTGGTTAAGGCGATGGACTAGAAATCCATTGGGGTTTCCCCGCGCAGGTTCGAATCCTGCCGACTACGCCA,Ser-AGA,0;tRNA-Ser-AGA-2-1,GTAGTCGTGGCCGAGTGGTTAAGGCGATGGACTAGAAATCCATTGGGGTCTCCCCGCGCAGGTTCGAATCCTGCCGACTACGCCA,Ser-AGA,0;tRNA-Ser-TGA-2-1,GTAGTCGTGGCCGAGTGGTTAAGGCGATGGACTTGAAATCCATTGGGGTTTCCCCGCGCAGGTTCGAATCCTGCCGACTACGCCA,Ser-TGA,0	-0.572701	0.672357	0.52102	0.863327	4.09743	4.67013	16.9114	33.3438	10.944	13.2035	16.2326	38.3721
tRF-61:77-Asn-GTT-2-M2	CCCACCCAGGGACGCCA	tRF-3a	-	-	17	tRNA-Asn-GTT-2-1,GTCTCTGTGGCGCAATTGGTTAGCGCGTTCGGCTGTTAACCGAAAGGTTGGTGGTTCAAGCCCACCCAGGGACGCCA,Asn-GTT,60;tRNA-Asn-GTT-3-1,GTCTCTGTGGCGCAATCGGTTAGCGCGTTCGGCTGTTAACCGAAAGGTTGGTGGTTCGAGCCCACCCAGGGACGCCA,Asn-GTT,60	-0.575407	0.671097	0.506855	0.861343	4.53866	5.11407	16.9114	13.3375	49.2479	16.976	45.4512	23.0233
tRF-59:75-Ala-AGC-1	CCCCAGCACCTCCACCA	tRF-3a	-	-	17	tRNA-Ala-AGC-1-1,GGGGGTGTAGCTCAGTGGTAGAGCGCGTGCTTAGCATGCACGAGGCCCTGGGTTCGATCCCCAGCACCTCCACCA,Ala-AGC,58	-0.577079	0.67032	0.602456	0.909429	3.79106	4.36814	22.5485	13.3375	10.944	7.54487	6.49302	53.7209
tRF-1:32-Lys-CTT-3	GCCCGGCTAGCTCAGTCGGTAGAGCATGAGAC	tRF-5c	-	-	32	tRNA-Lys-CTT-3-1,GCCCGGCTAGCTCAGTCGGTAGAGCATGAGACTCTTAATCTCAGGGTCGTGGGTTCGAGCCCCACGTTGGGCGCCA,Lys-CTT,0	-0.583458	0.667362	0.252266	0.673844	11.0587	11.6422	1905.35	3467.75	2363.9	1565.56	3304.95	3714.42
tRF-1:31-Glu-CTC-1	TCCCTGGTGGTCTAGTGGTTAGGATTCGGCG	tRF-5c	-	-	31	tRNA-Glu-CTC-1-1,TCCCTGGTGGTCTAGTGGTTAGGATTCGGCGCTCTCACCGCCGCGGCCCGGGTTCGATTCCCGGTCAGGGAACCA,Glu-CTC,0	-0.586123	0.66613	0.398897	0.762031	14.3315	14.9176	31934.4	14584.6	24656.8	28152.7	17131.8	15080.2
tRF-58:74-Gly-GCC-1	TCCCGGCCCATGCACCA	tRF-3a	-	-	17	tRNA-Gly-GCC-1-1,GCATGGGTGGTTCAGTGGTAGAATTCTCGCCTGCCACGCGGGAGGCCCGGGTTCGATTCCCGGCCCATGCACCA,Gly-GCC,57	-0.599991	0.659758	0.440597	0.816357	4.97174	5.57173	16.9114	33.3438	60.1918	17.9191	68.1767	46.0465
tRF-53:74-Gly-CCC-1	TCGATTCCCGGGCGGCGCACCA	tRF-3b	3044b	-	22	tRNA-Gly-CCC-1-1,GCGCCGCTGGTGTAGTGGTATCATGCAAGATTCCCATTCTTGCGACCCGGGTTCGATTCCCGGGCGGCGCACCA,Gly-CCC,52	-0.601774	0.658943	0.384444	0.757295	5.25214	5.85392	33.8228	33.3438	65.6638	18.8622	64.9302	92.093
tRF-29:42-Asn-GTT-1-M3	TCGGCTGTTAACCG	tRF-2	-	-	14	tRNA-Asn-GTT-1-1,GTCTCCGTGGCGCAATCGGTCAGCGCGTTCGGCTGTTAACCGAAAGGTTGGTGGTTCGAGCCCACCCGGGGACGCCA,Asn-GTT,28;tRNA-Asn-GTT-2-1,GTCTCTGTGGCGCAATTGGTTAGCGCGTTCGGCTGTTAACCGAAAGGTTGGTGGTTCAAGCCCACCCAGGGACGCCA,Asn-GTT,28;tRNA-Asn-GTT-3-1,GTCTCTGTGGCGCAATCGGTTAGCGCGTTCGGCTGTTAACCGAAAGGTTGGTGGTTCGAGCCCACCCAGGGACGCCA,Asn-GTT,28	-0.602564	0.658582	0.654126	0.919427	3.39989	4.00245	11.2743	26.675	0	2.82933	25.9721	23.0233
tRF-69:86-Leu-CAG-1-M3	ATCCCACTCCTGACACCA	tRF-3a	3017a	-	18	tRNA-Leu-CAG-1-1,GTCAGGATGGCCGAGCGGTCTAAGGCGCTGCGTTCAGGTCGCAGTCTCCCCTGGAGGCGTGGGTTCGAATCCCACTCCTGACACCA,Leu-CAG,68;tRNA-Leu-CAG-3-1,GTCAGGATGGCCGAGTGGTCTAAGGAGCTGTGTTCAGGTCGCAGTCTCCCCTGGAGGCGTGGGTTCGAATCCCACTCCTGACACCA,Leu-CAG,68;tRNA-Leu-CAG-4-1,GTCAGGATGGCCGAGCAGTCTAAGGCACTGCGTTCAGGTCGCAGTCTCCCCTGGAGGCGTGGATTCGAATCCCACTCCTGACACCA,Leu-CAG,68	-0.615729	0.6526	0.253097	0.673844	8.32507	8.94079	180.388	560.176	437.759	188.622	659.042	552.558
tRF-1:16-Lys-TTT-1	GCCCGGATAGCTCAGT	tRF-5a	-	-	16	tRNA-Lys-TTT-1-1,GCCCGGATAGCTCAGTCGGTAGAGCATCAGACTTTTAATCTGAGGGTCCAGGGTTCAAGTCCCTGTTCGGGCGCCA,Lys-TTT,0	-0.631001	0.645728	0.286364	0.687555	5.8178	6.4488	39.46	93.3626	71.1358	31.1226	90.9023	138.14
tRF-57:74-Gly-CCC-1	TTCCCGGGCGGCGCACCA	tRF-3a	3044a	-	18	tRNA-Gly-CCC-1-1,GCGCCGCTGGTGTAGTGGTATCATGCAAGATTCCCATTCTTGCGACCCGGGTTCGATTCCCGGGCGGCGCACCA,Gly-CCC,56	-0.64119	0.641184	0.419546	0.787893	4.36327	5.00446	39.46	13.3375	16.416	10.3742	29.2186	61.3954
tRF-1:16-Cys-GCA-10-M11	GGGGGTATAGCTCAGG	tRF-5a	-	-	16	tRNA-Cys-GCA-10-1,GGGGGTATAGCTCAGGGGTAGAGCATTTGACTGCAGATCAAGAGGTCCCTGGTTCAAATCCAGATGCCCCCTCCA,Cys-GCA,0;tRNA-Cys-GCA-11-1,GGGGGTATAGCTCAGGGGTAGAGTATTTGGCTGCAGATCAAGAGGTCCCTGGTTCAAATCCAGGTGCCCCCTCCA,Cys-GCA,0;tRNA-Cys-GCA-12-1,GGGGGTATAGCTCAGGGGTAGAGCATTTGACTGCAGATCAAGAGGTCCTTGGTTCAAATCCAGGTGTCCCCTCCA,Cys-GCA,0;tRNA-Cys-GCA-14-1,GGGGGTATAGCTCAGGGGTAGAGCATTTGACTGCAGATCAAGAGGTCCCTAGTTCAAATCCAGGTGCCC…	-0.662252	0.631891	0.315742	0.700537	5.77488	6.43713	50.7342	66.6876	76.6078	37.7244	136.353	53.7209
tRF-1:29-Asp-GTC-3	TCCTCGTTAGTATAGTGGTGAGTATCCCT	tRF-5c	-	-	29	tRNA-Asp-GTC-3-1,TCCTCGTTAGTATAGTGGTGAGTATCCCTGCCTGTCACGCAGGACACCAGGGTTCGATTTCCTGACGGGGAGCCA,Asp-GTC,0	-0.665281	0.630566	0.376452	0.755718	5.46983	6.13511	73.2828	53.35	27.3599	56.5865	38.9581	46.0465
tRF-70:86-Leu-CAG-1-M3	TCCCACTCCTGACACCA	tRF-3a	-	-	17	tRNA-Leu-CAG-1-1,GTCAGGATGGCCGAGCGGTCTAAGGCGCTGCGTTCAGGTCGCAGTCTCCCCTGGAGGCGTGGGTTCGAATCCCACTCCTGACACCA,Leu-CAG,69;tRNA-Leu-CAG-3-1,GTCAGGATGGCCGAGTGGTCTAAGGAGCTGTGTTCAGGTCGCAGTCTCCCCTGGAGGCGTGGGTTCGAATCCCACTCCTGACACCA,Leu-CAG,69;tRNA-Leu-CAG-4-1,GTCAGGATGGCCGAGCAGTCTAAGGCACTGCGTTCAGGTCGCAGTCTCCCCTGGAGGCGTGGATTCGAATCCCACTCCTGACACCA,Leu-CAG,69	-0.665343	0.630539	0.341659	0.721209	5.56659	6.23193	22.5485	53.35	93.0238	26.407	129.86	53.7209
tRF-1:30-Cys-GCA-1-M3	GGGGGTATAGCTCAGTGGTAGAGCATTTGA	tRF-5c	-	-	30	tRNA-Cys-GCA-1-1,GGGGGTATAGCTCAGTGGTAGAGCATTTGACTGCAGATCAAGAGGTCCCTGGTTCAAATCCAGGTGCCCCCTCCA,Cys-GCA,0;tRNA-Cys-GCA-2-1,GGGGGTATAGCTCAGTGGTAGAGCATTTGACTGCAGATCAAGAGGTCCCTGGTTCAAATCCGGGTGCCCCCTCCA,Cys-GCA,0;tRNA-Cys-GCA-3-1,GGGGGTATAGCTCAGTGGTAGAGCATTTGACTGCAGATCAAGAGGTCCCCGGTTCAAATCCGGGTGCCCCCTCCA,Cys-GCA,0	-0.667592	0.629557	0.252372	0.673844	7.98709	8.65468	270.583	193.394	426.815	274.445	285.693	383.721
tRF-64:85-Ser-CGA-2	TCGAATCCTGTTCGTGACGCCA	tRF-3b	3027b	-	22	tRNA-Ser-CGA-2-1,GTCACGGTGGCCGAGTGGTTAAGGCGTTGGACTCGAAATCCAATGGGGTTTCCCCGCACAGGTTCGAATCCTGTTCGTGACGCCA,Ser-CGA,63	-0.668353	0.629225	0.569304	0.88594	3.14626	3.81461	11.2743	20.0063	0	4.71554	19.4791	15.3488
tRF-60:76-Val-AAC-4-M3	ACCGGGCAGAAACACCA	tRF-3a	-	-	17	tRNA-Val-AAC-4-1,GTTTCTGTAGTGTAGTGGTTATCACGCTCGCCTAACACGCGAGAGGTCCCCGGTTCGAAACCGGGCAGAAACACCA,Val-AAC,59;tRNA-Val-CAC-4-1,GTTTCTGTAGTGTAGTGGTTATCACGTTCGCCTCACACGCGAAAGGTCCCCGGTTCGAAACCGGGCAGAAACACCA,Val-CAC,59;tRNA-Val-CAC-7-1,GTTTCTGTAGTGTAGTGGTTTCACATTTGCCTCACATGCAAAAGGTCCCCGGTTCTCAACCGGGCAGAAACACCA,Val-CAC,58	-0.678155	0.624964	1	1	1.09528	1.77344	0	6.66876	0	1.88622	3.24651	0
tRF-69:86-Leu-TAA-1	ACCCCACTTCTGGTACCA	tRF-3a	-	-	18	tRNA-Leu-TAA-1-1,ACCAGAATGGCCGAGTGGTTAAGGCGTTGGACTTAAGATCCAATGGATTTATATCCGCGTGGGTTCGAACCCCACTTCTGGTACCA,Leu-TAA,68	-0.687021	0.621135	0.660918	0.919427	2.82042	3.50744	5.63714	6.66876	10.944	1.88622	19.4791	15.3488
tRF-55:76-Tyr-GTA-1	TCGAATCCGGCTCGAAGGACCA	tRF-3b	3024b	-	22	tRNA-Tyr-GTA-1-1,CCTTCGATAGCTCAGTTGGTAGAGCGGAGGACTGTAGATCCTTAGGTCGCTGGTTCGAATCCGGCTCGAAGGACCA,Tyr-GTA,54	-0.688606	0.620453	0.402953	0.764507	4.45379	5.14239	16.9114	33.3438	27.3599	12.2604	55.1907	30.6977
tRF-1:31-His-GTG-2	GCCGTGATCGTATAGTGGTTAGTACTCTGCG	tRF-5c	-	-	31	tRNA-His-GTG-2-1,GCCGTGATCGTATAGTGGTTAGTACTCTGCGTTGTGGCCGCAGCAACCTCGGTTCGAATCCGAGTCACGGCACCA,His-GTG,0	-0.696395	0.617112	0.32888	0.712231	14.2447	14.941	34161.1	19646.2	13247.7	28942.1	12395.2	19876.7
tRF-1:24-Lys-TTT-1	GCCCGGATAGCTCAGTCGGTAGAG	tRF-5b	-	-	24	tRNA-Lys-TTT-1-1,GCCCGGATAGCTCAGTCGGTAGAGCATCAGACTTTTAATCTGAGGGTCCAGGGTTCAAGTCCCTGTTCGGGCGCCA,Lys-TTT,0	-0.700611	0.615311	0.332236	0.713407	5.37193	6.07254	33.8228	46.6813	65.6638	42.4399	77.9163	30.6977
tRF-58:75-Cys-GCA-1-M12	ATCCAGGTGCCCCCTCCA	tRF-3a	-	-	18	tRNA-Cys-GCA-1-1,GGGGGTATAGCTCAGTGGTAGAGCATTTGACTGCAGATCAAGAGGTCCCTGGTTCAAATCCAGGTGCCCCCTCCA,Cys-GCA,57;tRNA-Cys-GCA-11-1,GGGGGTATAGCTCAGGGGTAGAGTATTTGGCTGCAGATCAAGAGGTCCCTGGTTCAAATCCAGGTGCCCCCTCCA,Cys-GCA,57;tRNA-Cys-GCA-13-1,GGGGGTATAGCTCAGAGGTAGAGCATTTGACTGCAGATCAAGAGATCTCTGGTTCAAATCCAGGTGCCCCCTCCA,Cys-GCA,57;tRNA-Cys-GCA-14-1,GGGGGTATAGCTCAGGGGTAGAGCATTTGACTGCAGATCAAGAGGTCCCTAGTTCAAATCCAGGTGC…	-0.70591	0.613056	0.190827	0.644155	8.01124	8.71715	169.114	446.807	328.319	141.466	412.307	706.047
tRF-60:76-Ala-AGC-6-M2	GCCCGCATTCTCCACCA	tRF-3a	-	-	17	tRNA-Ala-AGC-6-1,GGGGAATTAGCTCAAATGGTAGAGCGCTCGCTTAGCATGCGAGAGGTAGCGGGATCGATGCCCGCATTCTCCACCA,Ala-AGC,59;tRNA-Ala-AGC-7-1,GGGGAATTAGCTCAAATGGTAGAGCGCTCGCTTAGCATGTGAGAGGTAGCGGGATCGATGCCCGCATTCTCCACCA,Ala-AGC,59	-0.705949	0.613039	0.337167	0.72	4.54557	5.25152	16.9114	20.0063	43.7759	17.9191	32.4651	53.7209
tRF-1:31-His-GTG-1	GCCGAGATCGTATAGTGGTTAGTACTCTGCA	tRF-5c	-	-	31	tRNA-His-GTG-1-1,GCCGAGATCGTATAGTGGTTAGTACTCTGCATTGTGGCTGCAGCAACCTCGGTTCGAATCCGAGTCTCGGCACCA,His-GTG,0	-0.707148	0.61253	0.302066	0.688661	11.1704	11.8775	3923.45	2367.41	1690.84	3298.99	1499.89	2816.51
tRF-56:75-Gln-CTG-2	AAATCTCGGTGGAACCTCCA	tRF-3b	-	-	20	tRNA-Gln-CTG-2-1,GGTTCCATGGTGTAATGGTTAGCACTCTGGACTCTGAATCCAGCGATCCGAGTTCAAATCTCGGTGGAACCTCCA,Gln-CTG,55	-0.710703	0.611022	0.600884	0.909429	3.82737	4.53807	28.1857	20.0063	0	20.7484	0	23.0233
tRF-1:31-Lys-CTT-3	GCCCGGCTAGCTCAGTCGGTAGAGCATGAGA	tRF-5c	-	-	31	tRNA-Lys-CTT-3-1,GCCCGGCTAGCTCAGTCGGTAGAGCATGAGACTCTTAATCTCAGGGTCGTGGGTTCGAGCCCCACGTTGGGCGCCA,Lys-CTT,0	-0.71692	0.608395	0.255205	0.673844	12.7791	13.4961	9836.8	6722.11	8016.46	9591.42	6570.94	8058.14
tRF-1:16-Cys-GCA-13-M2	GGGGGTATAGCTCAGA	tRF-5a	-	-	16	tRNA-Cys-GCA-13-1,GGGGGTATAGCTCAGAGGTAGAGCATTTGACTGCAGATCAAGAGATCTCTGGTTCAAATCCAGGTGCCCCCTCCA,Cys-GCA,0;tRNA-Cys-GCA-18-1,GGGGGTATAGCTCAGAGGAAGAGCATTTGACTGCAGATCAAGAGGTCCCTGATTCAAATCCAGGTGCCCCCTCCA,Cys-GCA,0	-0.722222	0.606163	0.565448	0.884911	3.61176	4.33398	22.5485	13.3375	5.47199	7.54487	35.7116	7.67442
tRF-1:15-Lys-TTT-3	GCCTGGATAGCTCAA	tRF-5a	-	-	15	tRNA-Lys-TTT-3-1,GCCTGGATAGCTCAATTGGTAGAGCATCAGACTTTTAATCTGAGGGTTCAGGGTTCAAGTCCCTGTTCAGGCGCCA,Lys-TTT,0	-0.723654	0.605562	0.448703	0.821217	3.91733	4.64098	5.63714	13.3375	32.8319	12.2604	32.4651	15.3488
tRF-1:14-Ser-AGA-1-M3	GTAGTCGTGGCCGA	tRF-5a	-	-	14	tRNA-Ser-AGA-1-1,GTAGTCGTGGCCGAGTGGTTAAGGCGATGGACTAGAAATCCATTGGGGTTTCCCCGCGCAGGTTCGAATCCTGCCGACTACGCCA,Ser-AGA,0;tRNA-Ser-AGA-2-1,GTAGTCGTGGCCGAGTGGTTAAGGCGATGGACTAGAAATCCATTGGGGTCTCCCCGCGCAGGTTCGAATCCTGCCGACTACGCCA,Ser-AGA,0;tRNA-Ser-TGA-2-1,GTAGTCGTGGCCGAGTGGTTAAGGCGATGGACTTGAAATCCATTGGGGTTTCCCCGCGCAGGTTCGAATCCTGCCGACTACGCCA,Ser-TGA,0	-0.727892	0.603785	0.136843	0.578983	9.03627	9.76416	434.06	800.251	667.582	392.333	941.488	1059.07
tRF-69:85-Ser-AGA-1-M3	TCCTGCCGACTACGCCA	tRF-3a	-	-	17	tRNA-Ser-AGA-1-1,GTAGTCGTGGCCGAGTGGTTAAGGCGATGGACTAGAAATCCATTGGGGTTTCCCCGCGCAGGTTCGAATCCTGCCGACTACGCCA,Ser-AGA,68;tRNA-Ser-AGA-2-1,GTAGTCGTGGCCGAGTGGTTAAGGCGATGGACTAGAAATCCATTGGGGTCTCCCCGCGCAGGTTCGAATCCTGCCGACTACGCCA,Ser-AGA,68;tRNA-Ser-TGA-2-1,GTAGTCGTGGCCGAGTGGTTAAGGCGATGGACTTGAAATCCATTGGGGTTTCCCCGCGCAGGTTCGAATCCTGCCGACTACGCCA,Ser-TGA,68	-0.728913	0.603358	0.181436	0.637981	7.21152	7.94043	112.743	226.738	196.992	99.9695	194.791	414.419
tRF-57:74-Gly-CCC-2-M6	TTCCCGGCCAATGCACCA	tRF-3a	3042a	-	18	tRNA-Gly-CCC-2-1,GCATTGGTAGTTCAATGGTAGAATTCTCGCCTCCCACGCGGGTGACCCGGGTTCGATTCCCGGCCAATGCACCA,Gly-CCC,56;tRNA-Gly-CCC-3-1,GCATTGGTGGTTCAATGGTAGAATTCTCGCCTCCCACGCGGGTGACCCGGGTTCGATTCCCGGCCAATGCACCA,Gly-CCC,56;tRNA-Gly-CCC-4-1,GCATTGGTGGTTCAATGGTAGAATTCTCGCCTCCCACTCGGGTGACCCGGGTTCGATTCCCGGCCAATGCACCA,Gly-CCC,56;tRNA-Gly-GCC-2-1,GCATTGGTGGTTCAGTGGTAGAATTCTCGCCTGCCACGCGGGAGGCCCGGGTTCGATTCCCGGCCAATGCACC…	-0.729391	0.603158	0.217455	0.656828	6.04003	6.76942	90.1942	93.3626	49.2479	51.871	123.367	115.116
tRF-1:31-Gly-CCC-3-M2	GCATTGGTGGTTCAATGGTAGAATTCTCGCC	tRF-5c	-	-	31	tRNA-Gly-CCC-3-1,GCATTGGTGGTTCAATGGTAGAATTCTCGCCTCCCACGCGGGTGACCCGGGTTCGATTCCCGGCCAATGCACCA,Gly-CCC,0;tRNA-Gly-CCC-4-1,GCATTGGTGGTTCAATGGTAGAATTCTCGCCTCCCACTCGGGTGACCCGGGTTCGATTCCCGGCCAATGCACCA,Gly-CCC,0	-0.739072	0.599124	0.214531	0.656828	6.169	6.90807	90.1942	86.6938	76.6078	65.0745	136.353	99.7675
tRF-1:24-Gly-GCC-1	GCATGGGTGGTTCAGTGGTAGAAT	tRF-5b	-	-	24	tRNA-Gly-GCC-1-1,GCATGGGTGGTTCAGTGGTAGAATTCTCGCCTGCCACGCGGGAGGCCCGGGTTCGATTCCCGGCCCATGCACCA,Gly-GCC,0	-0.740631	0.598477	0.232049	0.670905	5.99527	6.73591	62.0085	120.038	49.2479	41.4968	149.339	107.442
tRF-1:16-Gly-GCC-1	GCATGGGTGGTTCAGT	tRF-5a	-	-	16	tRNA-Gly-GCC-1-1,GCATGGGTGGTTCAGTGGTAGAATTCTCGCCTGCCACGCGGGAGGCCCGGGTTCGATTCCCGGCCCATGCACCA,Gly-GCC,0	-0.750288	0.594485	0.259101	0.679172	4.74668	5.49696	28.1857	26.675	38.3039	13.2035	51.9442	76.7442
tRF-1:28-Val-AAC-5	GTTTCCGTAGTGTAGTGGTTATCACATT	tRF-5c	-	-	28	tRNA-Val-AAC-5-1,GTTTCCGTAGTGTAGTGGTTATCACATTCGCCTAACACGCGAAAGGTCCCCGGTTCGAAACCGGGCGGAAACACCA,Val-AAC,0	-0.757914	0.591351	0.316127	0.700537	4.91572	5.67364	11.2743	73.3563	27.3599	28.2933	45.4512	53.7209
tRF-1:15-Gly-CCC-3-M2	GCATTGGTGGTTCAA	tRF-5a	-	-	15	tRNA-Gly-CCC-3-1,GCATTGGTGGTTCAATGGTAGAATTCTCGCCTCCCACGCGGGTGACCCGGGTTCGATTCCCGGCCAATGCACCA,Gly-CCC,0;tRNA-Gly-CCC-4-1,GCATTGGTGGTTCAATGGTAGAATTCTCGCCTCCCACTCGGGTGACCCGGGTTCGATTCCCGGCCAATGCACCA,Gly-CCC,0	-0.761164	0.59002	0.543412	0.867613	3.80533	4.5665	28.1857	13.3375	5.47199	18.8622	16.2326	7.67442
tRF-1:32-Lys-CTT-2	GCCCGGCTAGCTCAGTCGGTAGAGCATGGGAC	tRF-5c	5006c	-	32	tRNA-Lys-CTT-2-1,GCCCGGCTAGCTCAGTCGGTAGAGCATGGGACTCTTAATCCCAGGGTCGTGGGTTCGAGCCCCACGTTGGGCGCCA,Lys-CTT,0	-0.761254	0.589983	0.379737	0.755718	3.77504	4.5363	11.2743	20.0063	16.416	11.3173	19.4791	30.6977
tRF-69:86-Leu-CAA-1-M5	ATCCCACTTCTGACACCA	tRF-3a	3018a	-	18	tRNA-Leu-CAA-1-1,GTCAGGATGGCCGAGTGGTCTAAGGCGCCAGACTCAAGTTCTGGTCTCCCCTGGAGGCGTGGGTTCGAATCCCACTTCTGACACCA,Leu-CAA,68;tRNA-Leu-CAA-2-1,GTCAGGATGGCCGAGTGGTCTAAGGCGCCAGACTCAAGTTCTGGTCTCCGTATGGAGGCGTGGGTTCGAATCCCACTTCTGACACCA,Leu-CAA,69;tRNA-Leu-CAA-3-1,GTCAGGATGGCCGAGTGGTCTAAGGCGCCAGACTCAAGTTCTGGTCTCCGAATGGAGGCGTGGGTTCGAATCCCACTTCTGACACCA,Leu-CAA,69;tRNA-Leu-CAA-4-1,GTCAGGATGGCCGAGTGGTCTAAGGCGCCAGACTC…	-0.761545	0.589864	0.135954	0.578983	10.3771	11.1386	1054.14	2093.99	1685.37	788.439	2986.79	2808.84
tRF-60:77-Thr-AGT-2-M2	ATCCCAGCGGGGCCTCCA	tRF-3a	3019a	-	18	tRNA-Thr-AGT-2-1,GGCTCCGTGGCTTAGCTGGTTAAAGCGCCTGTCTAGTAAACAGGAGATCCTGGGTTCGAATCCCAGCGGGGCCTCCA,Thr-AGT,59;tRNA-Thr-AGT-4-1,GGCTCCGTGGCTTAGCTGGTTAAAGCGCCTGTCTAGTAAACAGGAGATCCTGGGTTCAAATCCCAGCGGGGCCTCCA,Thr-AGT,59	-0.761864	0.589734	0.502955	0.859991	3.38674	4.14861	11.2743	20.0063	5.47199	6.60176	16.2326	30.6977
tRF-59:76-Tyr-GTA-2-M2	TTCCGGCTCGAAGGACCA	tRF-3a	-	-	18	tRNA-Tyr-GTA-2-1,CCTTCGATAGCTCAGTTGGTAGAGCGGAGGACTGTAGATCCTTAGGTCGCTGGTTCGATTCCGGCTCGAAGGACCA,Tyr-GTA,58;tRNA-Tyr-GTA-3-1,CCTTCGATAGCTCAGCTGGTAGAGCGGAGGACTGTAGATCCTTAGGTCGCTGGTTCGATTCCGGCTCGAAGGACCA,Tyr-GTA,58	-0.767156	0.587575	0.137619	0.578983	9.23481	10.002	603.174	1140.36	448.703	429.115	1272.63	1166.51
tRF-60:76-Val-AAC-3-M2	ACCGGGCGGGAACACCA	tRF-3a	-	-	17	tRNA-Val-AAC-3-1,GTTTCCGTAGTGTAGTGGTCATCACGCTCGCCTAACACGCGAGAGGTCCCCGGTTCGAAACCGGGCGGGAACACCA,Val-AAC,59;tRNA-Val-CAC-3-1,GTTTCCGTAGTGTAGTGGTCATCACGCTCGCCTCACACGCGAGAGGTCCCCGGTTCGAAACCGGGCGGGAACACCA,Val-CAC,59	-0.772112	0.58556	0.209381	0.65535	5.85082	6.62293	28.1857	100.031	82.0798	32.0657	136.353	122.791
tRF-1:23-Tyr-GTA-1-M2	CCTTCGATAGCTCAGTTGGTAGA	tRF-5b	-	-	23	tRNA-Tyr-GTA-1-1,CCTTCGATAGCTCAGTTGGTAGAGCGGAGGACTGTAGATCCTTAGGTCGCTGGTTCGAATCCGGCTCGAAGGACCA,Tyr-GTA,0;tRNA-Tyr-GTA-2-1,CCTTCGATAGCTCAGTTGGTAGAGCGGAGGACTGTAGATCCTTAGGTCGCTGGTTCGATTCCGGCTCGAAGGACCA,Tyr-GTA,0	-0.79387	0.576795	0.201916	0.650891	5.93659	6.73046	45.0971	93.3626	82.0798	23.5777	165.572	145.814
tRF-1:29-Glu-TTC-3	TCCCTGGTGGTCTAGTGGCTAGGATTCGG	tRF-5c	-	-	29	tRNA-Glu-TTC-3-1,TCCCTGGTGGTCTAGTGGCTAGGATTCGGCGCTTTCACCGCCGCGGCCCGGGTTCGATTCCCGGTCAGGGAACCA,Glu-TTC,0	-0.794389	0.576588	0.252242	0.673844	7.90355	8.69794	343.865	173.388	311.903	363.097	259.721	199.535
tRF-1:31-Glu-TTC-3	TCCCTGGTGGTCTAGTGGCTAGGATTCGGCG	tRF-5c	-	-	31	tRNA-Glu-TTC-3-1,TCCCTGGTGGTCTAGTGGCTAGGATTCGGCGCTTTCACCGCCGCGGCCCGGGTTCGATTCCCGGTCAGGGAACCA,Glu-TTC,0	-0.794635	0.576489	0.28433	0.687555	7.16249	7.95713	236.76	120.038	136.8	224.46	129.86	122.791
tRF-58:75-Gln-CTG-2	ATCTCGGTGGAACCTCCA	tRF-3a	-	-	18	tRNA-Gln-CTG-2-1,GGTTCCATGGTGTAATGGTTAGCACTCTGGACTCTGAATCCAGCGATCCGAGTTCAAATCTCGGTGGAACCTCCA,Gln-CTG,57	-0.796707	0.575662	0.127009	0.567442	9.31654	10.1133	552.439	1026.99	733.246	618.679	1376.52	805.814
tRF-60:77-Thr-AGT-1-M2	ATCCCAGCGGTGCCTCCA	tRF-3a	3020a	-	18	tRNA-Thr-AGT-1-1,GGCGCCGTGGCTTAGTTGGTTAAAGCGCCTGTCTAGTAAACAGGAGATCCTGGGTTCGAATCCCAGCGGTGCCTCCA,Thr-AGT,59;tRNA-Thr-AGT-3-1,GGCGCCGTGGCTTAGCTGGTTAAAGCGCCTGTCTAGTAAACAGGAGATCCTGGGTTCGAATCCCAGCGGTGCCTCCA,Thr-AGT,59	-0.797699	0.575266	0.183103	0.637981	7.3209	8.1186	67.6456	360.113	169.632	104.685	308.419	391.395
tRF-1:30-Lys-CTT-3	GCCCGGCTAGCTCAGTCGGTAGAGCATGAG	tRF-5c	-	-	30	tRNA-Lys-CTT-3-1,GCCCGGCTAGCTCAGTCGGTAGAGCATGAGACTCTTAATCTCAGGGTCGTGGGTTCGAGCCCCACGTTGGGCGCCA,Lys-CTT,0	-0.799277	0.574637	0.286388	0.687555	12.356	13.1553	8985.6	3707.83	5291.41	8852.02	3324.43	4742.79
tRF-1:23-Tyr-GTA-3-M2	CCTTCGATAGCTCAGCTGGTAGA	tRF-5b	-	-	23	tRNA-Tyr-GTA-3-1,CCTTCGATAGCTCAGCTGGTAGAGCGGAGGACTGTAGATCCTTAGGTCGCTGGTTCGATTCCGGCTCGAAGGACCA,Tyr-GTA,0;tRNA-Tyr-GTA-4-1,CCTTCGATAGCTCAGCTGGTAGAGCGGAGGACTGTAGATCCTTAGGTCGCTGGTTCGACTCCGGCTCGAAGGACCA,Tyr-GTA,0	-0.803231	0.573064	0.295361	0.687555	5.0886	5.89183	39.46	66.6876	16.416	18.8622	110.381	38.3721
tRF-1:16-Ser-AGA-1-M3	GTAGTCGTGGCCGAGT	tRF-5a	-	-	16	tRNA-Ser-AGA-1-1,GTAGTCGTGGCCGAGTGGTTAAGGCGATGGACTAGAAATCCATTGGGGTTTCCCCGCGCAGGTTCGAATCCTGCCGACTACGCCA,Ser-AGA,0;tRNA-Ser-AGA-2-1,GTAGTCGTGGCCGAGTGGTTAAGGCGATGGACTAGAAATCCATTGGGGTCTCCCCGCGCAGGTTCGAATCCTGCCGACTACGCCA,Ser-AGA,0;tRNA-Ser-TGA-2-1,GTAGTCGTGGCCGAGTGGTTAAGGCGATGGACTTGAAATCCATTGGGGTTTCCCCGCGCAGGTTCGAATCCTGCCGACTACGCCA,Ser-TGA,0	-0.819191	0.56676	0.126779	0.567442	7.62305	8.44224	180.388	306.763	224.351	163.158	246.735	552.558
tRF-1:28-Cys-GCA-1-M3	GGGGGTATAGCTCAGTGGTAGAGCATTT	tRF-5c	-	-	28	tRNA-Cys-GCA-1-1,GGGGGTATAGCTCAGTGGTAGAGCATTTGACTGCAGATCAAGAGGTCCCTGGTTCAAATCCAGGTGCCCCCTCCA,Cys-GCA,0;tRNA-Cys-GCA-2-1,GGGGGTATAGCTCAGTGGTAGAGCATTTGACTGCAGATCAAGAGGTCCCTGGTTCAAATCCGGGTGCCCCCTCCA,Cys-GCA,0;tRNA-Cys-GCA-3-1,GGGGGTATAGCTCAGTGGTAGAGCATTTGACTGCAGATCAAGAGGTCCCCGGTTCAAATCCGGGTGCCCCCTCCA,Cys-GCA,0	-0.825346	0.564347	0.308396	0.693952	6.03204	6.85739	90.1942	66.6876	71.1358	107.514	71.4232	30.6977
tRF-1:29-Gln-TTG-1-M2	GGTCCCATGGTGTAATGGTTAGCACTCTG	tRF-5c	-	-	29	tRNA-Gln-TTG-1-1,GGTCCCATGGTGTAATGGTTAGCACTCTGGACTTTGAATCCAGCGATCCGAGTTCAAATCTCGGTGGGACCTCCA,Gln-TTG,0;tRNA-Gln-TTG-2-1,GGTCCCATGGTGTAATGGTTAGCACTCTGGACTTTGAATCCAGCAATCTGAGTTCAAATCTCGGTGGGACCTCCA,Gln-TTG,0	-0.827613	0.563461	0.395621	0.75938	7.22049	8.0481	377.688	40.0125	71.1358	241.436	129.86	138.14
tRF-59:75-Ala-CGC-1-M4	CCCCGGCATCTCCACCA	tRF-3a	-	-	17	tRNA-Ala-CGC-1-1,GGGGATGTAGCTCAGTGGTAGAGCGCATGCTTCGCATGTATGAGGCCCCGGGTTCGATCCCCGGCATCTCCACCA,Ala-CGC,58;tRNA-Ala-CGC-2-1,GGGGATGTAGCTCAGTGGTAGAGCGCGCGCTTCGCATGTGTGAGGTCCCGGGTTCAATCCCCGGCATCTCCACCA,Ala-CGC,58;tRNA-Ala-TGC-2-1,GGGGATGTAGCTCAGTGGTAGAGCGCATGCTTTGCATGTATGAGGCCCCGGGTTCGATCCCCGGCATCTCCACCA,Ala-TGC,58;tRNA-Ala-TGC-4-1,GGGGATGTAGCTCAGTGGTAGAGCGCATGCTTTGCATGTATGAGGCCCCGGGTTCAATCCCCGGCATCTC…	-0.828678	0.563045	0.113666	0.55338	10.0319	10.8605	817.385	1587.16	1395.36	512.108	2538.77	2632.33
tRF-58:75-Cys-GCA-2-M4	ATCCGGGTGCCCCCTCCA	tRF-3a	3050a	-	18	tRNA-Cys-GCA-2-1,GGGGGTATAGCTCAGTGGTAGAGCATTTGACTGCAGATCAAGAGGTCCCTGGTTCAAATCCGGGTGCCCCCTCCA,Cys-GCA,57;tRNA-Cys-GCA-3-1,GGGGGTATAGCTCAGTGGTAGAGCATTTGACTGCAGATCAAGAGGTCCCCGGTTCAAATCCGGGTGCCCCCTCCA,Cys-GCA,57;tRNA-Cys-GCA-5-1,GGGGGTATAGCTCAGGGGTAGAGCATTTGACTGCAGATCAAGAGGTCCCTGGTTCAAATCCGGGTGCCCCCTCCA,Cys-GCA,57;tRNA-Cys-GCA-7-1,GGGGGTATAGCTCAGGGGTAGAGCATTTGACTGCAGATCAAGAGGTCCCCGGTTCAAATCCGGGTGCCCC…	-0.829468	0.562737	0.0903883	0.536443	8.87364	9.70311	405.874	746.901	547.199	365.926	883.051	1066.74
tiRNA-1:33-Gly-CCC-1	GCGCCGCTGGTGTAGTGGTATCATGCAAGATTC	tiRNA-5	-	-	33	tRNA-Gly-CCC-1-1,GCGCCGCTGGTGTAGTGGTATCATGCAAGATTCCCATTCTTGCGACCCGGGTTCGATTCCCGGGCGGCGCACCA,Gly-CCC,0	-0.831022	0.562131	0.663943	0.919427	2.45377	3.28479	11.2743	0	5.47199	0	19.4791	15.3488
tRF-64:85-Ser-GCT-2-M3	TCGAATCCCATCCTCGTCGCCA	tRF-3b	3021b	-	22	tRNA-Ser-GCT-2-1,GACGAGGTGGCCGAGTGGTTAAGGCGATGGACTGCTAATCCATTGTGCTCTGCACGCATGGGTTCGAATCCCATCCTCGTCGCCA,Ser-GCT,63;tRNA-Ser-GCT-3-1,GACGAGGTGGCCGAGTGGTTAAGGCGATGGACTGCTAATCCATTGTGCTTTGCACGCGTGGGTTCGAATCCCATCCTCGTCGCCA,Ser-GCT,63;tRNA-Ser-GCT-4-1,GACGAGGTGGCCGAGTGGTTAAGGCGATGGACTGCTAATCCATTGTGCTCTGCACGCGTGGGTTCGAATCCCATCCTCGTCGCCA,Ser-GCT,63	-0.848625	0.555314	0.395606	0.75938	3.36254	4.21117	5.63714	6.66876	21.8879	5.65865	25.9721	23.0233
tRF-1:31-Val-CAC-1	GTTTCCGTAGTGTAGTGGTTATCACGCTCGC	tRF-5c	-	-	31	tRNA-Val-CAC-1-1,GTTTCCGTAGTGTAGTGGTTATCACGCTCGCCTCACACGCGAGAGGTCCCCGGTTCGAAACCGGGCGGAAACACCA,Val-CAC,0	-0.851732	0.554119	0.280142	0.687555	4.74592	5.59765	28.1857	26.675	38.3039	22.6346	81.1628	15.3488
tRF-1:29-Glu-CTC-1	TCCCTGGTGGTCTAGTGGTTAGGATTCGG	tRF-5c	-	-	29	tRNA-Glu-CTC-1-1,TCCCTGGTGGTCTAGTGGTTAGGATTCGGCGCTCTCACCGCCGCGGCCCGGGTTCGATTCCCGGTCAGGGAACCA,Glu-CTC,0	-0.856065	0.552457	0.236642	0.672305	14.1504	15.0065	29098.9	12924	20640.3	31403.6	16050.7	14228.4
tRF-1:22-chrM.Ser-GCT	AAGAAAGATTGCAAGAACTGCT	tRF-5b	-	-	22	chrM.tRNA12-SerGCT,AAGAAAGATTGCAAGAACTGCTAATTCATGCTTCCATGTTTAAAAACATGGCTTTCTTACCA,Ser-GCT,0	-0.856305	0.552366	0.669836	0.919427	1.09528	1.95159	0	6.66876	0	0	6.49302	7.67442
tRF-1:32-Val-AAC-1-M2	GTTTCCGTAGTGTAGTGGTTATCACGTTCGCC	tRF-5c	-	-	32	tRNA-Val-AAC-1-1,GTTTCCGTAGTGTAGTGGTTATCACGTTCGCCTAACACGCGAAAGGTCCCCGGTTCGAAACCGGGCGGAAACACCA,Val-AAC,0;tRNA-Val-CAC-2-1,GTTTCCGTAGTGTAGTGGTTATCACGTTCGCCTCACACGCGAAAGGTCCCCGGTTCGAAACCGGGCGGAAACACCA,Val-CAC,0	-0.862242	0.550097	0.12429	0.567442	8.45276	9.31501	197.3	413.463	656.638	173.532	824.614	959.303
tRF-1:30-Gly-TCC-1	GCGTTGGTGGTATAGTGGTGAGCATAGCTG	tRF-5c	-	-	30	tRNA-Gly-TCC-1-1,GCGTTGGTGGTATAGTGGTGAGCATAGCTGCCTTCCAAGCAGTTGACCCGGGTTCGATTCCCGGCCAACGCACCA,Gly-TCC,0	-0.876253	0.544781	0.21337	0.656828	7.39472	8.27097	253.671	180.056	153.216	280.103	146.093	168.837
tRF-59:75-Gln-CTG-1-M7	TCTCGGTGGGACCTCCA	tRF-3a	-	-	17	tRNA-Gln-CTG-1-1,GGTTCCATGGTGTAATGGTTAGCACTCTGGACTCTGAATCCAGCGACCCGAGTTCAAATCTCGGTGGGACCTCCA,Gln-CTG,58;tRNA-Gln-CTG-3-1,GGTTCCATGGTGTAATGGTTAGCACTCTGGACTCTGAATCCAGCGATCCGAGTTCAAATCTCGGTGGGACCTCCA,Gln-CTG,58;tRNA-Gln-CTG-4-1,GGTTCCATGGTGTAATGGTGAGCACTCTGGACTCTGAATCCAGCGATCCGAGTTCAAATCTCGGTGGGACCTCCA,Gln-CTG,58;tRNA-Gln-TTG-1-1,GGTCCCATGGTGTAATGGTTAGCACTCTGGACTTTGAATCCAGCGATCCGAGTTCAAATCTCGGTGGGAC…	-0.879133	0.543694	0.073166	0.513088	9.43843	10.3176	642.634	1040.33	820.798	501.734	1642.73	1481.16
tRF-1:31-Val-AAC-1-M2	GTTTCCGTAGTGTAGTGGTTATCACGTTCGC	tRF-5c	-	-	31	tRNA-Val-AAC-1-1,GTTTCCGTAGTGTAGTGGTTATCACGTTCGCCTAACACGCGAAAGGTCCCCGGTTCGAAACCGGGCGGAAACACCA,Val-AAC,0;tRNA-Val-CAC-2-1,GTTTCCGTAGTGTAGTGGTTATCACGTTCGCCTCACACGCGAAAGGTCCCCGGTTCGAAACCGGGCGGAAACACCA,Val-CAC,0	-0.881885	0.542658	0.0883255	0.536443	8.91775	9.79963	473.52	440.138	798.91	443.261	1100.57	813.489
tRF-1:31-His-GTG-3	GCCGTGATCGTATAGGGGTTAGTACTCTGCG	tRF-5c	-	-	31	tRNA-His-GTG-3-1,GCCGTGATCGTATAGGGGTTAGTACTCTGCGTTGTGGCCGCAGCAACCTCGGTTCGAATCCGAGTCACGGCACCA,His-GTG,0	-0.896446	0.537208	0.455425	0.82723	4.10905	5.00549	22.5485	26.675	10.944	33.9519	0	15.3488
tRF-68:85-Leu-AAG-1-M4	ATCCCACCGCTGCCACCA	tRF-3a	3015a	-	18	tRNA-Leu-AAG-1-1,GGTAGCGTGGCCGAGCGGTCTAAGGCGCTGGATTAAGGCTCCAGTCTCTTCGGGGGCGTGGGTTCGAATCCCACCGCTGCCACCA,Leu-AAG,67;tRNA-Leu-AAG-2-1,GGTAGTGTGGCCGAGCGGTCTAAGGCGCTGGATTAAGGCTCCAGTCTCTTCGGGGGCGTGGGTTCGAATCCCACCGCTGCCACCA,Leu-AAG,67;tRNA-Leu-TAG-1-1,GGTAGCGTGGCCGAGCGGTCTAAGGCGCTGGATTTAGGCTCCAGTCTCTTCGGAGGCGTGGGTTCGAATCCCACCGCTGCCACCA,Leu-TAG,67;tRNA-Leu-TAG-3-1,GGTAGCGTGGCCGAGTGGTCTAAGGCGCTGGATTTAGGCT…	-0.901176	0.53545	0.0861446	0.536443	10.8771	11.7783	1522.03	3394.4	1958.97	1231.7	4450.97	4589.3
tRF-1:29-Val-TAC-1	GGTTCCATAGTGTAGCGGTTATCACGTCT	tRF-5c	-	-	29	tRNA-Val-TAC-1-1,GGTTCCATAGTGTAGCGGTTATCACGTCTGCTTTACACGCAGAAGGTCCTGGGTTCGAGCCCCAGTGGAACCACCA,Val-TAC,0	-0.903412	0.534621	0.496887	0.857555	4.48889	5.3923	50.7342	0	21.8879	44.3261	12.986	7.67442
tRF-1:29-Gln-CTG-4	GGTTCCATGGTGTAATGGTGAGCACTCTG	tRF-5c	-	-	29	tRNA-Gln-CTG-4-1,GGTTCCATGGTGTAATGGTGAGCACTCTGGACTCTGAATCCAGCGATCCGAGTTCAAATCTCGGTGGGACCTCCA,Gln-CTG,0	-0.909326	0.532434	0.296677	0.687555	5.02185	5.93118	56.3714	33.3438	21.8879	50.9279	48.6977	15.3488
tRF-1:28-Glu-CTC-1	TCCCTGGTGGTCTAGTGGTTAGGATTCG	tRF-5c	-	-	28	tRNA-Glu-CTC-1-1,TCCCTGGTGGTCTAGTGGTTAGGATTCGGCGCTCTCACCGCCGCGGCCCGGGTTCGATTCCCGGTCAGGGAACCA,Glu-CTC,0	-0.910056	0.532164	0.189644	0.644155	11.5286	12.4387	4216.58	2774.2	3321.5	5212.56	2480.33	2877.91
tRF-59:75-Ala-AGC-2-M2	CCCCGGCACCTCCACCA	tRF-3a	-	-	17	tRNA-Ala-AGC-2-1,GGGGGTGTAGCTCAGTGGTAGAGCGCGTGCTTAGCATGCACGAGGCCCCGGGTTCAATCCCCGGCACCTCCACCA,Ala-AGC,58;tRNA-Ala-TGC-1-1,GGGGGTGTAGCTCAGTGGTAGAGCGCATGCTTTGCATGCATGAGGCCCCGGGTTCGATCCCCGGCACCTCCACCA,Ala-TGC,58	-0.91286	0.531131	0.0889321	0.536443	8.18132	9.09418	180.388	500.157	383.039	169.76	662.288	813.489
tRF-1:28-Pro-AGG-1-M5	GGCTCGTTGGTCTAGGGGTATGATTCTC	tRF-5c	-	-	28	tRNA-Pro-AGG-1-1,GGCTCGTTGGTCTAGGGGTATGATTCTCGCTTAGGGTGCGAGAGGTCCCGGGTTCAAATCCCGGACGAGCCCCCA,Pro-AGG,0;tRNA-Pro-CGG-1-1,GGCTCGTTGGTCTAGGGGTATGATTCTCGCTTCGGGTGCGAGAGGTCCCGGGTTCAAATCCCGGACGAGCCCCCA,Pro-CGG,0;tRNA-Pro-TGG-1-1,GGCTCGTTGGTCTAGGGGTATGATTCTCGGTTTGGGTCCGAGAGGTCCCGGGTTCAAATCCCGGACGAGCCCCCA,Pro-TGG,0;tRNA-Pro-TGG-2-1,GGCTCGTTGGTCTAGGGGTATGATTCTCGCTTTGGGTGCGAGAGGTCCCGGGTTCAAATCCCGGACGAGCCCC…	-0.923251	0.527319	0.204676	0.65535	5.38517	6.30842	22.5485	93.3626	38.3039	59.4159	48.6977	61.3954
tRF-1:31-iMet-CAT-1-M2	AGCAGAGTGGCGCAGCGGAAGCGTGCTGGGC	tRF-5c	-	-	31	tRNA-iMet-CAT-1-1,AGCAGAGTGGCGCAGCGGAAGCGTGCTGGGCCCATAACCCAGAGGTCGATGGATCGAAACCATCCTCTGCTACCA,iMet-CAT,0;tRNA-iMet-CAT-3-1,AGCAGAGTGGCGCAGCGGAAGCGTGCTGGGCCCATAACCCAGAGGTCGATAGATCGAAACCATCCTCTGCTACCA,iMet-CAT,0	-0.92814	0.525536	0.668219	0.919427	2.43061	3.35875	5.63714	0	10.944	8.48798	6.49302	0
tRF-1:28-Gly-GCC-2-M3	GCATTGGTGGTTCAGTGGTAGAATTCTC	tRF-5c	-	-	28	tRNA-Gly-GCC-2-1,GCATTGGTGGTTCAGTGGTAGAATTCTCGCCTGCCACGCGGGAGGCCCGGGTTCGATTCCCGGCCAATGCACCA,Gly-GCC,0;tRNA-Gly-GCC-3-1,GCATTGGTGGTTCAGTGGTAGAATTCTCGCCTGCCACGCGGGAGGCCCGGGTTTGATTCCCGGCCAATGCACCA,Gly-GCC,0;tRNA-Gly-GCC-4-1,GCATTGGTGGTTCAGTGGTAGAATTCTCGCCTGCCACGCGGGAGGCCCGGGTTCGGTTCCCGGCCAATGCACCA,Gly-GCC,0	-0.928702	0.525331	0.208574	0.65535	15.1686	16.0974	62955.6	24841.1	38468.1	66917.3	35166.2	29178.1
tRF-58:75-Ala-AGC-1	TCCCCAGCACCTCCACCA	tRF-3a	-	-	18	tRNA-Ala-AGC-1-1,GGGGGTGTAGCTCAGTGGTAGAGCGCGTGCTTAGCATGCACGAGGCCCTGGGTTCGATCCCCAGCACCTCCACCA,Ala-AGC,57	-0.928959	0.525237	0.0609264	0.466316	8.88975	9.81871	411.511	766.907	541.727	316.885	1087.58	1243.26
tRF-58:75-Thr-CGT-1-M2	ACCCCGTCCGTGCCTCCA	tRF-3a	-	-	18	tRNA-Thr-CGT-1-1,GGCGCGGTGGCCAAGTGGTAAGGCGTCGGTCTCGTAAACCGAAGATCACGGGTTCGAACCCCGTCCGTGCCTCCA,Thr-CGT,57;tRNA-Thr-CGT-2-1,GGCGCGGTGGCCAAGTGGTAAGGCGTCGGTCTCGTAAACCGAAGATCGCGGGTTCGAACCCCGTCCGTGCCTCCA,Thr-CGT,57	-0.940965	0.520885	0.120631	0.563019	5.72416	6.66512	22.5485	100.031	71.1358	40.5537	116.874	130.465
tRF-59:75-Ala-CGC-3-M7	TCCCGGCATCTCCACCA	tRF-3a	-	-	17	tRNA-Ala-CGC-3-1,GGGGATGTAGCTCAGAGGTAGAGCACATGCTTCGCATGTGTGTGGTCCCGGGTTCGACTCCCGGCATCTCCACCA,Ala-CGC,58;tRNA-Ala-CGC-4-1,GGGGTTGTAGCTCAGAGGTAGAGCACATGCTTCGCATGTGTGTGGTCCCGGGTTCGATTCCCGGCATCTCCACCA,Ala-CGC,58;tRNA-Ala-CGC-7-1,GGGGATGTAGCTCAGAGGTAGAGCACGTGCTTCGCATGTGTGTGGTCCCGGGGTTCGATTCCCGGCATCTCCACCA,Ala-CGC,59;tRNA-Ala-TGC-5-1,GGGGATGTAGCTCAGCGGTAGAGCACATGCTTTGCATGTATGGGGTCCCGGGTTCGATTCCCGGCATCT…	-0.945092	0.519396	0.255428	0.673844	3.93165	4.87674	5.63714	26.675	21.8879	11.3173	38.9581	30.6977
tRF-1:29-Ala-CGC-5	TCCCTGGTAGTCTAGTGGTTAGGATTCGG	tRF-5c	-	-	29	tRNA-Ala-CGC-5-1,TCCCTGGTAGTCTAGTGGTTAGGATTCGGTGCTCGCACCGCCGTGGCCCAGGTTTGAATCCTAGTCAGGGAACCA,Ala-CGC,0	-0.950439	0.517475	0.246304	0.673844	4.76519	5.71563	45.0971	20.0063	27.3599	41.4968	32.4651	30.6977
tRF-1:14-Lys-CTT-2-M2	GCCCGGCTAGCTCA	tRF-5a	-	-	14	tRNA-Lys-CTT-2-1,GCCCGGCTAGCTCAGTCGGTAGAGCATGGGACTCTTAATCCCAGGGTCGTGGGTTCGAGCCCCACGTTGGGCGCCA,Lys-CTT,0;tRNA-Lys-CTT-3-1,GCCCGGCTAGCTCAGTCGGTAGAGCATGAGACTCTTAATCTCAGGGTCGTGGGTTCGAGCCCCACGTTGGGCGCCA,Lys-CTT,0	-0.950967	0.517286	0.309397	0.693952	4.29781	5.24878	11.2743	0	54.7199	8.48798	45.4512	69.0698
tRF-1:30-Val-TAC-1	GGTTCCATAGTGTAGCGGTTATCACGTCTG	tRF-5c	-	-	30	tRNA-Val-TAC-1-1,GGTTCCATAGTGTAGCGGTTATCACGTCTGCTTTACACGCAGAAGGTCCTGGGTTCGAGCCCCAGTGGAACCACCA,Val-TAC,0	-0.964949	0.512296	0.326275	0.712231	4.93972	5.90467	33.8228	60.0188	16.416	61.3021	19.4791	15.3488
tRF-1:29-Thr-TGT-2	GGCCCTATAGCTCAGGGGTTAGAGCACTG	tRF-5c	-	-	29	tRNA-Thr-TGT-2-1,GGCCCTATAGCTCAGGGGTTAGAGCACTGGTCTTGTAAACCAGGGGTCGCGAGTTCAAATCTCGCTGGGGCCTCCA,Thr-TGT,0	-0.972147	0.509747	0.46058	0.827487	4.13648	5.10863	39.46	13.3375	5.47199	35.8381	3.24651	15.3488
tRF-1:23-Val-AAC-1-M4	GTTTCCGTAGTGTAGTGGTTATC	tRF-5b	-	-	23	tRNA-Val-AAC-1-1,GTTTCCGTAGTGTAGTGGTTATCACGTTCGCCTAACACGCGAAAGGTCCCCGGTTCGAAACCGGGCGGAAACACCA,Val-AAC,0;tRNA-Val-AAC-5-1,GTTTCCGTAGTGTAGTGGTTATCACATTCGCCTAACACGCGAAAGGTCCCCGGTTCGAAACCGGGCGGAAACACCA,Val-AAC,0;tRNA-Val-CAC-1-1,GTTTCCGTAGTGTAGTGGTTATCACGCTCGCCTCACACGCGAGAGGTCCCCGGTTCGAAACCGGGCGGAAACACCA,Val-CAC,0;tRNA-Val-CAC-2-1,GTTTCCGTAGTGTAGTGGTTATCACGTTCGCCTCACACGCGAAAGGTCCCCGGTTCGAAACCGGGCGGAA…	-0.977849	0.507736	0.0774664	0.525522	11.7532	12.7311	3461.2	5134.94	3830.39	4221.36	7541.64	4788.84
tRF-1:29-Pro-AGG-1-M4	GGCTCGTTGGTCTAGGGGTATGATTCTCG	tRF-5c	-	-	29	tRNA-Pro-AGG-1-1,GGCTCGTTGGTCTAGGGGTATGATTCTCGCTTAGGGTGCGAGAGGTCCCGGGTTCAAATCCCGGACGAGCCCCCA,Pro-AGG,0;tRNA-Pro-CGG-1-1,GGCTCGTTGGTCTAGGGGTATGATTCTCGCTTCGGGTGCGAGAGGTCCCGGGTTCAAATCCCGGACGAGCCCCCA,Pro-CGG,0;tRNA-Pro-TGG-1-1,GGCTCGTTGGTCTAGGGGTATGATTCTCGGTTTGGGTCCGAGAGGTCCCGGGTTCAAATCCCGGACGAGCCCCCA,Pro-TGG,0;tRNA-Pro-TGG-2-1,GGCTCGTTGGTCTAGGGGTATGATTCTCGCTTTGGGTGCGAGAGGTCCCGGGTTCAAATCCCGGACGAGCCCC…	-0.981413	0.506483	0.156223	0.603086	5.67083	6.65224	67.6456	86.6938	27.3599	66.0176	45.4512	130.465
tRF-1:29-Lys-CTT-3	GCCCGGCTAGCTCAGTCGGTAGAGCATGA	tRF-5c	-	-	29	tRNA-Lys-CTT-3-1,GCCCGGCTAGCTCAGTCGGTAGAGCATGAGACTCTTAATCTCAGGGTCGTGGGTTCGAGCCCCACGTTGGGCGCCA,Lys-CTT,0	-0.993015	0.502427	0.153659	0.603086	8.74589	9.73891	614.448	480.15	410.399	782.78	324.651	552.558
tRF-55:76-Ala-AGC-4	TCGATGCCCGCATCCTCCACCA	tRF-3b	3039b	-	22	tRNA-Ala-AGC-4-1,GGGGGATTAGCTCAAATGGTAGAGCGCTCGCTTAGCATGCGAGAGGTAGCGGGATCGATGCCCGCATCCTCCACCA,Ala-AGC,54	-0.994067	0.50206	0.49167	0.857555	2.43899	3.43306	0	13.3375	5.47199	5.65865	6.49302	15.3488
tRF-1:15-Gly-ACC-1-M8	GTTTCCGTAGTGTAG	tRF-5a	-	-	15	tRNA-Gly-ACC-1-1,GTTTCCGTAGTGTAGTGGTTAGCGCGTTCGCCTACCAAAGCGAAAGGTCCCCGGTTCGAAACCGGGCGGAAACACCA,Gly-ACC,0;tRNA-Val-AAC-1-1,GTTTCCGTAGTGTAGTGGTTATCACGTTCGCCTAACACGCGAAAGGTCCCCGGTTCGAAACCGGGCGGAAACACCA,Val-AAC,0;tRNA-Val-AAC-2-1,GTTTCCGTAGTGTAGTGGTCATCACGCTCGCCTAACACGCGAGAGGTCCCCGGTTCGAAACCGGGCGGAAACACCA,Val-AAC,0;tRNA-Val-AAC-3-1,GTTTCCGTAGTGTAGTGGTCATCACGCTCGCCTAACACGCGAGAGGTCCCCGGTTCGAAACCGGGCGGG…	-1.00043	0.499852	0.0470748	0.420636	9.78456	10.785	992.136	1253.73	908.35	959.142	1714.16	1895.58
tRF-1:29-Cys-GCA-1-M3	GGGGGTATAGCTCAGTGGTAGAGCATTTG	tRF-5c	-	-	29	tRNA-Cys-GCA-1-1,GGGGGTATAGCTCAGTGGTAGAGCATTTGACTGCAGATCAAGAGGTCCCTGGTTCAAATCCAGGTGCCCCCTCCA,Cys-GCA,0;tRNA-Cys-GCA-2-1,GGGGGTATAGCTCAGTGGTAGAGCATTTGACTGCAGATCAAGAGGTCCCTGGTTCAAATCCGGGTGCCCCCTCCA,Cys-GCA,0;tRNA-Cys-GCA-3-1,GGGGGTATAGCTCAGTGGTAGAGCATTTGACTGCAGATCAAGAGGTCCCCGGTTCAAATCCGGGTGCCCCCTCCA,Cys-GCA,0	-1.00122	0.499578	0.175018	0.631416	8.89702	9.89824	563.714	373.45	733.246	907.271	405.814	475.814
tRF-1:30-Gly-CCC-3-M2	GCATTGGTGGTTCAATGGTAGAATTCTCGC	tRF-5c	-	-	30	tRNA-Gly-CCC-3-1,GCATTGGTGGTTCAATGGTAGAATTCTCGCCTCCCACGCGGGTGACCCGGGTTCGATTCCCGGCCAATGCACCA,Gly-CCC,0;tRNA-Gly-CCC-4-1,GCATTGGTGGTTCAATGGTAGAATTCTCGCCTCCCACTCGGGTGACCCGGGTTCGATTCCCGGCCAATGCACCA,Gly-CCC,0	-1.00134	0.499536	0.141645	0.578983	7.13285	8.13419	112.743	146.713	240.767	245.208	136.353	176.512
tRF-56:74-Gly-CCC-1	ATTCCCGGGCGGCGCACCA	tRF-3b	-	-	19	tRNA-Gly-CCC-1-1,GCGCCGCTGGTGTAGTGGTATCATGCAAGATTCCCATTCTTGCGACCCGGGTTCGATTCCCGGGCGGCGCACCA,Gly-CCC,55	-1.00994	0.496567	0.667811	0.919427	1.10435	2.11429	5.63714	0	0	2.82933	3.24651	0
tRF-64:85-Ser-AGA-1-M3	TCGAATCCTGCCGACTACGCCA	tRF-3b	3025b	-	22	tRNA-Ser-AGA-1-1,GTAGTCGTGGCCGAGTGGTTAAGGCGATGGACTAGAAATCCATTGGGGTTTCCCCGCGCAGGTTCGAATCCTGCCGACTACGCCA,Ser-AGA,63;tRNA-Ser-AGA-2-1,GTAGTCGTGGCCGAGTGGTTAAGGCGATGGACTAGAAATCCATTGGGGTCTCCCCGCGCAGGTTCGAATCCTGCCGACTACGCCA,Ser-AGA,63;tRNA-Ser-TGA-2-1,GTAGTCGTGGCCGAGTGGTTAAGGCGATGGACTTGAAATCCATTGGGGTTTCCCCGCGCAGGTTCGAATCCTGCCGACTACGCCA,Ser-TGA,63	-1.01651	0.494312	0.241939	0.673844	3.74576	4.76227	5.63714	6.66876	32.8319	5.65865	25.9721	61.3954
tRF-1:28-Gly-GCC-1	GCATGGGTGGTTCAGTGGTAGAATTCTC	tRF-5c	-	-	28	tRNA-Gly-GCC-1-1,GCATGGGTGGTTCAGTGGTAGAATTCTCGCCTGCCACGCGGGAGGCCCGGGTTCGATTCCCGGCCCATGCACCA,Gly-GCC,0	-1.01764	0.493923	0.161788	0.609731	12.9256	13.9433	12638.5	5601.76	8552.71	15080.3	7746.17	6584.65
tRF-1:15-Ala-AGC-1-M3	GGGGGTGTAGCTCAG	tRF-5a	-	-	15	tRNA-Ala-AGC-1-1,GGGGGTGTAGCTCAGTGGTAGAGCGCGTGCTTAGCATGCACGAGGCCCTGGGTTCGATCCCCAGCACCTCCACCA,Ala-AGC,0;tRNA-Ala-AGC-2-1,GGGGGTGTAGCTCAGTGGTAGAGCGCGTGCTTAGCATGCACGAGGCCCCGGGTTCAATCCCCGGCACCTCCACCA,Ala-AGC,0;tRNA-Ala-TGC-1-1,GGGGGTGTAGCTCAGTGGTAGAGCGCATGCTTTGCATGCATGAGGCCCCGGGTTCGATCCCCGGCACCTCCACCA,Ala-TGC,0	-1.02321	0.49202	0.160372	0.609269	4.54287	5.56608	11.2743	26.675	43.7759	20.7484	48.6977	61.3954
tRF-1:29-Asp-GTC-1-M2	TCCTCGTTAGTATAGTGGTGAGTATCCCC	tRF-5c	-	-	29	tRNA-Asp-GTC-1-1,TCCTCGTTAGTATAGTGGTGAGTATCCCCGCCTGTCACGCGGGAGACCGGGGTTCGATTCCCCGACGGGGAGCCA,Asp-GTC,0;tRNA-Asp-GTC-4-1,TCCTCGTTAGTATAGTGGTGAGTATCCCCGCCTGTCACACAGGAGACCGGGGTTCGATTCCCCGATGGGGAGCCA,Asp-GTC,0	-1.03072	0.489467	0.260849	0.679172	5.76325	6.79397	95.8313	40.0125	49.2479	110.344	42.2046	38.3721
tRF-1:28-Glu-TTC-3	TCCCTGGTGGTCTAGTGGCTAGGATTCG	tRF-5c	-	-	28	tRNA-Glu-TTC-3-1,TCCCTGGTGGTCTAGTGGCTAGGATTCGGCGCTTTCACCGCCGCGGCCCGGGTTCGATTCCCGGTCAGGGAACCA,Glu-TTC,0	-1.03262	0.48882	0.139702	0.578983	5.22855	6.26117	67.6456	33.3438	27.3599	52.8141	45.4512	76.7442
tRF-1:23-Ala-AGC-3-M8	GGGGATGTAGCTCAGTGGTAGAG	tRF-5b	-	-	23	tRNA-Ala-AGC-3-1,GGGGATGTAGCTCAGTGGTAGAGCGCATGCTTAGCATGCATGAGGTCCTGGGTTCGATCCCCAGCATCTCCACCA,Ala-AGC,0;tRNA-Ala-AGC-8-1,GGGGATGTAGCTCAGTGGTAGAGCGCATGCTTAGCATGCATGAGGTCCTGGGTTCGATCTCCAGGTTTTTTTCCA,Ala-AGC,0;tRNA-Ala-CGC-1-1,GGGGATGTAGCTCAGTGGTAGAGCGCATGCTTCGCATGTATGAGGCCCCGGGTTCGATCCCCGGCATCTCCACCA,Ala-CGC,0;tRNA-Ala-CGC-2-1,GGGGATGTAGCTCAGTGGTAGAGCGCGCGCTTCGCATGTGTGAGGTCCCGGGTTCAATCCCCGGCATCTCCAC…	-1.04025	0.486243	0.0941403	0.536443	5.37392	6.41417	28.1857	60.0188	60.1918	25.4639	81.1628	161.163
tRF-1:15-Val-TAC-1	GGTTCCATAGTGTAG	tRF-5a	-	-	15	tRNA-Val-TAC-1-1,GGTTCCATAGTGTAGCGGTTATCACGTCTGCTTTACACGCAGAAGGTCCTGGGTTCGAGCCCCAGTGGAACCACCA,Val-TAC,0	-1.05401	0.481626	0.052482	0.433956	7.39249	8.4465	124.017	193.394	284.543	175.418	324.651	429.768
tRF-53:72-Ala-AGC-1	TTCGATCCCCAGCACCTCCA	tRF-3b	-	-	20	tRNA-Ala-AGC-1-1,GGGGGTGTAGCTCAGTGGTAGAGCGCGTGCTTAGCATGCACGAGGCCCTGGGTTCGATCCCCAGCACCTCCACCA,Ala-AGC,52	-1.06207	0.478945	0.263439	0.679172	3.55526	4.61732	5.63714	0	32.8319	6.60176	25.9721	46.0465
tRF-1:29-Gly-TCC-1	GCGTTGGTGGTATAGTGGTGAGCATAGCT	tRF-5c	-	-	29	tRNA-Gly-TCC-1-1,GCGTTGGTGGTATAGTGGTGAGCATAGCTGCCTTCCAAGCAGTTGACCCGGGTTCGATTCCCGGCCAACGCACCA,Gly-TCC,0	-1.06825	0.476898	0.195095	0.644155	7.3162	8.38445	259.308	180.056	114.912	322.543	81.1628	214.884
tRF-1:16-Ser-AGA-3	GTAGTCGTGGCCAAGT	tRF-5a	-	-	16	tRNA-Ser-AGA-3-1,GTAGTCGTGGCCAAGTGAGTAAGGCAATGGACTAGAAATCCATTGGGGTCTCCCAGCACAGGTTCAAATCCTGCTGACTATGCCA,Ser-AGA,0	-1.07735	0.473899	0.449726	0.821217	1.07856	2.15591	0	0	5.47199	0	0	23.0233
tRF-1:30-Val-AAC-1-M2	GTTTCCGTAGTGTAGTGGTTATCACGTTCG	tRF-5c	-	-	30	tRNA-Val-AAC-1-1,GTTTCCGTAGTGTAGTGGTTATCACGTTCGCCTAACACGCGAAAGGTCCCCGGTTCGAAACCGGGCGGAAACACCA,Val-AAC,0;tRNA-Val-CAC-2-1,GTTTCCGTAGTGTAGTGGTTATCACGTTCGCCTCACACGCGAAAGGTCCCCGGTTCGAAACCGGGCGGAAACACCA,Val-CAC,0	-1.07885	0.473406	0.380587	0.755718	4.99466	6.07351	50.7342	6.66876	49.2479	75.4487	16.2326	7.67442
tRF-1:28-Gly-CCC-2	GCATTGGTAGTTCAATGGTAGAATTCTC	tRF-5c	-	-	28	tRNA-Gly-CCC-2-1,GCATTGGTAGTTCAATGGTAGAATTCTCGCCTCCCACGCGGGTGACCCGGGTTCGATTCCCGGCCAATGCACCA,Gly-CCC,0	-1.09005	0.469744	0.342208	0.721209	4.11684	5.20689	33.8228	13.3375	10.944	35.8381	9.73953	15.3488
tRF-1:29-Gly-CCC-1	GCGCCGCTGGTGTAGTGGTATCATGCAAG	tRF-5c	-	-	29	tRNA-Gly-CCC-1-1,GCGCCGCTGGTGTAGTGGTATCATGCAAGATTCCCATTCTTGCGACCCGGGTTCGATTCCCGGGCGGCGCACCA,Gly-CCC,0	-1.09181	0.469173	0.50173	0.859991	4.0061	5.09791	39.46	13.3375	0	35.8381	16.2326	0
tRF-1:16-Lys-CTT-2-M2	GCCCGGCTAGCTCAGT	tRF-5a	-	-	16	tRNA-Lys-CTT-2-1,GCCCGGCTAGCTCAGTCGGTAGAGCATGGGACTCTTAATCCCAGGGTCGTGGGTTCGAGCCCCACGTTGGGCGCCA,Lys-CTT,0;tRNA-Lys-CTT-3-1,GCCCGGCTAGCTCAGTCGGTAGAGCATGAGACTCTTAATCTCAGGGTCGTGGGTTCGAGCCCCACGTTGGGCGCCA,Lys-CTT,0	-1.11547	0.461541	0.142133	0.578983	4.08295	5.19842	11.2743	26.675	21.8879	9.43109	35.7116	76.7442
tRF-1:29-Glu-TTC-1	TCCCACATGGTCTAGCGGTTAGGATTCCT	tRF-5c	-	-	29	tRNA-Glu-TTC-1-1,TCCCACATGGTCTAGCGGTTAGGATTCCTGGTTTTCACCCAGGCGGCCCGGGTTCGACTCCCGGTGTGGGAACCA,Glu-TTC,0	-1.12169	0.459556	0.12228	0.564527	10.8206	11.9423	2852.39	1373.76	2019.16	3701.7	1639.49	2148.84
tRF-1:29-Thr-TGT-3	GGCTCCATAGCTCAGGGGTTAGAGCACTG	tRF-5c	-	-	29	tRNA-Thr-TGT-3-1,GGCTCCATAGCTCAGGGGTTAGAGCACTGGTCTTGTAAACCAGGGGTCGCGAGTTCAAATCTCGCTGGGGCCTCCA,Thr-TGT,0	-1.13219	0.456223	0.233192	0.670905	7.61643	8.74862	343.865	86.6938	235.295	455.522	168.819	92.093
tRF-53:72-Ala-CGC-1-M2	TTCGATCCCCGGCATCTCCA	tRF-3b	-	-	20	tRNA-Ala-CGC-1-1,GGGGATGTAGCTCAGTGGTAGAGCGCATGCTTCGCATGTATGAGGCCCCGGGTTCGATCCCCGGCATCTCCACCA,Ala-CGC,52;tRNA-Ala-TGC-2-1,GGGGATGTAGCTCAGTGGTAGAGCGCATGCTTTGCATGTATGAGGCCCCGGGTTCGATCCCCGGCATCTCCACCA,Ala-TGC,52	-1.14112	0.453407	0.182195	0.637981	4.19381	5.33493	5.63714	20.0063	38.3039	27.3502	42.2046	15.3488
tRF-54:75-Asp-GTC-1	TCGATTCCCCGACGGGGAGCCA	tRF-3b	3040b	-	22	tRNA-Asp-GTC-1-1,TCCTCGTTAGTATAGTGGTGAGTATCCCCGCCTGTCACGCGGGAGACCGGGGTTCGATTCCCCGACGGGGAGCCA,Asp-GTC,53	-1.16125	0.447125	0.373396	0.755718	2.43936	3.60061	0	13.3375	5.47199	3.77244	16.2326	15.3488
tRF-1:15-His-GTG-2-M2	GCCGTGATCGTATAG	tRF-5a	-	-	15	tRNA-His-GTG-2-1,GCCGTGATCGTATAGTGGTTAGTACTCTGCGTTGTGGCCGCAGCAACCTCGGTTCGAATCCGAGTCACGGCACCA,His-GTG,0;tRNA-His-GTG-3-1,GCCGTGATCGTATAGGGGTTAGTACTCTGCGTTGTGGCCGCAGCAACCTCGGTTCGAATCCGAGTCACGGCACCA,His-GTG,0	-1.17275	0.443576	0.106159	0.553325	4.85851	6.03126	33.8228	60.0188	10.944	39.6106	61.6837	53.7209
tRF-61:77-Ile-AAT-1-M2	CCCCGTACGGGCCACCA	tRF-3a	-	-	17	tRNA-Ile-AAT-1-1,GGCCGGTTAGCTCAGTTGGTTAGAGCGTGGTGCTAATAACGCCAAGGTCGCGGGTTCGATCCCCGTACGGGCCACCA,Ile-AAT,60;tRNA-Ile-AAT-3-1,GGCCGGTTAGCTCAGTTGGTTAGAGTGTGGTGCTAATAACGCCAAGGTCGCGGGTTCGATCCCCGTACGGGCCACCA,Ile-AAT,60	-1.1739	0.44322	0.20622	0.65535	3.38049	4.55439	11.2743	13.3375	10.944	7.54487	16.2326	53.7209
tRF-58:75-Ala-CGC-1-M4	TCCCCGGCATCTCCACCA	tRF-3a	3037a	-	18	tRNA-Ala-CGC-1-1,GGGGATGTAGCTCAGTGGTAGAGCGCATGCTTCGCATGTATGAGGCCCCGGGTTCGATCCCCGGCATCTCCACCA,Ala-CGC,57;tRNA-Ala-CGC-2-1,GGGGATGTAGCTCAGTGGTAGAGCGCGCGCTTCGCATGTGTGAGGTCCCGGGTTCAATCCCCGGCATCTCCACCA,Ala-CGC,57;tRNA-Ala-TGC-2-1,GGGGATGTAGCTCAGTGGTAGAGCGCATGCTTTGCATGTATGAGGCCCCGGGTTCGATCCCCGGCATCTCCACCA,Ala-TGC,57;tRNA-Ala-TGC-4-1,GGGGATGTAGCTCAGTGGTAGAGCGCATGCTTTGCATGTATGAGGCCCCGGGTTCAATCCCCGGCATCTC…	-1.18105	0.44103	0.0276348	0.356039	11.9616	13.1426	3213.17	6181.94	5088.95	3083.97	10856.3	12724.2
tRF-1:29-Lys-CTT-2	GCCCGGCTAGCTCAGTCGGTAGAGCATGG	tRF-5c	-	-	29	tRNA-Lys-CTT-2-1,GCCCGGCTAGCTCAGTCGGTAGAGCATGGGACTCTTAATCCCAGGGTCGTGGGTTCGAGCCCCACGTTGGGCGCCA,Lys-CTT,0	-1.18579	0.439584	0.295721	0.687555	5.37563	6.56142	90.1942	26.675	21.8879	103.742	12.986	30.6977
tRF-1:14-Gly-TCC-1	GCGTTGGTGGTATA	tRF-5a	-	-	14	tRNA-Gly-TCC-1-1,GCGTTGGTGGTATAGTGGTGAGCATAGCTGCCTTCCAAGCAGTTGACCCGGGTTCGATTCCCGGCCAACGCACCA,Gly-TCC,0	-1.18628	0.439435	0.408377	0.769527	1.92638	3.11266	0	13.3375	0	2.82933	3.24651	23.0233
tRF-1:24-Ser-AGA-1-M3	GTAGTCGTGGCCGAGTGGTTAAGG	tRF-5b	5016b	-	24	tRNA-Ser-AGA-1-1,GTAGTCGTGGCCGAGTGGTTAAGGCGATGGACTAGAAATCCATTGGGGTTTCCCCGCGCAGGTTCGAATCCTGCCGACTACGCCA,Ser-AGA,0;tRNA-Ser-AGA-2-1,GTAGTCGTGGCCGAGTGGTTAAGGCGATGGACTAGAAATCCATTGGGGTCTCCCCGCGCAGGTTCGAATCCTGCCGACTACGCCA,Ser-AGA,0;tRNA-Ser-TGA-2-1,GTAGTCGTGGCCGAGTGGTTAAGGCGATGGACTTGAAATCCATTGGGGTTTCCCCGCGCAGGTTCGAATCCTGCCGACTACGCCA,Ser-TGA,0	-1.193	0.437391	0.113872	0.55338	4.55111	5.74411	11.2743	40.0125	32.8319	29.2364	68.1767	30.6977
tRF-1:28-Lys-CTT-2-M2	GCCCGGCTAGCTCAGTCGGTAGAGCATG	tRF-5c	-	-	28	tRNA-Lys-CTT-2-1,GCCCGGCTAGCTCAGTCGGTAGAGCATGGGACTCTTAATCCCAGGGTCGTGGGTTCGAGCCCCACGTTGGGCGCCA,Lys-CTT,0;tRNA-Lys-CTT-3-1,GCCCGGCTAGCTCAGTCGGTAGAGCATGAGACTCTTAATCTCAGGGTCGTGGGTTCGAGCCCCACGTTGGGCGCCA,Lys-CTT,0	-1.20367	0.434168	0.156759	0.603086	9.0481	10.2518	1003.41	360.113	437.759	1230.76	386.335	552.558
tRF-1:16-Tyr-GTA-3-M2	CCTTCGATAGCTCAGC	tRF-5a	-	-	16	tRNA-Tyr-GTA-3-1,CCTTCGATAGCTCAGCTGGTAGAGCGGAGGACTGTAGATCCTTAGGTCGCTGGTTCGATTCCGGCTCGAAGGACCA,Tyr-GTA,0;tRNA-Tyr-GTA-4-1,CCTTCGATAGCTCAGCTGGTAGAGCGGAGGACTGTAGATCCTTAGGTCGCTGGTTCGACTCCGGCTCGAAGGACCA,Tyr-GTA,0	-1.20916	0.432519	0.0327254	0.356981	7.89602	9.10518	101.468	440.138	339.263	217.858	603.851	752.093
tRF-1:30-Lys-TTT-1	GCCCGGATAGCTCAGTCGGTAGAGCATCAG	tRF-5c	-	-	30	tRNA-Lys-TTT-1-1,GCCCGGATAGCTCAGTCGGTAGAGCATCAGACTTTTAATCTGAGGGTCCAGGGTTCAAGTCCCTGTTCGGGCGCCA,Lys-TTT,0	-1.21028	0.432186	0.186149	0.644155	8.85154	10.0618	918.853	380.119	273.599	1132.67	331.144	337.674
tRF-1:29-Gly-CCC-3-M2	GCATTGGTGGTTCAATGGTAGAATTCTCG	tRF-5c	-	-	29	tRNA-Gly-CCC-3-1,GCATTGGTGGTTCAATGGTAGAATTCTCGCCTCCCACGCGGGTGACCCGGGTTCGATTCCCGGCCAATGCACCA,Gly-CCC,0;tRNA-Gly-CCC-4-1,GCATTGGTGGTTCAATGGTAGAATTCTCGCCTCCCACTCGGGTGACCCGGGTTCGATTCCCGGCCAATGCACCA,Gly-CCC,0	-1.2145	0.430924	0.243784	0.673844	6.53173	7.74623	163.477	40.0125	109.44	233.891	84.4093	23.0233
tRF-1:24-Val-AAC-1-M4	GTTTCCGTAGTGTAGTGGTTATCA	tRF-5b	-	-	24	tRNA-Val-AAC-1-1,GTTTCCGTAGTGTAGTGGTTATCACGTTCGCCTAACACGCGAAAGGTCCCCGGTTCGAAACCGGGCGGAAACACCA,Val-AAC,0;tRNA-Val-AAC-5-1,GTTTCCGTAGTGTAGTGGTTATCACATTCGCCTAACACGCGAAAGGTCCCCGGTTCGAAACCGGGCGGAAACACCA,Val-AAC,0;tRNA-Val-CAC-1-1,GTTTCCGTAGTGTAGTGGTTATCACGCTCGCCTCACACGCGAGAGGTCCCCGGTTCGAAACCGGGCGGAAACACCA,Val-CAC,0;tRNA-Val-CAC-2-1,GTTTCCGTAGTGTAGTGGTTATCACGTTCGCCTCACACGCGAAAGGTCCCCGGTTCGAAACCGGGCGGAA…	-1.21485	0.430818	0.120937	0.563019	7.85592	9.07077	405.874	186.725	202.463	513.051	233.749	253.256
tRF-58:75-His-GTG-2-M2	ATCCGAGTCACGGCACCA	tRF-3a	-	-	18	tRNA-His-GTG-2-1,GCCGTGATCGTATAGTGGTTAGTACTCTGCGTTGTGGCCGCAGCAACCTCGGTTCGAATCCGAGTCACGGCACCA,His-GTG,57;tRNA-His-GTG-3-1,GCCGTGATCGTATAGGGGTTAGTACTCTGCGTTGTGGCCGCAGCAACCTCGGTTCGAATCCGAGTCACGGCACCA,His-GTG,57	-1.21563	0.430586	0.163735	0.611676	3.37389	4.58952	11.2743	6.66876	16.416	12.2604	29.2186	15.3488
tRF-58:75-Glu-TTC-1	CTCCCGGTGTGGGAACCA	tRF-3a	3029a	-	18	tRNA-Glu-TTC-1-1,TCCCACATGGTCTAGCGGTTAGGATTCCTGGTTTTCACCCAGGCGGCCCGGGTTCGACTCCCGGTGTGGGAACCA,Glu-TTC,57	-1.22369	0.428186	0.141235	0.578983	3.91296	5.13665	0	20.0063	32.8319	14.1466	38.9581	46.0465
tRF-54:75-Glu-TTC-1	TCGACTCCCGGTGTGGGAACCA	tRF-3b	3029b	-	22	tRNA-Glu-TTC-1-1,TCCCACATGGTCTAGCGGTTAGGATTCCTGGTTTTCACCCAGGCGGCCCGGGTTCGACTCCCGGTGTGGGAACCA,Glu-TTC,53	-1.22705	0.42719	0.118656	0.563019	4.70662	5.93367	5.63714	20.0063	65.6638	15.0897	84.4093	92.093
tRF-58:75-Ala-CGC-4-M6	TTCCCGGCATCTCCACCA	tRF-3a	-	-	18	tRNA-Ala-CGC-4-1,GGGGTTGTAGCTCAGAGGTAGAGCACATGCTTCGCATGTGTGTGGTCCCGGGTTCGATTCCCGGCATCTCCACCA,Ala-CGC,57;tRNA-Ala-CGC-7-1,GGGGATGTAGCTCAGAGGTAGAGCACGTGCTTCGCATGTGTGTGGTCCCGGGGTTCGATTCCCGGCATCTCCACCA,Ala-CGC,58;tRNA-Ala-TGC-5-1,GGGGATGTAGCTCAGCGGTAGAGCACATGCTTTGCATGTATGGGGTCCCGGGTTCGATTCCCGGCATCTCCACCA,Ala-TGC,57;tRNA-Ala-TGC-6-1,GGGGATGTAGCTCAATGGTAGAGCACATGCTTTGCATGTATGAGGCACCGGGTTCGATTCCCGGCATCT…	-1.2349	0.424871	0.0798101	0.526366	4.65467	5.88957	11.2743	53.35	27.3599	23.5777	90.9023	46.0465
tRF-1:28-Lys-TTT-1	GCCCGGATAGCTCAGTCGGTAGAGCATC	tRF-5c	-	-	28	tRNA-Lys-TTT-1-1,GCCCGGATAGCTCAGTCGGTAGAGCATCAGACTTTTAATCTGAGGGTCCAGGGTTCAAGTCCCTGTTCGGGCGCCA,Lys-TTT,0	-1.25011	0.420416	0.115735	0.55754	6.64872	7.89883	112.743	146.713	98.4958	229.175	139.6	61.3954
tRF-1:15-Lys-CTT-2-M2	GCCCGGCTAGCTCAG	tRF-5a	-	-	15	tRNA-Lys-CTT-2-1,GCCCGGCTAGCTCAGTCGGTAGAGCATGGGACTCTTAATCCCAGGGTCGTGGGTTCGAGCCCCACGTTGGGCGCCA,Lys-CTT,0;tRNA-Lys-CTT-3-1,GCCCGGCTAGCTCAGTCGGTAGAGCATGAGACTCTTAATCTCAGGGTCGTGGGTTCGAGCCCCACGTTGGGCGCCA,Lys-CTT,0	-1.25475	0.419065	0.0184046	0.299948	6.98964	8.24439	101.468	193.394	164.16	116.945	340.884	414.419
tRF-1:15-Tyr-GTA-1-M4	CCTTCGATAGCTCAG	tRF-5a	-	-	15	tRNA-Tyr-GTA-1-1,CCTTCGATAGCTCAGTTGGTAGAGCGGAGGACTGTAGATCCTTAGGTCGCTGGTTCGAATCCGGCTCGAAGGACCA,Tyr-GTA,0;tRNA-Tyr-GTA-2-1,CCTTCGATAGCTCAGTTGGTAGAGCGGAGGACTGTAGATCCTTAGGTCGCTGGTTCGATTCCGGCTCGAAGGACCA,Tyr-GTA,0;tRNA-Tyr-GTA-3-1,CCTTCGATAGCTCAGCTGGTAGAGCGGAGGACTGTAGATCCTTAGGTCGCTGGTTCGATTCCGGCTCGAAGGACCA,Tyr-GTA,0;tRNA-Tyr-GTA-4-1,CCTTCGATAGCTCAGCTGGTAGAGCGGAGGACTGTAGATCCTTAGGTCGCTGGTTCGACTCCGGCTCGAA…	-1.26505	0.416085	0.218152	0.656828	3.14397	4.40902	16.9114	6.66876	5.47199	4.71554	42.2046	15.3488
tRF-29:42-Gly-CCC-1	GATTCCCATTCTTG	tRF-2	-	-	14	tRNA-Gly-CCC-1-1,GCGCCGCTGGTGTAGTGGTATCATGCAAGATTCCCATTCTTGCGACCCGGGTTCGATTCCCGGGCGGCGCACCA,Gly-CCC,28	-1.27927	0.412003	0.352703	0.733937	2.45359	3.73287	11.2743	0	5.47199	1.88622	9.73953	38.3721
tRF-1:29-Arg-TCT-2-M3	GGCTCTGTGGCGCAATGGATAGCGCATTG	tRF-5c	-	-	29	tRNA-Arg-TCT-2-1,GGCTCTGTGGCGCAATGGATAGCGCATTGGACTTCTAATTCAAAGGTTGTGGGTTCGAATCCCACCAGAGTCGCCA,Arg-TCT,0;tRNA-Arg-TCT-3-1,GGCTCTGTGGCGCAATGGATAGCGCATTGGACTTCTAATTCAAAGGTTGTGGGTTCGAGTCCCACCAGAGTCGCCA,Arg-TCT,0;tRNA-Arg-TCT-5-1,GGCTCTGTGGCGCAATGGATAGCGCATTGGACTTCTAATTCAAAGGTTGCGGGTTCGAGTCCCGCCAGAGTCGCCA,Arg-TCT,0	-1.28182	0.411277	0.0691195	0.490926	7.1743	8.45612	197.3	180.056	131.328	320.657	175.312	176.512
tRF-1:16-Ala-AGC-10-M3	GGGGGATTAGCTCAAA	tRF-5a	-	-	16	tRNA-Ala-AGC-10-1,GGGGGATTAGCTCAAATGGTAGAGCGCTCGCTTAGCATGCAAGAGGTAGTGGGATCGATGCCCACATCCTCCACCA,Ala-AGC,0;tRNA-Ala-AGC-4-1,GGGGGATTAGCTCAAATGGTAGAGCGCTCGCTTAGCATGCGAGAGGTAGCGGGATCGATGCCCGCATCCTCCACCA,Ala-AGC,0;tRNA-Ala-AGC-5-1,GGGGGATTAGCTCAAATGGTAGAGCGCTCGCTTAGCATGCGAGAGGTAGTGGGATCGATGCCCACATCCTCCACCA,Ala-AGC,0	-1.28965	0.40905	0.109027	0.55338	3.5972	4.88684	16.9114	13.3375	10.944	10.3742	32.4651	46.0465
tRF-1:28-Gly-TCC-1	GCGTTGGTGGTATAGTGGTGAGCATAGC	tRF-5c	-	-	28	tRNA-Gly-TCC-1-1,GCGTTGGTGGTATAGTGGTGAGCATAGCTGCCTTCCAAGCAGTTGACCCGGGTTCGATTCCCGGCCAACGCACCA,Gly-TCC,0	-1.28993	0.408972	0.243509	0.673844	2.82538	4.1153	11.2743	0	10.944	7.54487	6.49302	38.3721
tRF-70:86-Leu-CAA-1-M5	TCCCACTTCTGACACCA	tRF-3a	-	-	17	tRNA-Leu-CAA-1-1,GTCAGGATGGCCGAGTGGTCTAAGGCGCCAGACTCAAGTTCTGGTCTCCCCTGGAGGCGTGGGTTCGAATCCCACTTCTGACACCA,Leu-CAA,69;tRNA-Leu-CAA-2-1,GTCAGGATGGCCGAGTGGTCTAAGGCGCCAGACTCAAGTTCTGGTCTCCGTATGGAGGCGTGGGTTCGAATCCCACTTCTGACACCA,Leu-CAA,70;tRNA-Leu-CAA-3-1,GTCAGGATGGCCGAGTGGTCTAAGGCGCCAGACTCAAGTTCTGGTCTCCGAATGGAGGCGTGGGTTCGAATCCCACTTCTGACACCA,Leu-CAA,70;tRNA-Leu-CAA-4-1,GTCAGGATGGCCGAGTGGTCTAAGGCGCCAGACTC…	-1.30203	0.405556	0.022151	0.334437	6.14977	7.4518	67.6456	73.3563	109.44	56.5865	227.256	237.907
tRF-1:31-Val-AAC-5	GTTTCCGTAGTGTAGTGGTTATCACATTCGC	tRF-5c	-	-	31	tRNA-Val-AAC-5-1,GTTTCCGTAGTGTAGTGGTTATCACATTCGCCTAACACGCGAAAGGTCCCCGGTTCGAAACCGGGCGGAAACACCA,Val-AAC,0	-1.30489	0.404752	0.0236043	0.334437	5.73608	7.04097	50.7342	73.3563	65.6638	72.6194	123.367	138.14
tRF-1:30-Thr-TGT-3	GGCTCCATAGCTCAGGGGTTAGAGCACTGG	tRF-5c	-	-	30	tRNA-Thr-TGT-3-1,GGCTCCATAGCTCAGGGGTTAGAGCACTGGTCTTGTAAACCAGGGGTCGCGAGTTCAAATCTCGCTGGGGCCTCCA,Thr-TGT,0	-1.31148	0.402907	0.137345	0.578983	7.31242	8.6239	298.768	153.381	93.0238	397.049	103.888	199.535
tRF-59:75-Cys-GCA-1-M12	TCCAGGTGCCCCCTCCA	tRF-3a	-	-	17	tRNA-Cys-GCA-1-1,GGGGGTATAGCTCAGTGGTAGAGCATTTGACTGCAGATCAAGAGGTCCCTGGTTCAAATCCAGGTGCCCCCTCCA,Cys-GCA,58;tRNA-Cys-GCA-11-1,GGGGGTATAGCTCAGGGGTAGAGTATTTGGCTGCAGATCAAGAGGTCCCTGGTTCAAATCCAGGTGCCCCCTCCA,Cys-GCA,58;tRNA-Cys-GCA-13-1,GGGGGTATAGCTCAGAGGTAGAGCATTTGACTGCAGATCAAGAGATCTCTGGTTCAAATCCAGGTGCCCCCTCCA,Cys-GCA,58;tRNA-Cys-GCA-14-1,GGGGGTATAGCTCAGGGGTAGAGCATTTGACTGCAGATCAAGAGGTCCCTAGTTCAAATCCAGGTGC…	-1.32641	0.398759	0.0179771	0.299948	6.15746	7.48387	62.0085	106.7	87.5518	56.5865	240.242	237.907
tRF-1:32-Val-CAC-4	GTTTCTGTAGTGTAGTGGTTATCACGTTCGCC	tRF-5c	-	-	32	tRNA-Val-CAC-4-1,GTTTCTGTAGTGTAGTGGTTATCACGTTCGCCTCACACGCGAAAGGTCCCCGGTTCGAAACCGGGCAGAAACACCA,Val-CAC,0	-1.32934	0.39795	0.476965	0.846918	1.92621	3.25556	0	13.3375	0	3.77244	3.24651	23.0233
tRF-1:29-Glu-TTC-2	TCCCATATGGTCTAGCGGTTAGGATTCCT	tRF-5c	-	-	29	tRNA-Glu-TTC-2-1,TCCCATATGGTCTAGCGGTTAGGATTCCTGGTTTTCACCCAGGCGGCCCGGGTTCGACTCCCGGTATGGGAACCA,Glu-TTC,0	-1.34311	0.394171	0.0948942	0.536443	10.0265	11.3696	1837.71	773.576	963.07	2594.49	1120.05	1120.47
tRF-59:76-Ala-AGC-6-M2	TGCCCGCATTCTCCACCA	tRF-3a	-	-	18	tRNA-Ala-AGC-6-1,GGGGAATTAGCTCAAATGGTAGAGCGCTCGCTTAGCATGCGAGAGGTAGCGGGATCGATGCCCGCATTCTCCACCA,Ala-AGC,58;tRNA-Ala-AGC-7-1,GGGGAATTAGCTCAAATGGTAGAGCGCTCGCTTAGCATGTGAGAGGTAGCGGGATCGATGCCCGCATTCTCCACCA,Ala-AGC,58	-1.35027	0.39222	0.102889	0.553325	3.5979	4.94817	16.9114	13.3375	10.944	10.3742	25.9721	61.3954
tRF-58:75-Ala-AGC-2-M2	TCCCCGGCACCTCCACCA	tRF-3a	3036a	-	18	tRNA-Ala-AGC-2-1,GGGGGTGTAGCTCAGTGGTAGAGCGCGTGCTTAGCATGCACGAGGCCCCGGGTTCAATCCCCGGCACCTCCACCA,Ala-AGC,57;tRNA-Ala-TGC-1-1,GGGGGTGTAGCTCAGTGGTAGAGCGCATGCTTTGCATGCATGAGGCCCCGGGTTCGATCCCCGGCACCTCCACCA,Ala-TGC,57	-1.37019	0.38684	0.0105568	0.257435	10.7631	12.1333	1336	2907.58	2095.77	1431.64	5207.4	6814.89
tRF-1:31-Val-TAC-1	GGTTCCATAGTGTAGCGGTTATCACGTCTGC	tRF-5c	-	-	31	tRNA-Val-TAC-1-1,GGTTCCATAGTGTAGCGGTTATCACGTCTGCTTTACACGCAGAAGGTCCTGGGTTCGAGCCCCAGTGGAACCACCA,Val-TAC,0	-1.37556	0.385402	0.0515385	0.432611	4.56795	5.94351	33.8228	20.0063	27.3599	34.895	32.4651	92.093
tRF-1:30-Arg-TCT-2-M3	GGCTCTGTGGCGCAATGGATAGCGCATTGG	tRF-5c	-	-	30	tRNA-Arg-TCT-2-1,GGCTCTGTGGCGCAATGGATAGCGCATTGGACTTCTAATTCAAAGGTTGTGGGTTCGAATCCCACCAGAGTCGCCA,Arg-TCT,0;tRNA-Arg-TCT-3-1,GGCTCTGTGGCGCAATGGATAGCGCATTGGACTTCTAATTCAAAGGTTGTGGGTTCGAGTCCCACCAGAGTCGCCA,Arg-TCT,0;tRNA-Arg-TCT-5-1,GGCTCTGTGGCGCAATGGATAGCGCATTGGACTTCTAATTCAAAGGTTGCGGGTTCGAGTCCCGCCAGAGTCGCCA,Arg-TCT,0	-1.3781	0.384725	0.283539	0.687555	3.79321	5.17131	28.1857	0	16.416	37.7244	9.73953	7.67442
tRF-55:76-Thr-TGT-2-M2	TCAAATCTCGCTGGGGCCTCCA	tRF-3b	3005b	-	22	tRNA-Thr-TGT-2-1,GGCCCTATAGCTCAGGGGTTAGAGCACTGGTCTTGTAAACCAGGGGTCGCGAGTTCAAATCTCGCTGGGGCCTCCA,Thr-TGT,54;tRNA-Thr-TGT-3-1,GGCTCCATAGCTCAGGGGTTAGAGCACTGGTCTTGTAAACCAGGGGTCGCGAGTTCAAATCTCGCTGGGGCCTCCA,Thr-TGT,54	-1.38976	0.381629	0.23377	0.670905	2.82961	4.21936	5.63714	13.3375	5.47199	4.71554	38.9581	7.67442
tRF-1:15-Gly-GCC-2-M3	GCATTGGTGGTTCAG	tRF-5a	-	-	15	tRNA-Gly-GCC-2-1,GCATTGGTGGTTCAGTGGTAGAATTCTCGCCTGCCACGCGGGAGGCCCGGGTTCGATTCCCGGCCAATGCACCA,Gly-GCC,0;tRNA-Gly-GCC-3-1,GCATTGGTGGTTCAGTGGTAGAATTCTCGCCTGCCACGCGGGAGGCCCGGGTTTGATTCCCGGCCAATGCACCA,Gly-GCC,0;tRNA-Gly-GCC-4-1,GCATTGGTGGTTCAGTGGTAGAATTCTCGCCTGCCACGCGGGAGGCCCGGGTTCGGTTCCCGGCCAATGCACCA,Gly-GCC,0	-1.40116	0.378624	0.0241471	0.334437	6.16572	7.56688	39.46	86.6938	131.328	103.742	116.874	276.279
tRF-1:31-Ala-CGC-5	TCCCTGGTAGTCTAGTGGTTAGGATTCGGTG	tRF-5c	-	-	31	tRNA-Ala-CGC-5-1,TCCCTGGTAGTCTAGTGGTTAGGATTCGGTGCTCGCACCGCCGTGGCCCAGGTTTGAATCCTAGTCAGGGAACCA,Ala-CGC,0	-1.40575	0.377422	0.091561	0.536443	4.66532	6.07107	39.46	13.3375	32.8319	60.359	25.9721	38.3721
tRF-59:75-Ala-AGC-3	CCCCAGCATCTCCACCA	tRF-3a	-	-	17	tRNA-Ala-AGC-3-1,GGGGATGTAGCTCAGTGGTAGAGCGCATGCTTAGCATGCATGAGGTCCTGGGTTCGATCCCCAGCATCTCCACCA,Ala-AGC,58	-1.41041	0.376205	0.100212	0.544289	3.75354	5.16395	0	20.0063	27.3599	14.1466	35.7116	53.7209
tRF-1:30-Gln-CTG-1-M3	GGTTCCATGGTGTAATGGTTAGCACTCTGG	tRF-5c	-	-	30	tRNA-Gln-CTG-1-1,GGTTCCATGGTGTAATGGTTAGCACTCTGGACTCTGAATCCAGCGACCCGAGTTCAAATCTCGGTGGGACCTCCA,Gln-CTG,0;tRNA-Gln-CTG-2-1,GGTTCCATGGTGTAATGGTTAGCACTCTGGACTCTGAATCCAGCGATCCGAGTTCAAATCTCGGTGGAACCTCCA,Gln-CTG,0;tRNA-Gln-CTG-3-1,GGTTCCATGGTGTAATGGTTAGCACTCTGGACTCTGAATCCAGCGATCCGAGTTCAAATCTCGGTGGGACCTCCA,Gln-CTG,0	-1.42583	0.372205	0.0111524	0.257435	6.30862	7.73445	78.9199	80.0251	120.384	108.458	233.749	214.884
tRF-1:28-Gly-CCC-3-M2	GCATTGGTGGTTCAATGGTAGAATTCTC	tRF-5c	-	-	28	tRNA-Gly-CCC-3-1,GCATTGGTGGTTCAATGGTAGAATTCTCGCCTCCCACGCGGGTGACCCGGGTTCGATTCCCGGCCAATGCACCA,Gly-CCC,0;tRNA-Gly-CCC-4-1,GCATTGGTGGTTCAATGGTAGAATTCTCGCCTCCCACTCGGGTGACCCGGGTTCGATTCCCGGCCAATGCACCA,Gly-CCC,0	-1.43206	0.370602	0.0854068	0.536443	5.84403	7.27608	90.1942	53.35	54.7199	149.011	74.6697	53.7209
tRF-1:14-His-GTG-2-M2	GCCGTGATCGTATA	tRF-5a	-	-	14	tRNA-His-GTG-2-1,GCCGTGATCGTATAGTGGTTAGTACTCTGCGTTGTGGCCGCAGCAACCTCGGTTCGAATCCGAGTCACGGCACCA,His-GTG,0;tRNA-His-GTG-3-1,GCCGTGATCGTATAGGGGTTAGTACTCTGCGTTGTGGCCGCAGCAACCTCGGTTCGAATCCGAGTCACGGCACCA,His-GTG,0	-1.45739	0.364151	0.0513348	0.432611	3.93504	5.39244	11.2743	20.0063	21.8879	22.6346	42.2046	38.3721
tRF-54:72-Ala-CGC-1-M2	TCGATCCCCGGCATCTCCA	tRF-3b	-	-	19	tRNA-Ala-CGC-1-1,GGGGATGTAGCTCAGTGGTAGAGCGCATGCTTCGCATGTATGAGGCCCCGGGTTCGATCCCCGGCATCTCCACCA,Ala-CGC,53;tRNA-Ala-TGC-2-1,GGGGATGTAGCTCAGTGGTAGAGCGCATGCTTTGCATGTATGAGGCCCCGGGTTCGATCCCCGGCATCTCCACCA,Ala-TGC,53	-1.46536	0.362144	0.286298	0.687555	2.77618	4.24154	0	0	21.8879	4.71554	6.49302	53.7209
tRF-30:44-Asn-GTT-1-M3	CGGCTGTTAACCGAA	tRF-2	-	-	15	tRNA-Asn-GTT-1-1,GTCTCCGTGGCGCAATCGGTCAGCGCGTTCGGCTGTTAACCGAAAGGTTGGTGGTTCGAGCCCACCCGGGGACGCCA,Asn-GTT,29;tRNA-Asn-GTT-2-1,GTCTCTGTGGCGCAATTGGTTAGCGCGTTCGGCTGTTAACCGAAAGGTTGGTGGTTCAAGCCCACCCAGGGACGCCA,Asn-GTT,29;tRNA-Asn-GTT-3-1,GTCTCTGTGGCGCAATCGGTTAGCGCGTTCGGCTGTTAACCGAAAGGTTGGTGGTTCGAGCCCACCCAGGGACGCCA,Asn-GTT,29	-1.47825	0.358923	0.169792	0.622555	2.82404	4.3023	0	20.0063	5.47199	7.54487	29.2186	15.3488
tRF-1:24-Cys-GCA-1-M3	GGGGGTATAGCTCAGTGGTAGAGC	tRF-5b	5012b	-	24	tRNA-Cys-GCA-1-1,GGGGGTATAGCTCAGTGGTAGAGCATTTGACTGCAGATCAAGAGGTCCCTGGTTCAAATCCAGGTGCCCCCTCCA,Cys-GCA,0;tRNA-Cys-GCA-2-1,GGGGGTATAGCTCAGTGGTAGAGCATTTGACTGCAGATCAAGAGGTCCCTGGTTCAAATCCGGGTGCCCCCTCCA,Cys-GCA,0;tRNA-Cys-GCA-3-1,GGGGGTATAGCTCAGTGGTAGAGCATTTGACTGCAGATCAAGAGGTCCCCGGTTCAAATCCGGGTGCCCCCTCCA,Cys-GCA,0	-1.50987	0.351144	0.0334034	0.356981	3.93824	5.4481	16.9114	13.3375	21.8879	20.7484	42.2046	53.7209
tRF-1:15-SeC-TCA-1	GCCCGGATGATCCTC	tRF-5a	-	-	15	tRNA-SeC-TCA-1-1,GCCCGGATGATCCTCAGTGGTCTGGGGTGCAGGCTTCAAACCTGTAGCTGTTTAGCGACAGAGTGGTTCAATTCCACCTTTCGGGCGCCA,SeC-TCA,0	-1.51482	0.34994	0.0570457	0.454698	4.79435	6.30917	5.63714	26.675	65.6638	54.7003	74.6697	46.0465
tRF-1:28-Val-AAC-1-M2	GTTTCCGTAGTGTAGTGGTTATCACGTT	tRF-5c	-	-	28	tRNA-Val-AAC-1-1,GTTTCCGTAGTGTAGTGGTTATCACGTTCGCCTAACACGCGAAAGGTCCCCGGTTCGAAACCGGGCGGAAACACCA,Val-AAC,0;tRNA-Val-CAC-2-1,GTTTCCGTAGTGTAGTGGTTATCACGTTCGCCTCACACGCGAAAGGTCCCCGGTTCGAAACCGGGCGGAAACACCA,Val-CAC,0	-1.53073	0.346103	0.152238	0.602807	3.60717	5.1379	22.5485	6.66876	10.944	32.0657	19.4791	7.67442
tRF-1:29-Lys-TTT-1	GCCCGGATAGCTCAGTCGGTAGAGCATCA	tRF-5c	-	-	29	tRNA-Lys-TTT-1-1,GCCCGGATAGCTCAGTCGGTAGAGCATCAGACTTTTAATCTGAGGGTCCAGGGTTCAAGTCCCTGTTCGGGCGCCA,Lys-TTT,0	-1.53962	0.343977	0.0960814	0.537668	5.21161	6.75123	62.0085	13.3375	49.2479	103.742	35.7116	53.7209
tRF-30:43-Gln-CTG-1-M5	GACTCTGAATCCAG	tRF-2	-	-	14	tRNA-Gln-CTG-1-1,GGTTCCATGGTGTAATGGTTAGCACTCTGGACTCTGAATCCAGCGACCCGAGTTCAAATCTCGGTGGGACCTCCA,Gln-CTG,29;tRNA-Gln-CTG-2-1,GGTTCCATGGTGTAATGGTTAGCACTCTGGACTCTGAATCCAGCGATCCGAGTTCAAATCTCGGTGGAACCTCCA,Gln-CTG,29;tRNA-Gln-CTG-3-1,GGTTCCATGGTGTAATGGTTAGCACTCTGGACTCTGAATCCAGCGATCCGAGTTCAAATCTCGGTGGGACCTCCA,Gln-CTG,29;tRNA-Gln-CTG-4-1,GGTTCCATGGTGTAATGGTGAGCACTCTGGACTCTGAATCCAGCGATCCGAGTTCAAATCTCGGTGGGAC…	-1.5511	0.341251	0.0210491	0.333177	14.4721	16.0232	31748.4	22480.4	25313.4	58216.2	34653.3	41656.8
tRF-61:77-Thr-AGT-1-M2	TCCCAGCGGTGCCTCCA	tRF-3a	-	-	17	tRNA-Thr-AGT-1-1,GGCGCCGTGGCTTAGTTGGTTAAAGCGCCTGTCTAGTAAACAGGAGATCCTGGGTTCGAATCCCAGCGGTGCCTCCA,Thr-AGT,60;tRNA-Thr-AGT-3-1,GGCGCCGTGGCTTAGCTGGTTAAAGCGCCTGTCTAGTAAACAGGAGATCCTGGGTTCGAATCCCAGCGGTGCCTCCA,Thr-AGT,60	-1.55787	0.339653	0.128655	0.570198	3.38491	4.94277	5.63714	26.675	5.47199	11.3173	9.73953	76.7442
tRF-1:30-Gln-TTG-1-M2	GGTCCCATGGTGTAATGGTTAGCACTCTGG	tRF-5c		-	30	tRNA-Gln-TTG-1-1,GGTCCCATGGTGTAATGGTTAGCACTCTGGACTTTGAATCCAGCGATCCGAGTTCAAATCTCGGTGGGACCTCCA,Gln-TTG,0;tRNA-Gln-TTG-2-1,GGTCCCATGGTGTAATGGTTAGCACTCTGGACTTTGAATCCAGCAATCTGAGTTCAAATCTCGGTGGGACCTCCA,Gln-TTG,0	-1.57503	0.335636	0.0296867	0.356981	4.24097	5.816	33.8228	20.0063	10.944	27.3502	64.9302	53.7209
tRF-1:15-Gln-CTG-1-M5	GGTTCCATGGTGTAA	tRF-5a	-	-	15	tRNA-Gln-CTG-1-1,GGTTCCATGGTGTAATGGTTAGCACTCTGGACTCTGAATCCAGCGACCCGAGTTCAAATCTCGGTGGGACCTCCA,Gln-CTG,0;tRNA-Gln-CTG-2-1,GGTTCCATGGTGTAATGGTTAGCACTCTGGACTCTGAATCCAGCGATCCGAGTTCAAATCTCGGTGGAACCTCCA,Gln-CTG,0;tRNA-Gln-CTG-3-1,GGTTCCATGGTGTAATGGTTAGCACTCTGGACTCTGAATCCAGCGATCCGAGTTCAAATCTCGGTGGGACCTCCA,Gln-CTG,0;tRNA-Gln-CTG-4-1,GGTTCCATGGTGTAATGGTGAGCACTCTGGACTCTGAATCCAGCGATCCGAGTTCAAATCTCGGTGGGACCTC…	-1.57661	0.335269	0.0827236	0.532894	3.37397	4.95058	11.2743	6.66876	16.416	16.976	22.7256	38.3721
tRF-58:75-Ala-CGC-3	CTCCCGGCATCTCCACCA	tRF-3a	-	-	18	tRNA-Ala-CGC-3-1,GGGGATGTAGCTCAGAGGTAGAGCACATGCTTCGCATGTGTGTGGTCCCGGGTTCGACTCCCGGCATCTCCACCA,Ala-CGC,57	-1.58869	0.332472	0.187752	0.644155	2.43869	4.02739	0	13.3375	5.47199	3.77244	29.2186	15.3488
tRF-56:75-Gly-TCC-1	GATTCCCGGCCAACGCACCA	tRF-3b	-	-	20	tRNA-Gly-TCC-1-1,GCGTTGGTGGTATAGTGGTGAGCATAGCTGCCTTCCAAGCAGTTGACCCGGGTTCGATTCCCGGCCAACGCACCA,Gly-TCC,55	-1.59442	0.331155	0.170809	0.622555	1.91072	3.50514	0	6.66876	5.47199	0	19.4791	23.0233
tRF-1:32-Val-CAC-1	GTTTCCGTAGTGTAGTGGTTATCACGCTCGCC	tRF-5c	-	-	32	tRNA-Val-CAC-1-1,GTTTCCGTAGTGTAGTGGTTATCACGCTCGCCTCACACGCGAGAGGTCCCCGGTTCGAAACCGGGCGGAAACACCA,Val-CAC,0	-1.59628	0.330728	0.00801589	0.257435	5.20298	6.79927	45.0971	33.3438	49.2479	39.6106	139.6	145.814
tRF-58:75-Ala-AGC-3	TCCCCAGCATCTCCACCA	tRF-3a	-	-	18	tRNA-Ala-AGC-3-1,GGGGATGTAGCTCAGTGGTAGAGCGCATGCTTAGCATGCATGAGGTCCTGGGTTCGATCCCCAGCATCTCCACCA,Ala-AGC,57	-1.61397	0.326699	0.00250789	0.133625	8.92498	10.5389	372.051	960.301	454.175	510.222	1681.69	2202.56
tRF-1:29-Val-AAC-1-M2	GTTTCCGTAGTGTAGTGGTTATCACGTTC	tRF-5c	-	-	29	tRNA-Val-AAC-1-1,GTTTCCGTAGTGTAGTGGTTATCACGTTCGCCTAACACGCGAAAGGTCCCCGGTTCGAAACCGGGCGGAAACACCA,Val-AAC,0;tRNA-Val-CAC-2-1,GTTTCCGTAGTGTAGTGGTTATCACGTTCGCCTCACACGCGAAAGGTCCCCGGTTCGAAACCGGGCGGAAACACCA,Val-CAC,0	-1.61689	0.326038	0.0643252	0.466316	11.3867	13.0036	5028.33	1760.55	2325.59	8534.19	2623.18	3054.42
tRF-69:85-Leu-AAG-1-M4	TCCCACCGCTGCCACCA	tRF-3a	-	-	17	tRNA-Leu-AAG-1-1,GGTAGCGTGGCCGAGCGGTCTAAGGCGCTGGATTAAGGCTCCAGTCTCTTCGGGGGCGTGGGTTCGAATCCCACCGCTGCCACCA,Leu-AAG,68;tRNA-Leu-AAG-2-1,GGTAGTGTGGCCGAGCGGTCTAAGGCGCTGGATTAAGGCTCCAGTCTCTTCGGGGGCGTGGGTTCGAATCCCACCGCTGCCACCA,Leu-AAG,68;tRNA-Leu-TAG-1-1,GGTAGCGTGGCCGAGCGGTCTAAGGCGCTGGATTTAGGCTCCAGTCTCTTCGGAGGCGTGGGTTCGAATCCCACCGCTGCCACCA,Leu-TAG,68;tRNA-Leu-TAG-3-1,GGTAGCGTGGCCGAGTGGTCTAAGGCGCTGGATTTAGGCT…	-1.61829	0.325722	0.00482452	0.205599	8.35887	9.97716	135.291	646.869	437.759	354.609	1347.3	1235.58
tRF-+1:T14-Ser-AGA-2	GAAGGGAATGTTTT	tRF-1	1023	-	14	pre_tRNA-Ser-AGA-2-1,GAGTCTACATAGAATCTTCCTGCCAAAATTAGCATCACCAGTAGTCGTGGCCGAGTGGTTAAGGCGATGGACTAGAAATCCATTGGGGTCTCCCCGCGCAGGTTCGAATCCTGCCGACTACGGAAGGGAATGTTTTTTGCCACCGAATGAATAATTTTGGAT,Ser-AGA,122	-1.61862	0.325648	1	1	-1.06456	0.554054	0	0	0	0.943109	0	0
tRF-+1:T14-Asn-GTT-3-7	GCAGCGTTCCTTTT	tRF-1	-	-	14	pre_tRNA-Asn-GTT-3-7,CGGCAATGTGTACAAAGCGCACGGCCGCTCAGGCAGCTGTGTCTCTGTGGCGCAATCGGTTAGCGCGTTCGGCTGTTAACCGAAAGGTTGGTGGTTCGAGCCCACCCAGGGACGGCAGCGTTCCTTTTAGCAAAAAACATTTTTAGAAATGTTT,Asn-GTT,114	-1.61862	0.325648	1	1	-1.06456	0.554054	0	0	0	0.943109	0	0
tRF-+1:T16-Ile-AAT-1-2	GTGTGCTTATCTTTTT	tRF-1	-	-	16	pre_tRNA-Ile-AAT-1-2,TTTATTTACATGACTTTAGAGCTCCCACTCTCTCGTCTCTGGCCGGTTAGCTCAGTTGGTTAGAGCGTGGTGCTAATAACGCCAAGGTCGCGGGTTCGATCCCCGTACGGGCCAGTGTGCTTATCTTTTTAAACAAAAGCAATTGTTCAATATT,Ile-AAT,114	-1.61862	0.325648	1	1	-1.06456	0.554054	0	0	0	0.943109	0	0
tRF-1:24-Val-AAC-4-M2	GTTTCTGTAGTGTAGTGGTTATCA	tRF-5b	-	-	24	tRNA-Val-AAC-4-1,GTTTCTGTAGTGTAGTGGTTATCACGCTCGCCTAACACGCGAGAGGTCCCCGGTTCGAAACCGGGCAGAAACACCA,Val-AAC,0;tRNA-Val-CAC-4-1,GTTTCTGTAGTGTAGTGGTTATCACGTTCGCCTCACACGCGAAAGGTCCCCGGTTCGAAACCGGGCAGAAACACCA,Val-CAC,0	-1.61862	0.325648	1	1	-1.06456	0.554054	0	0	0	0.943109	0	0
tRF-+1:T25-Val-TAC-1-3	TAGCTGCAAAGCCAGCTGACATTTT	tRF-1	1028	-	25	pre_tRNA-Val-TAC-1-3,CACTCTCAAAAGGCCGAATAGTCATACCACCCTTCGTGGTGGTTCCATAGTGTAGCGGTTATCACGTCTGCTTTACACGCAGAAGGTCCTGGGTTCGAGCCCCAGTGGAACCATAGCTGCAAAGCCAGCTGACATTTTTTCCCCAAAAGTATC,Val-TAC,113	-1.61862	0.325648	1	1	-1.06456	0.554054	0	0	0	0.943109	0	0
tRF-+1:T14-Ser-AGA-2-3	TCATGGTCTGTTTT	tRF-1	-	-	14	pre_tRNA-Ser-AGA-2-3,AAGTCCCTTACTTTAGAGAGAAAGGCATAAAGTTCCAGCTGTAGTCGTGGCCGAGTGGTTAAGGCGATGGACTAGAAATCCATTGGGGTCTCCCCGCGCAGGTTCGAATCCTGCCGACTACGTCATGGTCTGTTTTAGTCTAGGTGTAATGCCAGGTGGGTA,Ser-AGA,122	-1.61862	0.325648	1	1	-1.06456	0.554054	0	0	0	0.943109	0	0
tRF-+1:T17-Thr-AGT-1-3	TTGTGGTTTCTTATTTT	tRF-1	-	-	17	pre_tRNA-Thr-AGT-1-3,TTGACCTGGCCAAGTAGTGAAGGCCTTGCAACGTCACGTAGGCGCCGTGGCTTAGTTGGTTAAAGCGCCTGTCTAGTAAACAGGAGATCCTGGGTTCGAATCCCAGCGGTGCCTTTGTGGTTTCTTATTTTACGGAAAATAGAAAAGTAATGAC,Thr-AGT,114	-1.61862	0.325648	1	1	-1.06456	0.554054	0	0	0	0.943109	0	0
tRF-+1:T19-Ala-CGC-2	AGCAGCCGGAATTCTGTTT	tRF-1	-	-	19	pre_tRNA-Ala-CGC-2-1,TTTGTATAAGTAGGCATATGAAGAGAGCAGTTAGCGGCTGGGGGATGTAGCTCAGTGGTAGAGCGCGCGCTTCGCATGTGTGAGGTCCCGGGTTCAATCCCCGGCATCTCCAAGCAGCCGGAATTCTGTTTTTCATTCTTTCTCAAAGAAAA,Ala-CGC,112	-1.61862	0.325648	1	1	-1.06456	0.554054	0	0	0	0.943109	0	0
tRF-+1:T16-Asp-GTC-1-6	ATTGTTAAGAATTTTT	tRF-1	-	-	16	pre_tRNA-Asp-GTC-1-6,TCTTAAAGGAGCTTCTTGCCAAACTGTGGCTCAGCTCTCTTCCTCGTTAGTATAGTGGTGAGTATCCCCGCCTGTCACGCGGGAGACCGGGGTTCGATTCCCCGACGGGGAGATTGTTAAGAATTTTTTTTTTTTTTTTTTGGTCACCAACT,Asp-GTC,112	-1.67194	0.313832	1	1	-1.06456	0.607375	0	0	0	0	3.24651	0
tRF-54:74-Gly-CCC-2-M4	CGATTCCCGGCCAATGCACCA	tRF-3b	-	-	21	tRNA-Gly-CCC-2-1,GCATTGGTAGTTCAATGGTAGAATTCTCGCCTCCCACGCGGGTGACCCGGGTTCGATTCCCGGCCAATGCACCA,Gly-CCC,53;tRNA-Gly-CCC-3-1,GCATTGGTGGTTCAATGGTAGAATTCTCGCCTCCCACGCGGGTGACCCGGGTTCGATTCCCGGCCAATGCACCA,Gly-CCC,53;tRNA-Gly-CCC-4-1,GCATTGGTGGTTCAATGGTAGAATTCTCGCCTCCCACTCGGGTGACCCGGGTTCGATTCCCGGCCAATGCACCA,Gly-CCC,53;tRNA-Gly-GCC-2-1,GCATTGGTGGTTCAGTGGTAGAATTCTCGCCTGCCACGCGGGAGGCCCGGGTTCGATTCCCGGCCAATGCACC…	-1.67194	0.313832	1	1	-1.06456	0.607375	0	0	0	0	3.24651	0
tRF-1:22-Gly-TCC-1	GCGTTGGTGGTATAGTGGTGAG	tRF-5b	-	-	22	tRNA-Gly-TCC-1-1,GCGTTGGTGGTATAGTGGTGAGCATAGCTGCCTTCCAAGCAGTTGACCCGGGTTCGATTCCCGGCCAACGCACCA,Gly-TCC,0	-1.67194	0.313832	1	1	-1.06456	0.607375	0	0	0	0	3.24651	0
tRF-1:15-Leu-AAG-2-M3	GGTAGTGTGGCCGAG	tRF-5a	-	-	15	tRNA-Leu-AAG-2-1,GGTAGTGTGGCCGAGCGGTCTAAGGCGCTGGATTAAGGCTCCAGTCTCTTCGGGGGCGTGGGTTCGAATCCCACCGCTGCCACCA,Leu-AAG,0;tRNA-Leu-AAG-3-1,GGTAGTGTGGCCGAGCGGTCTAAGGCGCTGGATTAAGGCTCCAGTCTCTTCGGGGGCGTGGGTTCGAATCCCACCACTGCCACCA,Leu-AAG,0;tRNA-Leu-TAG-2-1,GGTAGTGTGGCCGAGCGGTCTAAGGCGCTGGATTTAGGCTCCAGTCTCTTCGGAGGCGTGGGTTCGAATCCCACCACTGCCACCA,Leu-TAG,0	-1.67194	0.313832	1	1	-1.06456	0.607375	0	0	0	0	3.24651	0
tRF-+1:T14-iMet-CAT-1-7	TCTGGACTTTTTTT	tRF-1	-	-	14	pre_tRNA-iMet-CAT-1-7,ATAAAGTTAAGTATAATATTTTGAAAGGCTCTCTTTAAGTAGCAGAGTGGCGCAGCGGAAGCGTGCTGGGCCCATAACCCAGAGGTCGATGGATCGAAACCATCCTCTGCTATCTGGACTTTTTTTTTTCTTTTTTCCCTCCTCCTAAAGTT,iMet-CAT,112	-1.67194	0.313832	1	1	-1.06456	0.607375	0	0	0	0	3.24651	0
tRF-+1:T15-Cys-GCA-3-3	AGCAGGCTCACTCTT	tRF-1	-	-	15	pre_tRNA-Cys-GCA-3-3,ACTAGCACCAAGTAGTAACTGACGCAAAGCTACCGGCAGAGGGGGTATAGCTCAGTGGTAGAGCATTTGACTGCAGATCAAGAGGTCCCCGGTTCAAATCCGGGTGCCCCCTAGCAGGCTCACTCTTTTCTTTGGAAGACCTTATTACGTCC,Cys-GCA,112	-1.67194	0.313832	1	1	-1.06456	0.607375	0	0	0	0	3.24651	0
tRF-59:76-Arg-TCT-3	GTCCCACCAGAGTCGCCA	tRF-3a	3034a	-	18	tRNA-Arg-TCT-3-1,GGCTCTGTGGCGCAATGGATAGCGCATTGGACTTCTAATTCAAAGGTTGTGGGTTCGAGTCCCACCAGAGTCGCCA,Arg-TCT,58	-1.68577	0.310837	0.194933	0.644155	2.43843	4.12419	0	13.3375	5.47199	5.65865	32.4651	7.67442
tRF-58:74-Gly-CCC-1	TCCCGGGCGGCGCACCA	tRF-3a	-	-	17	tRNA-Gly-CCC-1-1,GCGCCGCTGGTGTAGTGGTATCATGCAAGATTCCCATTCTTGCGACCCGGGTTCGATTCCCGGGCGGCGCACCA,Gly-CCC,57	-1.69712	0.308402	0.0312847	0.356981	7.82305	9.52016	338.228	220.069	229.823	724.308	295.432	306.977
tRF-30:43-Gln-TTG-1-M4	GACTTTGAATCCAG	tRF-2	-	-	14	tRNA-Gln-TTG-1-1,GGTCCCATGGTGTAATGGTTAGCACTCTGGACTTTGAATCCAGCGATCCGAGTTCAAATCTCGGTGGGACCTCCA,Gln-TTG,29;tRNA-Gln-TTG-2-1,GGTCCCATGGTGTAATGGTTAGCACTCTGGACTTTGAATCCAGCAATCTGAGTTCAAATCTCGGTGGGACCTCCA,Gln-TTG,29;tRNA-Gln-TTG-3-1,GGCCCCATGGTGTAATGGTTAGCACTCTGGACTTTGAATCCAGCGATCCGAGTTCAAATCTCGGTGGGACCTCCA,Gln-TTG,29;tRNA-Gln-TTG-5-1,GGACCCATGGTGTAATGGTTAGCACTCTGGACTTTGAATCCAGCAATCCAAGTTCAAATCTCGGTGGGAC…	-1.70658	0.306386	0.0432646	0.406248	5.98484	7.69141	129.654	40.0125	43.7759	191.451	90.9023	107.442
tRF-1:29-Gly-ACC-1	GTTTCCGTAGTGTAGTGGTTAGCGCGTTC	tRF-5c	-	-	29	tRNA-Gly-ACC-1-1,GTTTCCGTAGTGTAGTGGTTAGCGCGTTCGCCTACCAAAGCGAAAGGTCCCCGGTTCGAAACCGGGCGGAAACACCA,Gly-ACC,0	-1.73944	0.299486	0.321051	0.708615	1.94864	3.68808	11.2743	0	0	9.43109	12.986	0
tRF-59:75-Cys-GCA-2-M4	TCCGGGTGCCCCCTCCA	tRF-3a	3004a	-	17	tRNA-Cys-GCA-2-1,GGGGGTATAGCTCAGTGGTAGAGCATTTGACTGCAGATCAAGAGGTCCCTGGTTCAAATCCGGGTGCCCCCTCCA,Cys-GCA,58;tRNA-Cys-GCA-3-1,GGGGGTATAGCTCAGTGGTAGAGCATTTGACTGCAGATCAAGAGGTCCCCGGTTCAAATCCGGGTGCCCCCTCCA,Cys-GCA,58;tRNA-Cys-GCA-5-1,GGGGGTATAGCTCAGGGGTAGAGCATTTGACTGCAGATCAAGAGGTCCCTGGTTCAAATCCGGGTGCCCCCTCCA,Cys-GCA,58;tRNA-Cys-GCA-7-1,GGGGGTATAGCTCAGGGGTAGAGCATTTGACTGCAGATCAAGAGGTCCCCGGTTCAAATCCGGGTGCCCC…	-1.7645	0.294329	0.000717717	0.0662692	9.16968	10.9342	400.237	813.588	875.518	850.684	2042.06	2563.26
tRF-1:30-Pro-AGG-1-M3	GGCTCGTTGGTCTAGGGGTATGATTCTCGC	tRF-5c	-	-	30	tRNA-Pro-AGG-1-1,GGCTCGTTGGTCTAGGGGTATGATTCTCGCTTAGGGTGCGAGAGGTCCCGGGTTCAAATCCCGGACGAGCCCCCA,Pro-AGG,0;tRNA-Pro-CGG-1-1,GGCTCGTTGGTCTAGGGGTATGATTCTCGCTTCGGGTGCGAGAGGTCCCGGGTTCAAATCCCGGACGAGCCCCCA,Pro-CGG,0;tRNA-Pro-TGG-2-1,GGCTCGTTGGTCTAGGGGTATGATTCTCGCTTTGGGTGCGAGAGGTCCCGGGTTCAAATCCCGGACGAGCCCCCA,Pro-TGG,0	-1.77087	0.293032	0.0935386	0.536443	2.45306	4.22394	5.63714	13.3375	0	7.54487	16.2326	30.6977
tRF-+1:T19-Ser-TGA-1	GAAGCGGGTGCTTCACTTT	tRF-1	-	-	19	pre_tRNA-Ser-TGA-1-1,TGATACCCTAAAGTGTCTCCGCCTTCGTCCTTTCTCCGTAGCAGCGATGGCCGAGTGGTTAAGGCGTTGGACTTGAAATCCAATGGGGTCTCCCCGCGCAGGTTCGAACCCTGCTCGCTGCGGAAGCGGGTGCTTCACTTTTTTTTTTTTTTTTTTTTTTCA,Ser-TGA,122	-1.78277	0.290626	1	1	-1.06456	0.718204	0	0	0	0	0	7.67442
tRF-1:14-chrM.Gln-TTG	TAGGATAAGGTGTT	tRF-5a	-	-	14	chrM.tRNA22-GlnTTG,TAGGATAAGGTGTTTAGGTAGCACGGAGAATTTTGAATTCTTAAGTGTAGGTTCAATTCCTATTGTCCTAGCCA,Gln-TTG,0	-1.78277	0.290626	1	1	-1.06456	0.718204	0	0	0	0	0	7.67442
tRF-28:41-Gln-CTG-1-M5	TGGACTCTGAATCC	tRF-2	-	-	14	tRNA-Gln-CTG-1-1,GGTTCCATGGTGTAATGGTTAGCACTCTGGACTCTGAATCCAGCGACCCGAGTTCAAATCTCGGTGGGACCTCCA,Gln-CTG,27;tRNA-Gln-CTG-2-1,GGTTCCATGGTGTAATGGTTAGCACTCTGGACTCTGAATCCAGCGATCCGAGTTCAAATCTCGGTGGAACCTCCA,Gln-CTG,27;tRNA-Gln-CTG-3-1,GGTTCCATGGTGTAATGGTTAGCACTCTGGACTCTGAATCCAGCGATCCGAGTTCAAATCTCGGTGGGACCTCCA,Gln-CTG,27;tRNA-Gln-CTG-4-1,GGTTCCATGGTGTAATGGTGAGCACTCTGGACTCTGAATCCAGCGATCCGAGTTCAAATCTCGGTGGGAC…	-1.78297	0.290584	0.0274916	0.356039	3.94785	5.73082	22.5485	13.3375	16.416	39.6106	38.9581	30.6977
tRF-1:16-Tyr-GTA-1-M2	CCTTCGATAGCTCAGT	tRF-5a	-	-	16	tRNA-Tyr-GTA-1-1,CCTTCGATAGCTCAGTTGGTAGAGCGGAGGACTGTAGATCCTTAGGTCGCTGGTTCGAATCCGGCTCGAAGGACCA,Tyr-GTA,0;tRNA-Tyr-GTA-2-1,CCTTCGATAGCTCAGTTGGTAGAGCGGAGGACTGTAGATCCTTAGGTCGCTGGTTCGATTCCGGCTCGAAGGACCA,Tyr-GTA,0	-1.82307	0.282618	0.00190524	0.117278	6.29743	8.1205	33.8228	133.375	120.384	126.377	285.693	353.023
tRF-1:23-Val-TAC-1	GGTTCCATAGTGTAGCGGTTATC	tRF-5b	5014b	-	23	tRNA-Val-TAC-1-1,GGTTCCATAGTGTAGCGGTTATCACGTCTGCTTTACACGCAGAAGGTCCTGGGTTCGAGCCCCAGTGGAACCACCA,Val-TAC,0	-1.88135	0.271429	0.307504	0.693952	1.09537	2.97672	0	6.66876	0	5.65865	6.49302	0
tRF-30:43-Gln-TTG-4	GACTTTGAGTCCAG	tRF-2	-	-	14	tRNA-Gln-TTG-4-1,GGTCTCATGGTGTAATGGTTAGCACACTGGACTTTGAGTCCAGCAATCCGAGTTCGAGTCTTGGTGAGACCACCA,Gln-TTG,29	-1.88967	0.269868	0.023622	0.334437	4.84739	6.73706	45.0971	20.0063	32.8319	98.0833	51.9442	46.0465
tRF-59:76-Val-AAC-3-M2	AACCGGGCGGGAACACCA	tRF-3a	-	-	18	tRNA-Val-AAC-3-1,GTTTCCGTAGTGTAGTGGTCATCACGCTCGCCTAACACGCGAGAGGTCCCCGGTTCGAAACCGGGCGGGAACACCA,Val-AAC,58;tRNA-Val-CAC-3-1,GTTTCCGTAGTGTAGTGGTCATCACGCTCGCCTCACACGCGAGAGGTCCCCGGTTCGAAACCGGGCGGGAACACCA,Val-CAC,58	-1.89304	0.269239	0.0645931	0.466316	2.43685	4.32989	5.63714	0	10.944	8.48798	22.7256	23.0233
tRF-1:29-Val-AAC-5	GTTTCCGTAGTGTAGTGGTTATCACATTC	tRF-5c	-	-	29	tRNA-Val-AAC-5-1,GTTTCCGTAGTGTAGTGGTTATCACATTCGCCTAACACGCGAAAGGTCCCCGGTTCGAAACCGGGCGGAAACACCA,Val-AAC,0	-1.89404	0.269053	0.037368	0.373421	2.83369	4.72773	11.2743	6.66876	5.47199	5.65865	35.7116	46.0465
tRF-1:29-Val-CAC-1	GTTTCCGTAGTGTAGTGGTTATCACGCTC	tRF-5c	-	-	29	tRNA-Val-CAC-1-1,GTTTCCGTAGTGTAGTGGTTATCACGCTCGCCTCACACGCGAGAGGTCCCCGGTTCGAAACCGGGCGGAAACACCA,Val-CAC,0	-1.92936	0.262546	0.0145247	0.276853	4.56314	6.4925	33.8228	13.3375	32.8319	65.0745	25.9721	115.116
tRF-1:30-Gln-CTG-4	GGTTCCATGGTGTAATGGTGAGCACTCTGG	tRF-5c	-	-	30	tRNA-Gln-CTG-4-1,GGTTCCATGGTGTAATGGTGAGCACTCTGGACTCTGAATCCAGCGATCCGAGTTCAAATCTCGGTGGGACCTCCA,Gln-CTG,0	-1.95979	0.257066	0.0109079	0.257435	3.59744	5.55723	16.9114	13.3375	10.944	25.4639	45.4512	46.0465
tRF-30:43-Lys-CTT-1	GACTCTTAATCCTA	tRF-2	-	-	14	tRNA-Lys-CTT-1-1,GCCCAGCTAGCTCAGTTGGTAGAGCGTGGGACTCTTAATCCTAGGGTCGTGGGTTCGAACCCCACGTTGGGCGCCA,Lys-CTT,29	-1.96143	0.256774	0.164512	0.611676	1.94155	3.90298	11.2743	0	0	8.48798	6.49302	23.0233
tRF-1:29-Val-AAC-2-M3	GTTTCCGTAGTGTAGTGGTCATCACGCTC	tRF-5c	-	-	29	tRNA-Val-AAC-2-1,GTTTCCGTAGTGTAGTGGTCATCACGCTCGCCTAACACGCGAGAGGTCCCCGGTTCGAAACCGGGCGGAAACACCA,Val-AAC,0;tRNA-Val-AAC-3-1,GTTTCCGTAGTGTAGTGGTCATCACGCTCGCCTAACACGCGAGAGGTCCCCGGTTCGAAACCGGGCGGGAACACCA,Val-AAC,0;tRNA-Val-CAC-3-1,GTTTCCGTAGTGTAGTGGTCATCACGCTCGCCTCACACGCGAGAGGTCCCCGGTTCGAAACCGGGCGGGAACACCA,Val-CAC,0	-1.97959	0.253561	0.263578	0.679172	1.95617	3.93576	11.2743	0	0	15.0897	6.49302	0
tRF-1:29-Gly-CCC-2	GCATTGGTAGTTCAATGGTAGAATTCTCG	tRF-5c	-	-	29	tRNA-Gly-CCC-2-1,GCATTGGTAGTTCAATGGTAGAATTCTCGCCTCCCACGCGGGTGACCCGGGTTCGATTCCCGGCCAATGCACCA,Gly-CCC,0	-1.98689	0.252281	0.178348	0.637451	1.94377	3.93067	11.2743	0	0	11.3173	9.73953	7.67442
tiRNA-1:34-Val-TAC-1	GGTTCCATAGTGTAGCGGTTATCACGTCTGCTTT	tiRNA-5	-	-	34	tRNA-Val-TAC-1-1,GGTTCCATAGTGTAGCGGTTATCACGTCTGCTTTACACGCAGAAGGTCCTGGGTTCGAGCCCCAGTGGAACCACCA,Val-TAC,0	-2.01905	0.246721	0.216576	0.656828	1.09551	3.11456	0	6.66876	0	0	16.2326	15.3488
tRF-54:75-Glu-TTC-2	TCGACTCCCGGTATGGGAACCA	tRF-3b	3028b	-	22	tRNA-Glu-TTC-2-1,TCCCATATGGTCTAGCGGTTAGGATTCCTGGTTTTCACCCAGGCGGCCCGGGTTCGACTCCCGGTATGGGAACCA,Glu-TTC,53	-2.06399	0.239154	0.160565	0.609269	1.91219	3.97618	0	6.66876	5.47199	3.77244	32.4651	7.67442
tRF-1:28-Gly-CCC-1	GCGCCGCTGGTGTAGTGGTATCATGCAA	tRF-5c	-	-	28	tRNA-Gly-CCC-1-1,GCGCCGCTGGTGTAGTGGTATCATGCAAGATTCCCATTCTTGCGACCCGGGTTCGATTCCCGGGCGGCGCACCA,Gly-CCC,0	-2.09615	0.233882	0.0402453	0.391156	3.6077	5.70385	22.5485	6.66876	10.944	49.9848	22.7256	15.3488
tRF-1:30-Val-AAC-5	GTTTCCGTAGTGTAGTGGTTATCACATTCG	tRF-5c	-	-	30	tRNA-Val-AAC-5-1,GTTTCCGTAGTGTAGTGGTTATCACATTCGCCTAACACGCGAAAGGTCCCCGGTTCGAAACCGGGCGGAAACACCA,Val-AAC,0	-2.12617	0.229065	0.00679081	0.250807	4.69697	6.82315	56.3714	20.0063	10.944	82.9936	55.1907	115.116
tRF-1:24-Gly-ACC-1	GTTTCCGTAGTGTAGTGGTTAGCG	tRF-5b	-	-	24	tRNA-Gly-ACC-1-1,GTTTCCGTAGTGTAGTGGTTAGCGCGTTCGCCTACCAAAGCGAAAGGTCCCCGGTTCGAAACCGGGCGGAAACACCA,Gly-ACC,0	-2.19366	0.218595	0.297606	0.687555	2.50911	4.70277	16.9114	0	0	32.0657	0	0
tRF-1:30-Asp-GTC-2	TCCTCGTTAGTATAGTGGTTAGTATCCCCG	tRF-5c	-	-	30	tRNA-Asp-GTC-2-1,TCCTCGTTAGTATAGTGGTTAGTATCCCCGCCTGTCACGCGGGAGACCGGGGTTCAATTCCCCGACGGGGAGCCA,Asp-GTC,0	-2.21004	0.216128	0.0883975	0.536443	1.91992	4.12996	5.63714	0	5.47199	11.3173	6.49302	23.0233
tRF-1:14-Val-TAC-1	GGTTCCATAGTGTA	tRF-5a	-	-	14	tRNA-Val-TAC-1-1,GGTTCCATAGTGTAGCGGTTATCACGTCTGCTTTACACGCAGAAGGTCCTGGGTTCGAGCCCCAGTGGAACCACCA,Val-TAC,0	-2.21055	0.216052	0.0322467	0.356981	1.9049	4.11545	0	0	10.944	6.60176	19.4791	23.0233
tRF-1:22-Val-AAC-1-M4	GTTTCCGTAGTGTAGTGGTTAT	tRF-5b	-	-	22	tRNA-Val-AAC-1-1,GTTTCCGTAGTGTAGTGGTTATCACGTTCGCCTAACACGCGAAAGGTCCCCGGTTCGAAACCGGGCGGAAACACCA,Val-AAC,0;tRNA-Val-AAC-5-1,GTTTCCGTAGTGTAGTGGTTATCACATTCGCCTAACACGCGAAAGGTCCCCGGTTCGAAACCGGGCGGAAACACCA,Val-AAC,0;tRNA-Val-CAC-1-1,GTTTCCGTAGTGTAGTGGTTATCACGCTCGCCTCACACGCGAGAGGTCCCCGGTTCGAAACCGGGCGGAAACACCA,Val-CAC,0;tRNA-Val-CAC-2-1,GTTTCCGTAGTGTAGTGGTTATCACGTTCGCCTCACACGCGAAAGGTCCCCGGTTCGAAACCGGGCGGAA…	-2.255	0.209497	0.0351936	0.367873	1.90369	4.15869	0	0	10.944	6.60176	25.9721	15.3488
tRF-1:16-SeC-TCA-1	GCCCGGATGATCCTCA	tRF-5a	-	-	16	tRNA-SeC-TCA-1-1,GCCCGGATGATCCTCAGTGGTCTGGGGTGCAGGCTTCAAACCTGTAGCTGTTTAGCGACAGAGTGGTTCAATTCCACCTTTCGGGCGCCA,SeC-TCA,0	-2.31744	0.200623	0.0134354	0.276853	3.53851	5.85596	0	0	38.3039	32.0657	64.9302	46.0465
tRF-+1:T21-Ala-TGC-3	AACGGCTACCGCCTACCTTTT	tRF-1	1005	-	21	pre_tRNA-Ala-TGC-3-1,CAATCACTAGGGCATTTCTGAGCGTACTGTAACAGTGAGTGGGGATGTAGCTCAGTGGTAGAGCGCATGCTTTGCATGTATGAGGCCCCGGGTTCGATCCCCGGCATCTCCAAACGGCTACCGCCTACCTTTTAGCATAGTCTTTTTTTTTT,Ala-TGC,112	-2.33505	0.198189	1	1	-1.06456	1.27049	0	0	0	1.88622	0	0
tRF-56:76-Arg-ACG-1-M2	CGACTCCTGGCTGGCTCGCCA	tRF-3b	-	-	21	tRNA-Arg-ACG-1-1,GGGCCAGTGGCGCAATGGATAACGCGTCTGACTACGGATCAGAAGATTCCAGGTTCGACTCCTGGCTGGCTCGCCA,Arg-ACG,55;tRNA-Arg-ACG-3-1,GGGCCAGTGGCGCAATGGATAACGCGTCTGACTACGGATCAGAAGATTCTAGGTTCGACTCCTGGCTGGCTCGCCA,Arg-ACG,55	-2.33505	0.198189	1	1	-1.06456	1.27049	0	0	0	1.88622	0	0
tRF-1:16-Cys-GCA-8	GGGGGCATAGCTCAGG	tRF-5a	-	-	16	tRNA-Cys-GCA-8-1,GGGGGCATAGCTCAGGGGTAGAGCATTTGACTGCAGATCAAGAGGTCCCCGGTTCAAATCCGGGTGCTCCCTCCA,Cys-GCA,0	-2.37988	0.192126	0.0463026	0.420636	1.91526	4.29514	0	6.66876	5.47199	8.48798	25.9721	15.3488
tRF-58:75-Cys-GCA-8	ATCCGGGTGCTCCCTCCA	tRF-3a	-	-	18	tRNA-Cys-GCA-8-1,GGGGGCATAGCTCAGGGGTAGAGCATTTGACTGCAGATCAAGAGGTCCCCGGTTCAAATCCGGGTGCTCCCTCCA,Cys-GCA,57	-2.4272	0.185927	0.532733	0.863327	-1.06456	1.36263	0	0	0	0	6.49302	0
tRF-1:24-Leu-AAG-1-M2	GGTAGCGTGGCCGAGCGGTCTAAG	tRF-5b	-	-	24	tRNA-Leu-AAG-1-1,GGTAGCGTGGCCGAGCGGTCTAAGGCGCTGGATTAAGGCTCCAGTCTCTTCGGGGGCGTGGGTTCGAATCCCACCGCTGCCACCA,Leu-AAG,0;tRNA-Leu-TAG-1-1,GGTAGCGTGGCCGAGCGGTCTAAGGCGCTGGATTTAGGCTCCAGTCTCTTCGGAGGCGTGGGTTCGAATCCCACCGCTGCCACCA,Leu-TAG,0	-2.47442	0.179939	0.0641667	0.466316	1.103	3.57742	5.63714	0	0	1.88622	16.2326	23.0233
tRF-+1:T18-Val-CAC-3	ACACTTGTCAGTTTCTTT	tRF-1	-	-	18	pre_tRNA-Val-CAC-3-1,CATCTTGGAAGGCAAAGTGAAATAAGCAAGCTTGCTGTGTGTTTCCGTAGTGTAGTGGTCATCACGCTCGCCTCACACGCGAGAGGTCCCCGGTTCGAAACCGGGCGGGAACAACACTTGTCAGTTTCTTTTTGTTTGTTTTTGTTTTTTGTT,Val-CAC,113	-2.63918	0.16052	0.532733	0.863327	-1.06456	1.57462	0	0	0	0	0	15.3488
tRF-1:15-Gly-GCC-1	GCATGGGTGGTTCAG	tRF-5a	-	-	15	tRNA-Gly-GCC-1-1,GCATGGGTGGTTCAGTGGTAGAATTCTCGCCTGCCACGCGGGAGGCCCGGGTTCGATTCCCGGCCCATGCACCA,Gly-GCC,0	-2.74137	0.149543	0.0312603	0.356981	1.8899	4.63127	0	0	10.944	3.77244	9.73953	76.7442
tRF-1:15-Gly-TCC-1	GCGTTGGTGGTATAG	tRF-5a	-	-	15	tRNA-Gly-TCC-1-1,GCGTTGGTGGTATAGTGGTGAGCATAGCTGCCTTCCAAGCAGTTGACCCGGGTTCGATTCCCGGCCAACGCACCA,Gly-TCC,0	-2.93264	0.130975	0.299099	0.687555	-1.06456	1.86808	0	0	0	1.88622	0	7.67442
tRF-57:76-Tyr-GTA-1	GAATCCGGCTCGAAGGACCA	tRF-3b	-	-	20	tRNA-Tyr-GTA-1-1,CCTTCGATAGCTCAGTTGGTAGAGCGGAGGACTGTAGATCCTTAGGTCGCTGGTTCGAATCCGGCTCGAAGGACCA,Tyr-GTA,56	-3.22047	0.107285	0.17552	0.631416	-1.06456	2.15591	0	0	0	0	0	23.0233
tRF-1:29-Pro-TGG-4	GGCTCGTTGGTCTAGGGGTATGATTCTCA	tRF-5c	-	-	29	tRNA-Pro-TGG-4-1,GGCTCGTTGGTCTAGGGGTATGATTCTCACTTTGGGTGTGAGAGGTCCTGGGTTCAAATCCCAGGTGAGCCCCCA,Pro-TGG,0	-3.46179	0.0907609	0.0273189	0.356039	1.10643	4.56821	5.63714	0	0	20.7484	6.49302	15.3488
tRF-1:14-Val-AAC-4-M3	GTTTCTGTAGTGTA	tRF-5a	-	-	14	tRNA-Val-AAC-4-1,GTTTCTGTAGTGTAGTGGTTATCACGCTCGCCTAACACGCGAGAGGTCCCCGGTTCGAAACCGGGCAGAAACACCA,Val-AAC,0;tRNA-Val-CAC-4-1,GTTTCTGTAGTGTAGTGGTTATCACGTTCGCCTCACACGCGAAAGGTCCCCGGTTCGAAACCGGGCAGAAACACCA,Val-CAC,0;tRNA-Val-CAC-7-1,GTTTCTGTAGTGTAGTGGTTTCACATTTGCCTCACATGCAAAAGGTCCCCGGTTCTCAACCGGGCAGAAACACCA,Val-CAC,0	-3.4826	0.0894606	0.293866	0.687555	-1.06456	2.41804	0	0	0	2.82933	6.49302	0
tRF-54:75-Glu-CTC-1-M3	TCGATTCCCGGTCAGGGAACCA	tRF-3b	3045b	-	22	tRNA-Glu-CTC-1-1,TCCCTGGTGGTCTAGTGGTTAGGATTCGGCGCTCTCACCGCCGCGGCCCGGGTTCGATTCCCGGTCAGGGAACCA,Glu-CTC,53;tRNA-Glu-CTC-2-1,TCCCTGGTGGTCTAGTGGTTAGGATTTGGCGCTCTCACCGCCGCGGCCTGGGTTCGATTCCCGGTCAGGGAACCA,Glu-CTC,53;tRNA-Glu-TTC-3-1,TCCCTGGTGGTCTAGTGGCTAGGATTCGGCGCTTTCACCGCCGCGGCCCGGGTTCGATTCCCGGTCAGGGAACCA,Glu-TTC,53	-3.66227	0.0789855	0.106969	0.553325	-1.06456	2.59771	0	0	0	0	0	30.6977
tRF-1:24-Cys-GCA-11	GGGGGTATAGCTCAGGGGTAGAGT	tRF-5b	-	-	24	tRNA-Cys-GCA-11-1,GGGGGTATAGCTCAGGGGTAGAGTATTTGGCTGCAGATCAAGAGGTCCCTGGTTCAAATCCAGGTGCCCCCTCCA,Cys-GCA,0	-3.80429	0.0715803	0.119583	0.563019	-1.06456	2.73973	0	0	0	1.88622	0	23.0233
tRF-1:29-Arg-TCT-1	GGCTCCGTGGCGCAATGGATAGCGCATTG	tRF-5c	-	-	29	tRNA-Arg-TCT-1-1,GGCTCCGTGGCGCAATGGATAGCGCATTGGACTTCTAATTCAAAGGTTCCGGGTTCGAGTCCCGGCGGAGTCGCCA,Arg-TCT,0	-3.85225	0.06924	0.0184084	0.299948	1.06728	4.91953	0	0	5.47199	33.0088	9.73953	0
tRF-69:85-Leu-AAG-3-M2	TCCCACCACTGCCACCA	tRF-3a	-	-	17	tRNA-Leu-AAG-3-1,GGTAGTGTGGCCGAGCGGTCTAAGGCGCTGGATTAAGGCTCCAGTCTCTTCGGGGGCGTGGGTTCGAATCCCACCACTGCCACCA,Leu-AAG,68;tRNA-Leu-TAG-2-1,GGTAGTGTGGCCGAGCGGTCTAAGGCGCTGGATTTAGGCTCCAGTCTCTTCGGAGGCGTGGGTTCGAATCCCACCACTGCCACCA,Leu-TAG,68	-3.89917	0.0670245	0.113	0.55338	-1.06456	2.8346	0	0	0	0	16.2326	7.67442
tRF-56:75-Cys-GCA-2-M4	AAATCCGGGTGCCCCCTCCA	tRF-3b	-	-	20	tRNA-Cys-GCA-2-1,GGGGGTATAGCTCAGTGGTAGAGCATTTGACTGCAGATCAAGAGGTCCCTGGTTCAAATCCGGGTGCCCCCTCCA,Cys-GCA,55;tRNA-Cys-GCA-3-1,GGGGGTATAGCTCAGTGGTAGAGCATTTGACTGCAGATCAAGAGGTCCCCGGTTCAAATCCGGGTGCCCCCTCCA,Cys-GCA,55;tRNA-Cys-GCA-5-1,GGGGGTATAGCTCAGGGGTAGAGCATTTGACTGCAGATCAAGAGGTCCCTGGTTCAAATCCGGGTGCCCCCTCCA,Cys-GCA,55;tRNA-Cys-GCA-7-1,GGGGGTATAGCTCAGGGGTAGAGCATTTGACTGCAGATCAAGAGGTCCCCGGTTCAAATCCGGGTGCCCC…	-4.03315	0.0610804	0.0916626	0.536443	-1.06456	2.96858	0	0	0	0	3.24651	30.6977
tRF-1:30-Gln-TTG-3	GGCCCCATGGTGTAATGGTTAGCACTCTGG	tRF-5c	-	-	30	tRNA-Gln-TTG-3-1,GGCCCCATGGTGTAATGGTTAGCACTCTGGACTTTGAATCCAGCGATCCGAGTTCAAATCTCGGTGGGACCTCCA,Gln-TTG,0	-4.42362	0.0465971	0.0377465	0.373421	-1.06456	3.35905	0	0	0	3.77244	0	30.6977
tRF-29:43-Gln-CTG-1-M5	GGACTCTGAATCCAG	tRF-2	-	-	15	tRNA-Gln-CTG-1-1,GGTTCCATGGTGTAATGGTTAGCACTCTGGACTCTGAATCCAGCGACCCGAGTTCAAATCTCGGTGGGACCTCCA,Gln-CTG,28;tRNA-Gln-CTG-2-1,GGTTCCATGGTGTAATGGTTAGCACTCTGGACTCTGAATCCAGCGATCCGAGTTCAAATCTCGGTGGAACCTCCA,Gln-CTG,28;tRNA-Gln-CTG-3-1,GGTTCCATGGTGTAATGGTTAGCACTCTGGACTCTGAATCCAGCGATCCGAGTTCAAATCTCGGTGGGACCTCCA,Gln-CTG,28;tRNA-Gln-CTG-4-1,GGTTCCATGGTGTAATGGTGAGCACTCTGGACTCTGAATCCAGCGATCCGAGTTCAAATCTCGGTGGGAC…	-4.76052	0.0368927	0.0137137	0.276853	-1.06456	3.69596	0	0	0	5.65865	3.24651	30.6977
tRF-53:72-Ala-AGC-2	TTCAATCCCCGGCACCTCCA	tRF-3b	-	-	20	tRNA-Ala-AGC-2-1,GGGGGTGTAGCTCAGTGGTAGAGCGCGTGCTTAGCATGCACGAGGCCCCGGGTTCAATCCCCGGCACCTCCACCA,Ala-AGC,52	-4.97571	0.0317806	0.00567298	0.224488	-1.06456	3.91115	0	0	0	4.71554	12.986	30.6977
